# Supplementary material for: Disturbed retinoid metabolism upon loss of rlbp1a impairs cone function and leads to subretinal lipid deposits and photoreceptor degeneration in the zebrafish retina
Source: eLife. 2021 Oct 20;10:e71473. doi: 10.7554/eLife.71473 (PMC8585484; doi:10.7554/eLife.71473)
Supplement: Figure 1—source data 1. [file elife-71473-fig1-data1.xlsx]

## Sheet: Sheet1
NE = normalized expression
Fig.1B
Genotype	Target	Sample	Mean.Cq	avg_WTCq	dCt	RQ	gmRef	NE	log2NE		Genotype	Target	variable	n	min	max	median	iqr	mean	sd	se	ci
2	rlbp1a	aKO1	32.9097	28.6684	-4.24123	0.0528764	2.07551	0.0254763	-5.2947		1	rlbp1a	log2NE	3	-1.05	0.713	0.338	0.881	0	0.929	0.536	2.307
2	rlbp1a	aKO2	35.3994	28.6684	-6.73096	0.00941408	0.63667	0.0147864	-6.07958		1	rlbp1b	log2NE	3	-0.95	0.584	0.367	0.767	0	0.83	0.479	2.063
2	rlbp1a	aKO3	32.9471	28.6684	-4.27863	0.0515235	1.23411	0.0417495	-4.5821		2	rlbp1a	log2NE	3	-6.08	-4.582	-5.295	0.749	-5.319	0.749	0.432	1.861
1	rlbp1a	aWT1	27.5552	28.6684	1.1132	2.16325	1.71189	1.26366	0.337614		2	rlbp1b	log2NE	3	-0.17	0.122	0.058	0.146	0.003	0.154	0.089	0.382
1	rlbp1a	aWT2	31.0398	28.6684	-2.37132	0.193269	0.400224	0.482901	-1.0502
1	rlbp1a	aWT3	27.4103	28.6684	1.25812	2.39184	1.45956	1.63874	0.712588
2	rlbp1b	aKO1	30.4285	31.5398	1.11131	2.16041	2.07551	1.0409	0.0578378
2	rlbp1b	aKO2	32.3617	31.5398	-0.821839	0.56572	0.63667	0.888562	-0.170456
2	rlbp1b	aKO3	31.1142	31.5398	0.425615	1.34315	1.23411	1.08835	0.122142
1	rlbp1b	aWT1	30.3977	31.5398	1.14212	2.20706	1.71189	1.28925	0.366534
1	rlbp1b	aWT2	33.8114	31.5398	-2.2716	0.207101	0.400224	0.517462	-0.950476
1	rlbp1b	aWT3	30.4104	31.5398	1.12947	2.18779	1.45956	1.49894	0.583942
2	bactin	aKO1	23.9178	24.9663	1.04852	2.0684
2	bactin	aKO2	25.5799	24.9663	-0.613529	0.653596
2	bactin	aKO3	24.6783	24.9663	0.288034	1.22098
1	bactin	aWT1	24.1448	24.9663	0.821563	1.76732
1	bactin	aWT2	26.31	24.9663	-1.34365	0.394023
1	bactin	aWT3	24.4442	24.9663	0.522085	1.43603
2	g6pd	aKO1	33.0286	33.3854	0.356743	1.28053
2	g6pd	aKO2	33.7367	33.3854	-0.351326	0.783863
2	g6pd	aKO3	32.9342	33.3854	0.451193	1.36717
1	g6pd	aWT1	32.6971	33.3854	0.688231	1.61131
1	g6pd	aWT2	34.6239	33.3854	-1.2385	0.423812
1	g6pd	aWT3	32.8351	33.3854	0.550274	1.46436
2	rpl13a	aKO1	25.3086	26.367	1.05842	2.08265
2	rpl13a	aKO2	27.0562	26.367	-0.689237	0.620182
2	rpl13a	aKO3	26.0481	26.367	0.318913	1.24739
1	rpl13a	aWT1	25.6374	26.367	0.729616	1.6582
1	rpl13a	aWT2	27.6656	26.367	-1.29859	0.406523
1	rpl13a	aWT3	25.798	26.367	0.568976	1.48347
Fig.1C
Genotype	Target	Sample	Mean.Cq	avg_WTCq	dCt	RQ	gmRef	NE	log2NE		Genotype	Target	variable	n	min	max	median	iqr	mean	sd	se	ci
2	rlbp1a	bKO1	31.2932	28.2071	-3.08613	0.117756	0.234359	0.502461	-0.992915		1	rlbp1a	log2NE	3	-1.027	0.867	0.16	0.947	0	0.957	0.552	2.377
2	rlbp1a	bKO2	31.2619	28.2071	-3.05485	0.120337	0.394888	0.304736	-1.71437		1	rlbp1b	log2NE	3	-0.173	0.145	0.028	0.159	0	0.16	0.093	0.399
2	rlbp1a	bKO3	26.6801	28.2071	1.52701	2.88188	2.01157	1.43265	0.518683		2	rlbp1a	log2NE	3	-1.714	0.519	-0.993	1.117	-0.73	1.14	0.658	2.831
1	rlbp1a	bWT1	28.8508	28.2071	-0.643697	0.64007	1.30406	0.490828	-1.02671		2	rlbp1b	log2NE	3	-2.928	-0.634	-2.416	1.147	-1.993	1.204	0.695	2.991
1	rlbp1a	bWT2	26.51	28.2071	1.69714	3.24258	1.77779	1.82394	0.867055
1	rlbp1a	bWT3	29.2605	28.2071	-1.05344	0.481817	0.431341	1.11702	0.159655
2	rlbp1b	bKO1	34.5407	30.0311	-4.50956	0.0439024	0.234359	0.18733	-2.41634
2	rlbp1b	bKO2	34.2992	30.0311	-4.26804	0.0519028	0.394888	0.131437	-2.92756
2	rlbp1b	bKO3	29.6572	30.0311	0.373947	1.29589	2.01157	0.644219	-0.634377
1	rlbp1b	bWT1	29.5034	30.0311	0.527755	1.44168	1.30406	1.10553	0.144742
1	rlbp1b	bWT2	29.3736	30.0311	0.657526	1.57738	1.77779	0.887267	-0.17256
1	rlbp1b	bWT3	31.2164	30.0311	-1.18528	0.439739	0.431341	1.01947	0.0278178
2	bactin	bKO1	27.0633	25.0395	-2.02372	0.245924
2	bactin	bKO2	26.7314	25.0395	-1.69186	0.309528
2	bactin	bKO3	24.4133	25.0395	0.626213	1.54351
1	bactin	bWT1	24.8874	25.0395	0.152128	1.11121
1	bactin	bWT2	24.4441	25.0395	0.595401	1.51089
1	bactin	bWT3	25.7871	25.0395	-0.747529	0.595623
2	g6pd	bKO1	34.8663	32.8951	-1.97116	0.255048
2	g6pd	bKO2	34.0691	32.8951	-1.17393	0.443213
2	g6pd	bKO3	31.163	32.8951	1.73214	3.3222
1	g6pd	bWT1	32.0533	32.8951	0.841794	1.79228
1	g6pd	bWT2	31.7222	32.8951	1.17298	2.25478
1	g6pd	bWT3	34.9099	32.8951	-2.01478	0.247452
2	rpl13a	bKO1	28.6672	26.3825	-2.28475	0.20522
2	rpl13a	bKO2	27.5382	26.3825	-1.15567	0.448858
2	rpl13a	bKO3	25.7159	26.3825	0.666623	1.58735
1	rpl13a	bWT1	26.2274	26.3825	0.155117	1.11351
1	rpl13a	bWT2	25.6606	26.3825	0.721873	1.64932
1	rpl13a	bWT3	27.2595	26.3825	-0.876991	0.544502
