# Supplementary material for: Disturbed retinoid metabolism upon loss of rlbp1a impairs cone function and leads to subretinal lipid deposits and photoreceptor degeneration in the zebrafish retina
Source: eLife. 2021 Oct 20;10:e71473. doi: 10.7554/eLife.71473 (PMC8585484; doi:10.7554/eLife.71473)
Supplement: Figure 2—source data 1. [file elife-71473-fig2-data1.xlsx]

## Sheet: Fig2A
													Fig.2A
													tube	genotype	gene	retinoid_species	amount		genotype	retinoid_species	variable	n	min	max	median	iqr	mean	sd	se	ci
													D9076A=+/+	rlbp1a +/+	rlbp1a	11cisRE	7.32		rlbp1a +/+	11cisRAL	amount	3	232.891	448.418	255.881	107.764	312.396	118.358	68.334	294.017
													D9077A=+/+	rlbp1a +/+	rlbp1a	11cisRE	16.08		rlbp1a +/+	11cisRE	amount	3	7.32	16.08	14.64	4.38	12.68	4.697	2.712	11.669
													D9073=+/+	rlbp1a +/+	rlbp1a	11cisRE	14.64		rlbp1a +/+	atRE	amount	3	144.141	216.172	144.766	36.016	168.359	41.408	23.907	102.863
													D9078A=+/-	rlbp1a +/-	rlbp1a	11cisRE	30.84		rlbp1a +/-	11cisRAL	amount	3	221.556	350.744	308.672	64.594	293.657	65.89	38.041	163.679
													D9028A=+/-	rlbp1a +/-	rlbp1a	11cisRE	7.56		rlbp1a +/-	11cisRE	amount	3	7.56	38.4	30.84	15.42	25.6	16.074	9.28	39.93
													D9074=+/-	rlbp1a +/-	rlbp1a	11cisRE	38.4		rlbp1a +/-	atRE	amount	3	193.984	436.797	270.547	121.406	300.443	124.136	71.67	308.371
													D9029A=-/-	rlbp1a -/-	rlbp1a	11cisRE	317.52		rlbp1a -/-	11cisRAL	amount	3	33.068	126.351	123.405	46.642	94.275	53.027	30.615	131.727
													D9079A=-/-	rlbp1a -/-	rlbp1a	11cisRE	182.04		rlbp1a -/-	11cisRE	amount	3	166.92	317.52	182.04	75.3	222.16	82.929	47.879	206.008
													D9075=-/-	rlbp1a -/-	rlbp1a	11cisRE	166.92		rlbp1a -/-	atRE	amount	3	707.266	1868.91	911.016	580.82	1162.4	620.279	358.118	1540.86
													D9076A=+/+	rlbp1a +/+	rlbp1a	11cisRAL	255.881
													D9077A=+/+	rlbp1a +/+	rlbp1a	11cisRAL	232.891
													D9073=+/+	rlbp1a +/+	rlbp1a	11cisRAL	448.418
													D9078A=+/-	rlbp1a +/-	rlbp1a	11cisRAL	221.556
													D9028A=+/-	rlbp1a +/-	rlbp1a	11cisRAL	308.672
													D9074=+/-	rlbp1a +/-	rlbp1a	11cisRAL	350.744
													D9029A=-/-	rlbp1a -/-	rlbp1a	11cisRAL	33.0679
													D9079A=-/-	rlbp1a -/-	rlbp1a	11cisRAL	126.351
													D9075=-/-	rlbp1a -/-	rlbp1a	11cisRAL	123.405
													D9076A=+/+	rlbp1a +/+	rlbp1a	atRE	144.141
													D9077A=+/+	rlbp1a +/+	rlbp1a	atRE	216.172
													D9073=+/+	rlbp1a +/+	rlbp1a	atRE	144.766
													D9078A=+/-	rlbp1a +/-	rlbp1a	atRE	270.547
													D9028A=+/-	rlbp1a +/-	rlbp1a	atRE	193.984
													D9074=+/-	rlbp1a +/-	rlbp1a	atRE	436.797
													D9029A=-/-	rlbp1a -/-	rlbp1a	atRE	1868.91
													D9079A=-/-	rlbp1a -/-	rlbp1a	atRE	911.016
													D9075=-/-	rlbp1a -/-	rlbp1a	atRE	707.266

## Sheet: Fig2B
Fig.2B
tube	genotype	condition	retinoid_species	amount		genotype	condition	retinoid_species	variable	n	min	max	median	iqr	mean	sd	se	ci
WT_137_1	rlbp1a +/+	DA	11cisRE	0.108		rlbp1a +/+	DA	11cisRAL	amount	3	1.727	2.531	1.853	0.402	2.037	0.432	0.25	1.074
WT_137_2	rlbp1a +/+	30' BL	11cisRE	0.0204		rlbp1a +/+	DA	11cisRE	amount	3	0.083	0.108	0.096	0.013	0.096	0.013	0.007	0.031
WT_137_3	rlbp1a +/+	1h BL	11cisRE	0.0336		rlbp1a +/+	DA	atRE	amount	3	0.115	0.839	0.119	0.362	0.358	0.417	0.241	1.036
WT_137_4	rlbp1a +/+	1h reDA	11cisRE	0.0612		rlbp1a +/+	ambient	11cisRAL	amount	3	1.674	2.096	1.809	0.211	1.86	0.216	0.125	0.536
WT_137_5	rlbp1a +/+	ambient	11cisRE	0.03		rlbp1a +/+	ambient	11cisRE	amount	3	0	0.037	0.03	0.019	0.022	0.02	0.011	0.049
aKO_137_1	rlbp1a -/-	DA	11cisRE	0.4032		rlbp1a +/+	ambient	atRE	amount	3	0.219	0.495	0.308	0.138	0.341	0.141	0.082	0.351
aKO_137_2	rlbp1a -/-	30' BL	11cisRE	0.1836		rlbp1a +/+	30' BL	11cisRAL	amount	3	1.364	1.509	1.38	0.072	1.418	0.079	0.046	0.197
aKO_137_3	rlbp1a -/-	1h BL	11cisRE	0.1968		rlbp1a +/+	30' BL	11cisRE	amount	3	0.02	0.029	0.029	0.004	0.026	0.005	0.003	0.012
aKO_137_4	rlbp1a -/-	1h reDA	11cisRE	0.174		rlbp1a +/+	30' BL	atRE	amount	3	0.319	0.461	0.359	0.071	0.38	0.073	0.042	0.182
aKO_137_5	rlbp1a -/-	ambient	11cisRE	0.3468		rlbp1a +/+	1h BL	11cisRAL	amount	3	1.372	1.794	1.401	0.211	1.522	0.236	0.136	0.586
WT_156_1	rlbp1a +/+	DA	11cisRE	0.0828		rlbp1a +/+	1h BL	11cisRE	amount	3	0	0.034	0.032	0.017	0.022	0.019	0.011	0.047
WT_156_2	rlbp1a +/+	30' BL	11cisRE	0.0288		rlbp1a +/+	1h BL	atRE	amount	3	0.282	0.391	0.362	0.054	0.345	0.056	0.033	0.14
WT_156_3	rlbp1a +/+	1h BL	11cisRE	0		rlbp1a +/+	1h reDA	11cisRAL	amount	3	1.11	2.248	2.15	0.569	1.836	0.63	0.364	1.566
WT_156_4	rlbp1a +/+	1h reDA	11cisRE	0		rlbp1a +/+	1h reDA	11cisRE	amount	3	0	0.061	0.029	0.031	0.03	0.031	0.018	0.076
WT_156_5	rlbp1a +/+	ambient	11cisRE	0		rlbp1a +/+	1h reDA	atRE	amount	3	0.091	0.372	0.136	0.141	0.199	0.151	0.087	0.375
aKO_156_1	rlbp1a -/-	DA	11cisRE	0.0804		rlbp1a -/-	DA	11cisRAL	amount	3	0.761	1.214	1.122	0.227	1.032	0.239	0.138	0.595
aKO_156_2	rlbp1a -/-	30' BL	11cisRE	0.0456		rlbp1a -/-	DA	11cisRE	amount	3	0.08	0.403	0.173	0.161	0.219	0.166	0.096	0.413
aKO_156_3	rlbp1a -/-	1h BL	11cisRE	0.0504		rlbp1a -/-	DA	atRE	amount	3	0.116	0.665	0.197	0.275	0.326	0.296	0.171	0.736
aKO_156_4	rlbp1a -/-	1h reDA	11cisRE	0.0684		rlbp1a -/-	ambient	11cisRAL	amount	3	0.111	0.601	0.447	0.245	0.386	0.25	0.144	0.621
aKO_156_5	rlbp1a -/-	ambient	11cisRE	0.0756		rlbp1a -/-	ambient	11cisRE	amount	3	0.064	0.347	0.076	0.142	0.162	0.16	0.092	0.398
WT_168_1	rlbp1a +/+	DA	11cisRE	0.096		rlbp1a -/-	ambient	atRE	amount	3	0.264	1.395	0.305	0.565	0.654	0.641	0.37	1.593
WT_168_2	rlbp1a +/+	30' BL	11cisRE	0.0288		rlbp1a -/-	30' BL	11cisRAL	amount	3	0.232	0.392	0.301	0.08	0.309	0.08	0.046	0.199
WT_168_3	rlbp1a +/+	1h BL	11cisRE	0.0324		rlbp1a -/-	30' BL	11cisRE	amount	3	0.046	0.184	0.054	0.069	0.094	0.077	0.045	0.192
WT_168_4	rlbp1a +/+	1h reDA	11cisRE	0.0288		rlbp1a -/-	30' BL	atRE	amount	3	0.375	0.796	0.425	0.211	0.532	0.23	0.133	0.571
WT_168_5	rlbp1a +/+	ambient	11cisRE	0.0372		rlbp1a -/-	1h BL	11cisRAL	amount	3	0.219	0.367	0.24	0.074	0.275	0.08	0.046	0.198
aKO_168_1	rlbp1a -/-	DA	11cisRE	0.1728		rlbp1a -/-	1h BL	11cisRE	amount	3	0.028	0.197	0.05	0.085	0.092	0.092	0.053	0.228
aKO_168_2	rlbp1a -/-	30' BL	11cisRE	0.054		rlbp1a -/-	1h BL	atRE	amount	3	0.35	1.017	0.523	0.334	0.63	0.346	0.2	0.86
aKO_168_3	rlbp1a -/-	1h BL	11cisRE	0.0276		rlbp1a -/-	1h reDA	11cisRAL	amount	3	0.479	0.685	0.61	0.103	0.591	0.104	0.06	0.259
aKO_168_4	rlbp1a -/-	1h reDA	11cisRE	0.0768		rlbp1a -/-	1h reDA	11cisRE	amount	3	0.068	0.174	0.077	0.053	0.106	0.059	0.034	0.146
aKO_168_5	rlbp1a -/-	ambient	11cisRE	0.0636		rlbp1a -/-	1h reDA	atRE	amount	3	0.283	1.329	0.338	0.523	0.65	0.589	0.34	1.463
WT_137_1	rlbp1a +/+	DA	11cisRAL	2.53073
WT_137_2	rlbp1a +/+	30' BL	11cisRAL	1.50868
WT_137_3	rlbp1a +/+	1h BL	11cisRAL	1.79405
WT_137_4	rlbp1a +/+	1h reDA	11cisRAL	2.24767
WT_137_5	rlbp1a +/+	ambient	11cisRAL	1.80941
aKO_137_1	rlbp1a -/-	DA	11cisRAL	1.12177
aKO_137_2	rlbp1a -/-	30' BL	11cisRAL	0.392412
aKO_137_3	rlbp1a -/-	1h BL	11cisRAL	0.36655
aKO_137_4	rlbp1a -/-	1h reDA	11cisRAL	0.684776
aKO_137_5	rlbp1a -/-	ambient	11cisRAL	0.600516
WT_156_1	rlbp1a +/+	DA	11cisRAL	1.7269
WT_156_2	rlbp1a +/+	30' BL	11cisRAL	1.36382
WT_156_3	rlbp1a +/+	1h BL	11cisRAL	1.37162
WT_156_4	rlbp1a +/+	1h reDA	11cisRAL	1.11019
WT_156_5	rlbp1a +/+	ambient	11cisRAL	1.67361
aKO_156_1	rlbp1a -/-	DA	11cisRAL	0.760641
aKO_156_2	rlbp1a -/-	30' BL	11cisRAL	0.30129
aKO_156_3	rlbp1a -/-	1h BL	11cisRAL	0.219231
aKO_156_4	rlbp1a -/-	1h reDA	11cisRAL	0.478528
aKO_156_5	rlbp1a -/-	ambient	11cisRAL	0.446753
WT_168_1	rlbp1a +/+	DA	11cisRAL	1.85267
WT_168_2	rlbp1a +/+	30' BL	11cisRAL	1.38019
WT_168_3	rlbp1a +/+	1h BL	11cisRAL	1.40122
WT_168_4	rlbp1a +/+	1h reDA	11cisRAL	2.14958
WT_168_5	rlbp1a +/+	ambient	11cisRAL	2.09604
aKO_168_1	rlbp1a -/-	DA	11cisRAL	1.21365
aKO_168_2	rlbp1a -/-	30' BL	11cisRAL	0.232495
aKO_168_3	rlbp1a -/-	1h BL	11cisRAL	0.239597
aKO_168_4	rlbp1a -/-	1h reDA	11cisRAL	0.610068
aKO_168_5	rlbp1a -/-	ambient	11cisRAL	0.111351
WT_137_1	rlbp1a +/+	DA	atRE	0.839063
WT_137_2	rlbp1a +/+	30' BL	atRE	0.460938
WT_137_3	rlbp1a +/+	1h BL	atRE	0.390625
WT_137_4	rlbp1a +/+	1h reDA	atRE	0.371875
WT_137_5	rlbp1a +/+	ambient	atRE	0.495312
aKO_137_1	rlbp1a -/-	DA	atRE	0.664844
aKO_137_2	rlbp1a -/-	30' BL	atRE	0.796094
aKO_137_3	rlbp1a -/-	1h BL	atRE	1.01719
aKO_137_4	rlbp1a -/-	1h reDA	atRE	1.32891
aKO_137_5	rlbp1a -/-	ambient	atRE	1.39453
WT_156_1	rlbp1a +/+	DA	atRE	0.11875
WT_156_2	rlbp1a +/+	30' BL	atRE	0.31875
WT_156_3	rlbp1a +/+	1h BL	atRE	0.282031
WT_156_4	rlbp1a +/+	1h reDA	atRE	0.090625
WT_156_5	rlbp1a +/+	ambient	atRE	0.21875
aKO_156_1	rlbp1a -/-	DA	atRE	0.115625
aKO_156_2	rlbp1a -/-	30' BL	atRE	0.425
aKO_156_3	rlbp1a -/-	1h BL	atRE	0.35
aKO_156_4	rlbp1a -/-	1h reDA	atRE	0.282813
aKO_156_5	rlbp1a -/-	ambient	atRE	0.264062
WT_168_1	rlbp1a +/+	DA	atRE	0.114844
WT_168_2	rlbp1a +/+	30' BL	atRE	0.359375
WT_168_3	rlbp1a +/+	1h BL	atRE	0.3625
WT_168_4	rlbp1a +/+	1h reDA	atRE	0.135937
WT_168_5	rlbp1a +/+	ambient	atRE	0.307812
aKO_168_1	rlbp1a -/-	DA	atRE	0.196875
aKO_168_2	rlbp1a -/-	30' BL	atRE	0.375
aKO_168_3	rlbp1a -/-	1h BL	atRE	0.523438
aKO_168_4	rlbp1a -/-	1h reDA	atRE	0.3375
aKO_168_5	rlbp1a -/-	ambient	atRE	0.304688

## Sheet: Fig2C
Fig.2C
tube	genotype	gene	retinoid_species	amount		genotype	retinoid_species	variable	n	min	max	median	iqr	mean	sd	se	ci
D9055B=+/+	rlbp1b +/+	rlbp1b	11cisRE	86.4		rlbp1b +/+	11cisRAL	amount	3	162.215	195.245	174.451	16.515	177.303	16.699	9.641	41.482
D9058B=+/+	rlbp1b +/+	rlbp1b	11cisRE	77.28		rlbp1b +/+	11cisRE	amount	3	77.28	94.68	86.4	8.7	86.12	8.703	5.025	21.62
D9062 =+/+	rlbp1b +/+	rlbp1b	11cisRE	94.68		rlbp1b +/+	atRE	amount	3	359.375	633.93	385.625	137.277	459.643	151.506	87.472	376.362
D9056B=+/-	rlbp1b +/-	rlbp1b	11cisRE	10.8		rlbp1b +/-	11cisRAL	amount	3	204.896	251.599	230.207	23.352	228.901	23.379	13.498	58.077
D9059B=+/-	rlbp1b +/-	rlbp1b	11cisRE	12.6		rlbp1b +/-	11cisRE	amount	3	10.8	35.04	12.6	12.12	19.48	13.505	7.797	33.549
D9063 =+/-	rlbp1b +/-	rlbp1b	11cisRE	35.04		rlbp1b +/-	atRE	amount	3	161.25	338.281	295.156	88.516	264.896	92.314	53.297	229.319
D9057B=-/-	rlbp1b -/-	rlbp1b	11cisRE	14.76		rlbp1b -/-	11cisRAL	amount	3	184.503	258.023	236.869	36.76	226.465	37.848	21.852	94.021
D9060B=-/-	rlbp1b -/-	rlbp1b	11cisRE	26.88		rlbp1b -/-	11cisRE	amount	3	9.24	26.88	14.76	8.82	16.96	9.023	5.21	22.415
D9064 =-/-	rlbp1b -/-	rlbp1b	11cisRE	9.24		rlbp1b -/-	atRE	amount	3	160.625	313.281	216.875	76.328	230.26	77.203	44.573	191.784
D9055B=+/+	rlbp1b +/+	rlbp1b	11cisRAL	174.451
D9058B=+/+	rlbp1b +/+	rlbp1b	11cisRAL	195.245
D9062 =+/+	rlbp1b +/+	rlbp1b	11cisRAL	162.215
D9056B=+/-	rlbp1b +/-	rlbp1b	11cisRAL	204.896
D9059B=+/-	rlbp1b +/-	rlbp1b	11cisRAL	230.207
D9063 =+/-	rlbp1b +/-	rlbp1b	11cisRAL	251.599
D9057B=-/-	rlbp1b -/-	rlbp1b	11cisRAL	236.869
D9060B=-/-	rlbp1b -/-	rlbp1b	11cisRAL	184.503
D9064 =-/-	rlbp1b -/-	rlbp1b	11cisRAL	258.023
D9055B=+/+	rlbp1b +/+	rlbp1b	atRE	359.375
D9058B=+/+	rlbp1b +/+	rlbp1b	atRE	385.625
D9062 =+/+	rlbp1b +/+	rlbp1b	atRE	633.93
D9056B=+/-	rlbp1b +/-	rlbp1b	atRE	295.156
D9059B=+/-	rlbp1b +/-	rlbp1b	atRE	161.25
D9063 =+/-	rlbp1b +/-	rlbp1b	atRE	338.281
D9057B=-/-	rlbp1b -/-	rlbp1b	atRE	313.281
D9060B=-/-	rlbp1b -/-	rlbp1b	atRE	216.875
D9064 =-/-	rlbp1b -/-	rlbp1b	atRE	160.625

## Sheet: Fig2D
Fig.2D
tube	genotype	condition	retinoid_species	amount		genotype	condition	retinoid_species	variable	n	min	max	median	iqr	mean	sd	se	ci
B_WT_DMSO_2	rlbp1b +/+	DA	11cisRE	0.0576		rlbp1b +/+	DA	11cisRAL	amount	6	1.538	2.731	1.923	0.677	2.038	0.476	0.194	0.5
B_WT_DMSO_6	rlbp1b +/+	1h BL	11cisRE	0.024		rlbp1b +/+	DA	11cisRE	amount	6	0.058	0.48	0.103	0.096	0.165	0.161	0.066	0.169
B_WT_DMSO_8	rlbp1b +/+	1h reDA	11cisRE	0.0312		rlbp1b +/+	DA	atRE	amount	6	0.096	0.741	0.161	0.117	0.265	0.242	0.099	0.254
B_KO_DMSO_2	rlbp1b -/-	DA	11cisRE	0.0588		rlbp1b +/+	1h BL	11cisRAL	amount	6	0.49	1.491	0.728	0.517	0.853	0.401	0.164	0.421
B_KO_DMSO_6	rlbp1b -/-	1h BL	11cisRE	0.0252		rlbp1b +/+	1h BL	11cisRE	amount	6	0.024	0.134	0.069	0.075	0.078	0.047	0.019	0.049
B_KO_DMSO_8	rlbp1b -/-	1h reDA	11cisRE	0.0312		rlbp1b +/+	1h BL	atRE	amount	6	0.37	1.02	0.816	0.391	0.746	0.265	0.108	0.278
WT_193_2	rlbp1b +/+	DA	11cisRE	0.186		rlbp1b +/+	1h reDA	11cisRAL	amount	6	0.541	2.418	1.315	1.171	1.417	0.769	0.314	0.808
WT_193_6	rlbp1b +/+	1h BL	11cisRE	0.1344		rlbp1b +/+	1h reDA	11cisRE	amount	6	0.031	0.096	0.056	0.053	0.06	0.03	0.012	0.032
WT_193_8	rlbp1b +/+	1h reDA	11cisRE	0.0768		rlbp1b +/+	1h reDA	atRE	amount	6	0.222	0.945	0.582	0.46	0.6	0.299	0.122	0.314
BKO_193_2	rlbp1b -/-	DA	11cisRE	0.5376		rlbp1b -/-	DA	11cisRAL	amount	6	1.592	2.507	1.941	0.406	2.032	0.34	0.139	0.357
BKO_193_6	rlbp1b -/-	1h BL	11cisRE	0.126		rlbp1b -/-	DA	11cisRE	amount	6	0.059	0.538	0.249	0.188	0.253	0.175	0.072	0.184
BKO_193_8	rlbp1b -/-	1h reDA	11cisRE	0.1764		rlbp1b -/-	DA	atRE	amount	6	0.095	0.936	0.482	0.347	0.46	0.308	0.126	0.323
WT_196_2	rlbp1b +/+	DA	11cisRE	0.0612		rlbp1b -/-	1h BL	11cisRAL	amount	6	0.5	1.889	1.048	0.596	1.043	0.518	0.212	0.544
WT_196_6	rlbp1b +/+	1h BL	11cisRE	0.048		rlbp1b -/-	1h BL	11cisRE	amount	6	0.025	0.287	0.083	0.069	0.108	0.095	0.039	0.1
WT_196_8	rlbp1b +/+	1h reDA	11cisRE	0.036		rlbp1b -/-	1h BL	atRE	amount	6	0.701	1.645	1.181	0.482	1.178	0.355	0.145	0.373
BKO_196_2	rlbp1b -/-	DA	11cisRE	0.2484		rlbp1b -/-	1h reDA	11cisRAL	amount	6	0.415	2.481	1	0.97	1.262	0.796	0.325	0.835
BKO_196_6	rlbp1b -/-	1h BL	11cisRE	0.0984		rlbp1b -/-	1h reDA	11cisRE	amount	6	0.026	0.206	0.116	0.112	0.112	0.074	0.03	0.077
BKO_196_8	rlbp1b -/-	1h reDA	11cisRE	0.1092		rlbp1b -/-	1h reDA	atRE	amount	6	0.334	1.597	1.061	0.325	1.004	0.422	0.172	0.443
B_WT_DMSO_2	rlbp1b +/+	DA	11cisRAL	2.44122
B_WT_DMSO_6	rlbp1b +/+	1h BL	11cisRAL	1.49056
B_WT_DMSO_8	rlbp1b +/+	1h reDA	11cisRAL	2.41787
B_KO_DMSO_2	rlbp1b -/-	DA	11cisRAL	2.50662
B_KO_DMSO_6	rlbp1b -/-	1h BL	11cisRAL	1.24466
B_KO_DMSO_8	rlbp1b -/-	1h reDA	11cisRAL	2.48104
WT_193_2	rlbp1b +/+	DA	11cisRAL	1.72025
WT_193_6	rlbp1b +/+	1h BL	11cisRAL	1.18245
WT_193_8	rlbp1b +/+	1h reDA	11cisRAL	2.09978
BKO_193_2	rlbp1b -/-	DA	11cisRAL	1.88198
BKO_193_6	rlbp1b -/-	1h BL	11cisRAL	1.1662
BKO_193_8	rlbp1b -/-	1h reDA	11cisRAL	1.97457
WT_196_2	rlbp1b +/+	DA	11cisRAL	1.67361
WT_196_6	rlbp1b +/+	1h BL	11cisRAL	0.732787
WT_196_8	rlbp1b +/+	1h reDA	11cisRAL	0.54096
BKO_196_2	rlbp1b -/-	DA	11cisRAL	1.85371
BKO_196_6	rlbp1b -/-	1h BL	11cisRAL	0.930327
BKO_196_8	rlbp1b -/-	1h reDA	11cisRAL	0.415405
B_WT_DMSO_2	rlbp1b +/+	DA	atRE	0.0960938
B_WT_DMSO_6	rlbp1b +/+	1h BL	atRE	0.369531
B_WT_DMSO_8	rlbp1b +/+	1h reDA	atRE	0.221875
B_KO_DMSO_2	rlbp1b -/-	DA	atRE	0.0953125
B_KO_DMSO_6	rlbp1b -/-	1h BL	atRE	0.890625
B_KO_DMSO_8	rlbp1b -/-	1h reDA	atRE	0.333594
WT_193_2	rlbp1b +/+	DA	atRE	0.289844
WT_193_6	rlbp1b +/+	1h BL	atRE	0.899219
WT_193_8	rlbp1b +/+	1h reDA	atRE	0.566406
BKO_193_2	rlbp1b -/-	DA	atRE	0.935937
BKO_193_6	rlbp1b -/-	1h BL	atRE	1.64453
BKO_193_8	rlbp1b -/-	1h reDA	atRE	1.12969
WT_196_2	rlbp1b +/+	DA	atRE	0.149219
WT_196_6	rlbp1b +/+	1h BL	atRE	0.494531
WT_196_8	rlbp1b +/+	1h reDA	atRE	0.596875
BKO_196_2	rlbp1b -/-	DA	atRE	0.507031
BKO_196_6	rlbp1b -/-	1h BL	atRE	1.08906
BKO_196_8	rlbp1b -/-	1h reDA	atRE	0.991406

## Sheet: Fig2E
Fig.2E
tube	genotype	gene	retinoid_species	amount		genotype	retinoid_species	variable	n	min	max	median	iqr	mean	sd	se	ci
WT_1	WT	rlbp1a;rlbp1b	11cisRE	4.92		WT	11cisRAL	amount	3	276.985	284.558	279.567	3.786	280.37	3.85	2.223	9.563
WT_2	WT	rlbp1a;rlbp1b	11cisRE	10.68		WT	11cisRE	amount	3	4.92	10.68	6.12	2.88	7.24	3.039	1.755	7.549
WT_3	WT	rlbp1a;rlbp1b	11cisRE	6.12		WT	atRE	amount	3	124.531	302.422	132.891	88.945	186.615	100.379	57.954	249.356
124_DKO_1	dbKO	rlbp1a;rlbp1b	11cisRE	30.36		dbKO	11cisRAL	amount	3	79.875	132.152	124.565	26.138	112.197	28.248	16.309	70.171
124_DKO_2	dbKO	rlbp1a;rlbp1b	11cisRE	70.08		dbKO	11cisRE	amount	3	30.36	70.08	59.28	19.86	53.24	20.537	11.857	51.017
124_DKO_3	dbKO	rlbp1a;rlbp1b	11cisRE	59.28		dbKO	atRE	amount	3	221.953	563.438	517.422	170.742	434.271	185.306	106.987	460.327
WT_1	WT	rlbp1a;rlbp1b	11cisRAL	284.558
WT_2	WT	rlbp1a;rlbp1b	11cisRAL	279.567
WT_3	WT	rlbp1a;rlbp1b	11cisRAL	276.985
124_DKO_1	dbKO	rlbp1a;rlbp1b	11cisRAL	79.8754
124_DKO_2	dbKO	rlbp1a;rlbp1b	11cisRAL	132.152
124_DKO_3	dbKO	rlbp1a;rlbp1b	11cisRAL	124.565
WT_1	WT	rlbp1a;rlbp1b	atRE	132.891
WT_2	WT	rlbp1a;rlbp1b	atRE	302.422
WT_3	WT	rlbp1a;rlbp1b	atRE	124.531
124_DKO_1	dbKO	rlbp1a;rlbp1b	atRE	221.953
124_DKO_2	dbKO	rlbp1a;rlbp1b	atRE	563.438
124_DKO_3	dbKO	rlbp1a;rlbp1b	atRE	517.422
