# Supplementary material for: Disturbed retinoid metabolism upon loss of rlbp1a impairs cone function and leads to subretinal lipid deposits and photoreceptor degeneration in the zebrafish retina
Source: eLife. 2021 Oct 20;10:e71473. doi: 10.7554/eLife.71473 (PMC8585484; doi:10.7554/eLife.71473)
Supplement: Figure 3—source data 1. [file elife-71473-fig3-data1.xlsx]

## Sheet: Fig3A
Fig.3A																			sqrt-transformed
fish	genotype	exp	intensity	amplitude		genotype	intensity	variable	n	min	max	median	iqr	mean	sd	se	ci		fish	genotype	exp	intensity	amplitude		genotype	intensity	variable	n	min	max	median	iqr	mean	sd	se	ci
41	2	59	0.0001	2.16202		1	0.0001	amplitude	19	0.173	2.3	1.096	0.726	1.165	0.58	0.133	0.28		41	2	59	0.0001	1.47038		1	0.0001	amplitude	19	0.415	1.517	1.047	0.338	1.041	0.293	0.067	0.141
42	2	59	0.0001	1.02359		1	0.001	amplitude	19	1.526	7.745	3.2	2.068	3.794	1.627	0.373	0.784		42	2	59	0.0001	1.01173		1	0.001	amplitude	19	1.235	2.783	1.789	0.545	1.907	0.407	0.093	0.196
43	3	59	0.0001	0.299706		1	0.01	amplitude	19	3.868	13.608	6.145	4.213	7.569	2.955	0.678	1.424		43	3	59	0.0001	0.547454		1	0.01	amplitude	19	1.967	3.689	2.479	0.784	2.704	0.52	0.119	0.251
44	1	59	0.0001	0.336314		1	0.1	amplitude	19	2.41	16.141	7.207	3.423	7.929	3.588	0.823	1.73		44	1	59	0.0001	0.579926		1	0.1	amplitude	19	1.553	4.018	2.685	0.606	2.744	0.647	0.149	0.312
45	3	59	0.0001	0.680373		1	1	amplitude	19	1.145	14.178	6.906	3.234	7.305	3.833	0.879	1.847		45	3	59	0.0001	0.824847		1	1	amplitude	19	1.07	3.765	2.628	0.626	2.598	0.766	0.176	0.369
46	2	59	0.0001	0.327922		2	0.0001	amplitude	53	0.092	3.104	0.644	0.728	0.925	0.696	0.096	0.192		46	2	59	0.0001	0.572644		2	0.0001	amplitude	53	0.304	1.762	0.803	0.415	0.901	0.338	0.046	0.093
47	2	59	0.0001	0.562882		2	0.001	amplitude	53	0.346	7.266	2.826	2.175	3.19	1.701	0.234	0.469		47	2	59	0.0001	0.750255		2	0.001	amplitude	53	0.588	2.696	1.681	0.63	1.718	0.494	0.068	0.136
48	1	59	0.0001	1.09561		2	0.01	amplitude	53	0.879	13.178	6.351	4.312	6.765	3.241	0.445	0.893		48	1	59	0.0001	1.04671		2	0.01	amplitude	53	0.938	3.63	2.52	0.835	2.514	0.675	0.093	0.186
49	2	59	0.0001	0.563784		2	0.1	amplitude	53	1.112	17.041	6.102	4.922	6.883	3.864	0.531	1.065		49	2	59	0.0001	0.750856		2	0.1	amplitude	53	1.054	4.128	2.47	0.978	2.522	0.732	0.1	0.202
50	2	59	0.0001	0.929627		2	1	amplitude	53	0.828	18.408	5.534	4.808	6.399	4.046	0.556	1.115		50	2	59	0.0001	0.964172		2	1	amplitude	53	0.91	4.29	2.353	1.034	2.415	0.76	0.104	0.21
51	1	59	0.0001	0.374706		3	0.0001	amplitude	18	0.074	1.118	0.35	0.268	0.431	0.267	0.063	0.133		51	1	59	0.0001	0.612132		3	0.0001	amplitude	18	0.273	1.057	0.592	0.209	0.627	0.199	0.047	0.099
52	2	59	0.0001	1.14341		3	0.001	amplitude	18	0.152	3.084	1.604	1.825	1.601	0.997	0.235	0.496		52	2	59	0.0001	1.0693		3	0.001	amplitude	18	0.39	1.756	1.266	0.767	1.193	0.434	0.102	0.216
53	2	59	0.0001	0.74649		3	0.01	amplitude	18	0.802	8.319	5.1	5.512	4.51	2.768	0.653	1.377		53	2	59	0.0001	0.863997		3	0.01	amplitude	18	0.896	2.884	2.256	1.481	1.999	0.739	0.174	0.368
54	3	59	0.0001	0.562784		3	0.1	amplitude	18	0.912	8.685	4.508	4.261	4.23	2.513	0.592	1.25		54	3	59	0.0001	0.75019		3	0.1	amplitude	18	0.955	2.947	2.123	1.143	1.954	0.661	0.156	0.329
55	3	59	0.0001	0.362275		3	1	amplitude	18	0.123	7.415	3.826	4.028	3.64	2.213	0.521	1.1		55	3	59	0.0001	0.601892		3	1	amplitude	18	0.35	2.723	1.956	1.119	1.797	0.661	0.156	0.329
56	2	59	0.0001	0.757157															56	2	59	0.0001	0.870148
57	2	59	0.0001	0.351275															57	2	59	0.0001	0.592684
58	1	59	0.0001	1.29459															58	1	59	0.0001	1.1378
59	3	59	0.0001	0.344902															59	3	59	0.0001	0.587284
60	3	59	0.0001	0.074451															60	3	59	0.0001	0.272857
61	3	59	0.0001	0.283137															61	3	59	0.0001	0.532106
62	2	59	0.0001	0.297078															62	2	59	0.0001	0.545049
63	1	59	0.0001	0.918569															63	1	59	0.0001	0.95842
64	1	59	0.0001	1.59825															64	1	59	0.0001	1.26422
65	2	59	0.0001	0.468392															65	2	59	0.0001	0.684392
66	2	59	0.0001	1.88031															66	2	59	0.0001	1.37125
67	2	59	0.0001	0.602294															67	2	59	0.0001	0.776076
68	3	59	0.0001	0.757765															68	3	59	0.0001	0.870497
69	3	59	0.0001	0.204706															69	3	59	0.0001	0.452444
70	2	59	0.0001	1.17802															70	2	59	0.0001	1.08537
71	1	59	0.0001	0.712843															71	1	59	0.0001	0.8443
72	2	64	0.0001	0.569373															72	2	64	0.0001	0.754568
73	2	64	0.0001	0.606098															73	2	64	0.0001	0.778523
74	2	64	0.0001	0.0921569															74	2	64	0.0001	0.303573
75	2	64	0.0001	0.891137															75	2	64	0.0001	0.944001
76	1	64	0.0001	1.35553															76	1	64	0.0001	1.16427
77	2	64	0.0001	0.523882															77	2	64	0.0001	0.723797
78	2	64	0.0001	1.03049															78	2	64	0.0001	1.01513
79	2	64	0.0001	0.222706															79	2	64	0.0001	0.471917
80	2	64	0.0001	0.211784															80	2	64	0.0001	0.4602
81	1	64	0.0001	0.172569															81	1	64	0.0001	0.415414
82	3	64	0.0001	0.170627															82	3	64	0.0001	0.413071
83	2	64	0.0001	0.768745															83	2	64	0.0001	0.876781
84	3	64	0.0001	0.326059															84	3	64	0.0001	0.571016
85	1	64	0.0001	1.68276															85	1	64	0.0001	1.29721
86	2	64	0.0001	0.30249															86	2	64	0.0001	0.549991
87	2	64	0.0001	0.772529															87	2	64	0.0001	0.878937
88	2	64	0.0001	1.61408															88	2	64	0.0001	1.27046
89	2	64	0.0001	0.868353															89	2	64	0.0001	0.931855
90	2	64	0.0001	0.313471															90	2	64	0.0001	0.559884
91	2	64	0.0001	0.536373															91	2	64	0.0001	0.732375
92	1	64	0.0001	1.49896															92	1	64	0.0001	1.22432
93	2	64	0.0001	0.753216															93	2	64	0.0001	0.86788
94	1	64	0.0001	0.752863															94	1	64	0.0001	0.867677
95	2	64	0.0001	0.157961															95	2	64	0.0001	0.397443
96	3	64	0.0001	0.448353															96	3	64	0.0001	0.669592
97	3	64	0.0001	0.316804															97	3	64	0.0001	0.562853
98	2	64	0.0001	1.0909															98	2	64	0.0001	1.04446
99	2	64	0.0001	0.565902															99	2	64	0.0001	0.752265
100	2	64	0.0001	0.624686															100	2	64	0.0001	0.790371
101	2	64	0.0001	0.447353															101	2	64	0.0001	0.668844
102	3	64	0.0001	0.129373															102	3	64	0.0001	0.359684
103	2	64	0.0001	0.64402															103	2	64	0.0001	0.802508
104	2	64	0.0001	0.28402															104	2	64	0.0001	0.532935
105	2	64	0.0001	0.521725															105	2	64	0.0001	0.722306
106	2	71	0.0001	1.2469															106	2	71	0.0001	1.11665
107	1	71	0.0001	0.892471															107	1	71	0.0001	0.944707
108	1	71	0.0001	1.29345															108	1	71	0.0001	1.1373
109	2	71	0.0001	1.35404															109	2	71	0.0001	1.16363
110	1	71	0.0001	2.30039															110	1	71	0.0001	1.5167
111	2	71	0.0001	1.35361															111	2	71	0.0001	1.16345
112	3	71	0.0001	1.11773															112	3	71	0.0001	1.05723
113	2	71	0.0001	2.12014															113	2	71	0.0001	1.45607
114	2	71	0.0001	0.632196															114	2	71	0.0001	0.795108
115	1	71	0.0001	1.05447															115	1	71	0.0001	1.02687
116	1	71	0.0001	0.914569															116	1	71	0.0001	0.956331
117	2	71	0.0001	1.51498															117	2	71	0.0001	1.23085
118	2	71	0.0001	0.449627															118	2	71	0.0001	0.670543
119	2	71	0.0001	2.66814															119	2	71	0.0001	1.63344
120	3	71	0.0001	0.783196															120	3	71	0.0001	0.884984
121	2	71	0.0001	0.362745															121	2	71	0.0001	0.602283
122	2	71	0.0001	3.10445															122	2	71	0.0001	1.76195
123	2	71	0.0001	1.99278															123	2	71	0.0001	1.41166
124	1	71	0.0001	2.10716															124	1	71	0.0001	1.4516
125	3	71	0.0001	0.532941															125	3	71	0.0001	0.730028
126	2	71	0.0001	2.20443															126	2	71	0.0001	1.48473
127	3	71	0.0001	0.354961															127	3	71	0.0001	0.595786
128	1	71	0.0001	1.77031															128	1	71	0.0001	1.33053
129	2	71	0.0001	0.324137															129	2	71	0.0001	0.569331
130	2	71	0.0001	2.27959															130	2	71	0.0001	1.50983
41	2	59	0.001	5.73312															41	2	59	0.001	2.39439
42	2	59	0.001	3.4342															42	2	59	0.001	1.85316
43	3	59	0.001	0.644275															43	3	59	0.001	0.802667
44	1	59	0.001	1.89971															44	1	59	0.001	1.3783
45	3	59	0.001	2.97963															45	3	59	0.001	1.72616
46	2	59	0.001	1.656															46	2	59	0.001	1.28686
47	2	59	0.001	1.74602															47	2	59	0.001	1.32137
48	1	59	0.001	4.41225															48	1	59	0.001	2.10054
49	2	59	0.001	2.02655															49	2	59	0.001	1.42357
50	2	59	0.001	7.26627															50	2	59	0.001	2.6956
51	1	59	0.001	2.53665															51	1	59	0.001	1.59269
52	2	59	0.001	3.402															52	2	59	0.001	1.84445
53	2	59	0.001	2.80098															53	2	59	0.001	1.67361
54	3	59	0.001	2.47678															54	3	59	0.001	1.57378
55	3	59	0.001	0.629765															55	3	59	0.001	0.793577
56	2	59	0.001	3.53467															56	2	59	0.001	1.88007
57	2	59	0.001	2.68967															57	2	59	0.001	1.64002
58	1	59	0.001	2.97596															58	1	59	0.001	1.7251
59	3	59	0.001	1.96898															59	3	59	0.001	1.4032
60	3	59	0.001	1.78602															60	3	59	0.001	1.33642
61	3	59	0.001	0.289216															61	3	59	0.001	0.537788
62	2	59	0.001	0.346078															62	2	59	0.001	0.588284
63	1	59	0.001	3.20045															63	1	59	0.001	1.78898
64	1	59	0.001	5.17433															64	1	59	0.001	2.27472
65	2	59	0.001	2.77494															65	2	59	0.001	1.66582
66	2	59	0.001	4.22045															66	2	59	0.001	2.05437
67	2	59	0.001	4.34075															67	2	59	0.001	2.08345
68	3	59	0.001	2.73941															68	3	59	0.001	1.65512
69	3	59	0.001	1.59008															69	3	59	0.001	1.26098
70	2	59	0.001	4.10006															70	2	59	0.001	2.02486
71	1	59	0.001	2.7489															71	1	59	0.001	1.65798
72	2	64	0.001	4.50431															72	2	64	0.001	2.12234
73	2	64	0.001	2.3979															73	2	64	0.001	1.54852
74	2	64	0.001	1.55202															74	2	64	0.001	1.2458
75	2	64	0.001	2.66051															75	2	64	0.001	1.63111
76	1	64	0.001	4.09612															76	1	64	0.001	2.02389
77	2	64	0.001	2.36902															77	2	64	0.001	1.53916
78	2	64	0.001	4.77851															78	2	64	0.001	2.18598
79	2	64	0.001	0.448275															79	2	64	0.001	0.669533
80	2	64	0.001	0.844098															80	2	64	0.001	0.918748
81	1	64	0.001	1.52616															81	1	64	0.001	1.23538
82	3	64	0.001	0.152471															82	3	64	0.001	0.390475
83	2	64	0.001	3.11751															83	2	64	0.001	1.76565
84	3	64	0.001	1.61727															84	3	64	0.001	1.27172
85	1	64	0.001	7.74518															85	1	64	0.001	2.78302
86	2	64	0.001	3.09259															86	2	64	0.001	1.75858
87	2	64	0.001	3.88773															87	2	64	0.001	1.97173
88	2	64	0.001	3.68767															88	2	64	0.001	1.92033
89	2	64	0.001	3.33322															89	2	64	0.001	1.82571
90	2	64	0.001	1.72998															90	2	64	0.001	1.31529
91	2	64	0.001	2.42802															91	2	64	0.001	1.55821
92	1	64	0.001	4.79543															92	1	64	0.001	2.18985
93	2	64	0.001	3.71861															93	2	64	0.001	1.92837
94	1	64	0.001	2.29729															94	1	64	0.001	1.51568
95	2	64	0.001	1.44967															95	2	64	0.001	1.20402
96	3	64	0.001	1.33751															96	3	64	0.001	1.15651
97	3	64	0.001	0.673431															97	3	64	0.001	0.820629
98	2	64	0.001	2.82143															98	2	64	0.001	1.67971
99	2	64	0.001	2.06729															99	2	64	0.001	1.43781
100	2	64	0.001	2.45822															100	2	64	0.001	1.56787
101	2	64	0.001	1.82276															101	2	64	0.001	1.3501
102	3	64	0.001	0.902098															102	3	64	0.001	0.949788
103	2	64	0.001	1.9891															103	2	64	0.001	1.41035
104	2	64	0.001	2.01331															104	2	64	0.001	1.41891
105	2	64	0.001	0.895235															105	2	64	0.001	0.946169
106	2	71	0.001	4.16424															106	2	71	0.001	2.04065
107	1	71	0.001	3.04584															107	1	71	0.001	1.74523
108	1	71	0.001	3.70841															108	1	71	0.001	1.92572
109	2	71	0.001	4.29259															109	2	71	0.001	2.07186
110	1	71	0.001	4.62696															110	1	71	0.001	2.15104
111	2	71	0.001	3.80533															111	2	71	0.001	1.95073
112	3	71	0.001	3.0842															112	3	71	0.001	1.75619
113	2	71	0.001	6.64867															113	2	71	0.001	2.5785
114	2	71	0.001	2.82598															114	2	71	0.001	1.68107
115	1	71	0.001	2.38592															115	1	71	0.001	1.54464
116	1	71	0.001	2.8799															116	1	71	0.001	1.69703
117	2	71	0.001	3.86945															117	2	71	0.001	1.96709
118	2	71	0.001	1.42408															118	2	71	0.001	1.19335
119	2	71	0.001	6.05502															119	2	71	0.001	2.46069
120	3	71	0.001	2.47684															120	3	71	0.001	1.5738
121	2	71	0.001	1.40225															121	2	71	0.001	1.18417
122	2	71	0.001	4.60388															122	2	71	0.001	2.14567
123	2	71	0.001	5.99355															123	2	71	0.001	2.44817
124	1	71	0.001	5.85439															124	1	71	0.001	2.41959
125	3	71	0.001	2.88996															125	3	71	0.001	1.69999
126	2	71	0.001	5.88565															126	2	71	0.001	2.42604
127	3	71	0.001	0.58702															127	3	71	0.001	0.766172
128	1	71	0.001	6.17431															128	1	71	0.001	2.48482
129	2	71	0.001	0.723431															129	2	71	0.001	0.850548
130	2	71	0.001	7.23671															130	2	71	0.001	2.69011
41	2	59	0.01	13.1776															41	2	59	0.01	3.6301
42	2	59	0.01	9.80535															42	2	59	0.01	3.13135
43	3	59	0.01	1.16857															43	3	59	0.01	1.081
44	1	59	0.01	4.71127															44	1	59	0.01	2.17055
45	3	59	0.01	6.78741															45	3	59	0.01	2.60527
46	2	59	0.01	4.97561															46	2	59	0.01	2.23061
47	2	59	0.01	3.74473															47	2	59	0.01	1.93513
48	1	59	0.01	9.4421															48	1	59	0.01	3.0728
49	2	59	0.01	3.80784															49	2	59	0.01	1.95137
50	2	59	0.01	12.2105															50	2	59	0.01	3.49435
51	1	59	0.01	5.34359															51	1	59	0.01	2.31162
52	2	59	0.01	6.33569															52	2	59	0.01	2.51708
53	2	59	0.01	12.6067															53	2	59	0.01	3.55059
54	3	59	0.01	6.09971															54	3	59	0.01	2.46976
55	3	59	0.01	1.20376															55	3	59	0.01	1.09716
56	2	59	0.01	8.64476															56	2	59	0.01	2.9402
57	2	59	0.01	5.25971															57	2	59	0.01	2.2934
58	1	59	0.01	8.10092															58	1	59	0.01	2.84621
59	3	59	0.01	5.56167															59	3	59	0.01	2.35832
60	3	59	0.01	4.63808															60	3	59	0.01	2.15362
61	3	59	0.01	0.802275															61	3	59	0.01	0.895698
62	2	59	0.01	0.879255															62	2	59	0.01	0.937686
63	1	59	0.01	5.76918															63	1	59	0.01	2.40191
64	1	59	0.01	10.6719															64	1	59	0.01	3.26678
65	2	59	0.01	4.56478															65	2	59	0.01	2.13654
66	2	59	0.01	9.97776															66	2	59	0.01	3.15876
67	2	59	0.01	8.0919															67	2	59	0.01	2.84463
68	3	59	0.01	7.24394															68	3	59	0.01	2.69146
69	3	59	0.01	8.22863															69	3	59	0.01	2.86856
70	2	59	0.01	10.6211															70	2	59	0.01	3.259
71	1	59	0.01	3.86775															71	1	59	0.01	1.96666
72	2	64	0.01	6.98041															72	2	64	0.01	2.64205
73	2	64	0.01	4.18171															73	2	64	0.01	2.04492
74	2	64	0.01	5.72098															74	2	64	0.01	2.39186
75	2	64	0.01	6.43624															75	2	64	0.01	2.53697
76	1	64	0.01	9.50227															76	1	64	0.01	3.08258
77	2	64	0.01	5.78922															77	2	64	0.01	2.40608
78	2	64	0.01	6.35137															78	2	64	0.01	2.52019
79	2	64	0.01	1.7432															79	2	64	0.01	1.3203
80	2	64	0.01	1.33204															80	2	64	0.01	1.15414
81	1	64	0.01	5.17486															81	1	64	0.01	2.27483
82	3	64	0.01	1.03645															82	3	64	0.01	1.01806
83	2	64	0.01	7.46582															83	2	64	0.01	2.73237
84	3	64	0.01	6.71971															84	3	64	0.01	2.59224
85	1	64	0.01	10.2437															85	1	64	0.01	3.20058
86	2	64	0.01	6.14951															86	2	64	0.01	2.47982
87	2	64	0.01	6.96927															87	2	64	0.01	2.63994
88	2	64	0.01	6.67488															88	2	64	0.01	2.58358
89	2	64	0.01	8.99192															89	2	64	0.01	2.99865
90	2	64	0.01	3.50304															90	2	64	0.01	1.87164
91	2	64	0.01	6.03894															91	2	64	0.01	2.45743
92	1	64	0.01	6.11463															92	1	64	0.01	2.47278
93	2	64	0.01	6.76961															93	2	64	0.01	2.60185
94	1	64	0.01	5.06106															94	1	64	0.01	2.24968
95	2	64	0.01	5.18451															95	2	64	0.01	2.27695
96	3	64	0.01	3.3888															96	3	64	0.01	1.84087
97	3	64	0.01	1.02927															97	3	64	0.01	1.01453
98	2	64	0.01	5.45098															98	2	64	0.01	2.33473
99	2	64	0.01	6.65722															99	2	64	0.01	2.58016
100	2	64	0.01	7.78427															100	2	64	0.01	2.79003
101	2	64	0.01	1.25516															101	2	64	0.01	1.12034
102	3	64	0.01	4.2902															102	3	64	0.01	2.07128
103	2	64	0.01	6.29747															103	2	64	0.01	2.50948
104	2	64	0.01	4.68035															104	2	64	0.01	2.16341
105	2	64	0.01	1.56963															105	2	64	0.01	1.25285
106	2	71	0.01	7.96998															106	2	71	0.01	2.82312
107	1	71	0.01	6.1451															107	1	71	0.01	2.47893
108	1	71	0.01	7.63994															108	1	71	0.01	2.76404
109	2	71	0.01	10.5635															109	2	71	0.01	3.25015
110	1	71	0.01	8.86688															110	1	71	0.01	2.97773
111	2	71	0.01	4.7782															111	2	71	0.01	2.18591
112	3	71	0.01	8.31896															112	3	71	0.01	2.88426
113	2	71	0.01	12.1148															113	2	71	0.01	3.48063
114	2	71	0.01	5.9042															114	2	71	0.01	2.42986
115	1	71	0.01	5.37882															115	1	71	0.01	2.31923
116	1	71	0.01	4.66376															116	1	71	0.01	2.15958
117	2	71	0.01	7.37427															117	2	71	0.01	2.71556
118	2	71	0.01	3.79525															118	2	71	0.01	1.94814
119	2	71	0.01	11.1576															119	2	71	0.01	3.3403
120	3	71	0.01	5.93265															120	3	71	0.01	2.4357
121	2	71	0.01	4.3149															121	2	71	0.01	2.07723
122	2	71	0.01	9.53986															122	2	71	0.01	3.08867
123	2	71	0.01	12.8454															123	2	71	0.01	3.58404
124	1	71	0.01	13.6084															124	1	71	0.01	3.68895
125	3	71	0.01	7.31412															125	3	71	0.01	2.70446
126	2	71	0.01	10.9688															126	2	71	0.01	3.31192
127	3	71	0.01	1.42188															127	3	71	0.01	1.19243
128	1	71	0.01	13.5071															128	1	71	0.01	3.67521
129	2	71	0.01	1.57453															129	2	71	0.01	1.2548
130	2	71	0.01	10.9415															130	2	71	0.01	3.30779
41	2	59	0.1	9.47798															41	2	59	0.1	3.07863
42	2	59	0.1	8.77537															42	2	59	0.1	2.96233
43	3	59	0.1	1.12735															43	3	59	0.1	1.06177
44	1	59	0.1	3.26825															44	1	59	0.1	1.80783
45	3	59	0.1	5.62696															45	3	59	0.1	2.37212
46	2	59	0.1	2.99453															46	2	59	0.1	1.73047
47	2	59	0.1	3.82376															47	2	59	0.1	1.95544
48	1	59	0.1	11.9034															48	1	59	0.1	3.45013
49	2	59	0.1	4.5869															49	2	59	0.1	2.14171
50	2	59	0.1	11.4646															50	2	59	0.1	3.38595
51	1	59	0.1	6.15655															51	1	59	0.1	2.48124
52	2	59	0.1	3.88665															52	2	59	0.1	1.97146
53	2	59	0.1	9.56537															53	2	59	0.1	3.09279
54	3	59	0.1	3.44365															54	3	59	0.1	1.85571
55	3	59	0.1	1.41447															55	3	59	0.1	1.18932
56	2	59	0.1	5.111															56	2	59	0.1	2.26075
57	2	59	0.1	5.48557															57	2	59	0.1	2.34213
58	1	59	0.1	10.9353															58	1	59	0.1	3.30686
59	3	59	0.1	4.51435															59	3	59	0.1	2.1247
60	3	59	0.1	6.01073															60	3	59	0.1	2.45168
61	3	59	0.1	0.911529															61	3	59	0.1	0.95474
62	2	59	0.1	2.30706															62	2	59	0.1	1.5189
63	1	59	0.1	6.67571															63	1	59	0.1	2.58374
64	1	59	0.1	9.33125															64	1	59	0.1	3.05471
65	2	59	0.1	3.68696															65	2	59	0.1	1.92015
66	2	59	0.1	11.4366															66	2	59	0.1	3.3818
67	2	59	0.1	7.77396															67	2	59	0.1	2.78818
68	3	59	0.1	5.42302															68	3	59	0.1	2.32874
69	3	59	0.1	8.04233															69	3	59	0.1	2.8359
70	2	59	0.1	16.735															70	2	59	0.1	4.09085
71	1	59	0.1	2.41043															71	1	59	0.1	1.55256
72	2	64	0.1	5.1712															72	2	64	0.1	2.27403
73	2	64	0.1	4.54908															73	2	64	0.1	2.13286
74	2	64	0.1	6.10233															74	2	64	0.1	2.47029
75	2	64	0.1	10.1616															75	2	64	0.1	3.18772
76	1	64	0.1	7.20722															76	1	64	0.1	2.68463
77	2	64	0.1	7.62184															77	2	64	0.1	2.76077
78	2	64	0.1	5.939															78	2	64	0.1	2.43701
79	2	64	0.1	2.00871															79	2	64	0.1	1.41729
80	2	64	0.1	1.11188															80	2	64	0.1	1.05446
81	1	64	0.1	6.50959															81	1	64	0.1	2.55139
82	3	64	0.1	1.04508															82	3	64	0.1	1.02229
83	2	64	0.1	6.10363															83	2	64	0.1	2.47055
84	3	64	0.1	8.68541															84	3	64	0.1	2.9471
85	1	64	0.1	9.0052															85	1	64	0.1	3.00087
86	2	64	0.1	6.21441															86	2	64	0.1	2.49287
87	2	64	0.1	7.59947															87	2	64	0.1	2.75671
88	2	64	0.1	7.5788															88	2	64	0.1	2.75296
89	2	64	0.1	9.02982															89	2	64	0.1	3.00497
90	2	64	0.1	4.10751															90	2	64	0.1	2.0267
91	2	64	0.1	5.68875															91	2	64	0.1	2.38511
92	1	64	0.1	4.234															92	1	64	0.1	2.05767
93	2	64	0.1	6.65504															93	2	64	0.1	2.57974
94	1	64	0.1	6.55															94	1	64	0.1	2.5593
95	2	64	0.1	5.09969															95	2	64	0.1	2.25825
96	3	64	0.1	3.14655															96	3	64	0.1	1.77385
97	3	64	0.1	1.6272															97	3	64	0.1	1.27562
98	2	64	0.1	6.86973															98	2	64	0.1	2.62102
99	2	64	0.1	6.29241															99	2	64	0.1	2.50847
100	2	64	0.1	4.73461															100	2	64	0.1	2.17592
101	2	64	0.1	1.54622															101	2	64	0.1	1.24347
102	3	64	0.1	4.50206															102	3	64	0.1	2.12181
103	2	64	0.1	5.53871															103	2	64	0.1	2.35345
104	2	64	0.1	5.589															104	2	64	0.1	2.36411
105	2	64	0.1	2.69224															105	2	64	0.1	1.6408
106	2	71	0.1	9.09427															106	2	71	0.1	3.01567
107	1	71	0.1	6.57425															107	1	71	0.1	2.56403
108	1	71	0.1	8.18625															108	1	71	0.1	2.86116
109	2	71	0.1	8.39245															109	2	71	0.1	2.89697
110	1	71	0.1	10.1813															110	1	71	0.1	3.19081
111	2	71	0.1	2.67188															111	2	71	0.1	1.63459
112	3	71	0.1	6.30076															112	3	71	0.1	2.51013
113	2	71	0.1	13.0888															113	2	71	0.1	3.61784
114	2	71	0.1	4.14547															114	2	71	0.1	2.03604
115	1	71	0.1	8.27394															115	1	71	0.1	2.87645
116	1	71	0.1	3.37998															116	1	71	0.1	1.83847
117	2	71	0.1	7.41039															117	2	71	0.1	2.7222
118	2	71	0.1	4.02727															118	2	71	0.1	2.00681
119	2	71	0.1	14.061															119	2	71	0.1	3.7498
120	3	71	0.1	6.81376															120	3	71	0.1	2.61032
121	2	71	0.1	3.30353															121	2	71	0.1	1.81756
122	2	71	0.1	11.3862															122	2	71	0.1	3.37435
123	2	71	0.1	14.6645															123	2	71	0.1	3.82943
124	1	71	0.1	13.7279															124	1	71	0.1	3.70512
125	3	71	0.1	5.70037															125	3	71	0.1	2.38755
126	2	71	0.1	12.8999															126	2	71	0.1	3.59164
127	3	71	0.1	1.80661															127	3	71	0.1	1.3441
128	1	71	0.1	16.1408															128	1	71	0.1	4.01756
129	2	71	0.1	1.51402															129	2	71	0.1	1.23046
130	2	71	0.1	17.0415															130	2	71	0.1	4.12813
41	2	59	1	8.355															41	2	59	1	2.8905
42	2	59	1	10.7794															42	2	59	1	3.2832
43	3	59	1	1.13861															43	3	59	1	1.06706
44	1	59	1	1.67933															44	1	59	1	1.29589
45	3	59	1	3.86851															45	3	59	1	1.96685
46	2	59	1	3.86065															46	2	59	1	1.96485
47	2	59	1	3.26635															47	2	59	1	1.80731
48	1	59	1	8.37416															48	1	59	1	2.89381
49	2	59	1	2.42412															49	2	59	1	1.55696
50	2	59	1	7.68214															50	2	59	1	2.77167
51	1	59	1	6.48257															51	1	59	1	2.54609
52	2	59	1	3.0878															52	2	59	1	1.75721
53	2	59	1	6.83914															53	2	59	1	2.61517
54	3	59	1	3.94406															54	3	59	1	1.98597
55	3	59	1	1.43651															55	3	59	1	1.19854
56	2	59	1	3.21533															56	2	59	1	1.79314
57	2	59	1	5.48024															57	2	59	1	2.34099
58	1	59	1	7.22775															58	1	59	1	2.68845
59	3	59	1	3.39804															59	3	59	1	1.84338
60	3	59	1	5.81773															60	3	59	1	2.412
61	3	59	1	0.893941															61	3	59	1	0.945485
62	2	59	1	3.72443															62	2	59	1	1.92988
63	1	59	1	6.90551															63	1	59	1	2.62783
64	1	59	1	12.937															64	1	59	1	3.59681
65	2	59	1	2.86776															65	2	59	1	1.69345
66	2	59	1	18.4076															66	2	59	1	4.29041
67	2	59	1	7.85616															67	2	59	1	2.80288
68	3	59	1	4.07253															68	3	59	1	2.01805
69	3	59	1	5.25559															69	3	59	1	2.29251
70	2	59	1	11.3804															70	2	59	1	3.37349
71	1	59	1	2.26659															71	1	59	1	1.50552
72	2	64	1	4.67296															72	2	64	1	2.1617
73	2	64	1	4.80682															73	2	64	1	2.19245
74	2	64	1	6.45151															74	2	64	1	2.53998
75	2	64	1	5.57212															75	2	64	1	2.36053
76	1	64	1	5.96329															76	1	64	1	2.44199
77	2	64	1	3.13214															77	2	64	1	1.76978
78	2	64	1	5.592															78	2	64	1	2.36474
79	2	64	1	1.54282															79	2	64	1	1.2421
80	2	64	1	0.828275															80	2	64	1	0.910096
81	1	64	1	6.76614															81	1	64	1	2.60118
82	3	64	1	1.50176															82	3	64	1	1.22547
83	2	64	1	3.29073															83	2	64	1	1.81404
84	3	64	1	6.15745															84	3	64	1	2.48142
85	1	64	1	8.43543															85	1	64	1	2.90438
86	2	64	1	6.33427															86	2	64	1	2.5168
87	2	64	1	6.95222															87	2	64	1	2.63671
88	2	64	1	5.76547															88	2	64	1	2.40114
89	2	64	1	8.84424															89	2	64	1	2.97393
90	2	64	1	4.88443															90	2	64	1	2.21007
91	2	64	1	4.35608															91	2	64	1	2.08712
92	1	64	1	1.14471															92	1	64	1	1.06991
93	2	64	1	6.27898															93	2	64	1	2.50579
94	1	64	1	6.47729															94	1	64	1	2.54505
95	2	64	1	4.25733															95	2	64	1	2.06333
96	3	64	1	2.59492															96	3	64	1	1.61088
97	3	64	1	1.64253															97	3	64	1	1.28161
98	2	64	1	5.53441															98	2	64	1	2.35253
99	2	64	1	5.74008															99	2	64	1	2.39585
100	2	64	1	4.18063															100	2	64	1	2.04466
101	2	64	1	2.63653															101	2	64	1	1.62374
102	3	64	1	3.78292															102	3	64	1	1.94497
103	2	64	1	5.20569															103	2	64	1	2.2816
104	2	64	1	6.90669															104	2	64	1	2.62806
105	2	64	1	2.97473															105	2	64	1	1.72474
106	2	71	1	9.05871															106	2	71	1	3.00977
107	1	71	1	7.95143															107	1	71	1	2.81983
108	1	71	1	8.56588															108	1	71	1	2.92675
109	2	71	1	8.07424															109	2	71	1	2.84152
110	1	71	1	11.1362															110	1	71	1	3.3371
111	2	71	1	2.17786															111	2	71	1	1.47576
112	3	71	1	7.41547															112	3	71	1	2.72314
113	2	71	1	13.5476															113	2	71	1	3.68071
114	2	71	1	2.89976															114	2	71	1	1.70287
115	1	71	1	4.56982															115	1	71	1	2.13771
116	1	71	1	3.60875															116	1	71	1	1.89967
117	2	71	1	10.89															117	2	71	1	3.3
118	2	71	1	4.26584															118	2	71	1	2.06539
119	2	71	1	15.0644															119	2	71	1	3.88128
120	3	71	1	6.8141															120	3	71	1	2.61038
121	2	71	1	2.85045															121	2	71	1	1.68833
122	2	71	1	9.18602															122	2	71	1	3.03084
123	2	71	1	17.2483															123	2	71	1	4.1531
124	1	71	1	14.1335															124	1	71	1	3.75946
125	3	71	1	5.66798															125	3	71	1	2.38075
126	2	71	1	12.0214															126	2	71	1	3.46719
127	3	71	1	0.122843															127	3	71	1	0.35049
128	1	71	1	14.1777															128	1	71	1	3.76533
129	2	71	1	1.51573															129	2	71	1	1.23115
130	2	71	1	14.3981															130	2	71	1	3.79449

## Sheet: Fig3B
Fig.3B
fish	genotype	exp	intensity	amplitude		genotype	intensity	variable	n	min	max	median	iqr	mean	sd	se	ci
1	3	91	0.0001	0.741431		1	0.0001	amplitude	50	0.106	4.402	1.268	0.781	1.349	0.837	0.118	0.238
2	2	91	0.0001	1.90867		1	0.001	amplitude	50	0.059	11.048	4.034	2.517	4.183	2.384	0.337	0.678
3	1	91	0.0001	1.28963		1	0.01	amplitude	50	0.291	16.023	7.501	6.032	8.099	4.467	0.632	1.27
4	2	91	0.0001	1.04871		1	0.1	amplitude	50	0.612	18.371	8.531	5.761	8.621	4.955	0.701	1.408
5	2	91	0.0001	1.83112		1	1	amplitude	50	1.03	17.623	7.937	8.256	8.021	4.911	0.695	1.396
6	1	91	0.0001	1.41143		2	0.0001	amplitude	93	0.124	2.616	1.278	0.839	1.219	0.595	0.062	0.123
7	2	91	0.0001	0.207765		2	0.001	amplitude	93	0.178	8.344	4.278	2.513	4.125	1.851	0.192	0.381
8	1	91	0.0001	1.59731		2	0.01	amplitude	93	0.051	15.415	9.135	6.173	8.361	3.879	0.402	0.799
9	2	91	0.0001	0.25651		2	0.1	amplitude	93	0.467	20.466	9.785	5.925	9.001	4.486	0.465	0.924
10	2	91	0.0001	1.46147		2	1	amplitude	93	0.516	15.56	8.888	6.969	8.368	4.325	0.448	0.891
11	1	91	0.0001	0.106392		3	0.0001	amplitude	43	0.086	2.697	1.361	1.022	1.295	0.656	0.1	0.202
12	3	91	0.0001	0.0863137		3	0.001	amplitude	43	0.199	7.411	4.228	2.642	4.194	1.959	0.299	0.603
13	2	91	0.0001	0.132843		3	0.01	amplitude	43	0.082	13.831	8.465	3.867	7.963	3.492	0.533	1.075
14	1	91	0.0001	0.115157		3	0.1	amplitude	43	0.296	17.075	8.919	6.972	9.008	4.575	0.698	1.408
15	3	91	0.0001	0.0934118		3	1	amplitude	43	0.602	17.623	7.462	7.773	8.066	4.581	0.699	1.41
16	2	91	0.0001	0.350118
17	3	91	0.0001	2.21994
18	2	91	0.0001	0.465706
19	3	91	0.0001	0.853412
20	2	91	0.0001	2.02998
21	2	91	0.0001	0.165255
22	2	91	0.0001	0.701882
23	2	91	0.0001	1.8972
24	3	91	0.0001	1.80884
25	1	91	0.0001	1.54704
26	1	91	0.0001	2.59035
27	3	91	0.0001	2.02273
28	2	91	0.0001	0.586843
29	2	91	0.0001	2.04384
30	2	91	0.0001	1.48157
31	2	91	0.0001	1.53618
32	3	91	0.0001	1.11947
33	1	91	0.0001	1.48063
34	1	91	0.0001	1.88553
35	2	98	0.0001	0.367843
36	1	98	0.0001	1.94631
37	2	98	0.0001	1.41888
38	2	98	0.0001	0.587706
39	3	98	0.0001	0.115549
40	2	98	0.0001	2.19608
41	2	98	0.0001	0.527745
42	1	98	0.0001	0.818039
43	1	98	0.0001	1.24671
44	2	98	0.0001	1.92651
45	3	98	0.0001	2.38092
46	2	98	0.0001	0.425549
47	2	98	0.0001	0.451333
48	3	98	0.0001	0.552922
49	1	98	0.0001	4.40182
50	1	98	0.0001	0.146294
51	1	98	0.0001	0.95802
52	1	98	0.0001	1.16912
53	2	98	0.0001	0.139941
54	2	98	0.0001	1.46743
55	1	98	0.0001	1.41273
56	3	98	0.0001	0.588882
57	3	98	0.0001	2.10367
58	3	98	0.0001	1.22784
59	2	98	0.0001	0.875627
60	2	98	0.0001	0.124176
61	1	98	0.0001	0.494569
62	2	98	0.0001	1.49571
63	2	98	0.0001	1.06745
64	2	98	0.0001	1.58957
65	2	98	0.0001	0.428647
66	2	98	0.0001	1.33208
67	1	98	0.0001	0.19298
68	2	98	0.0001	1.098
69	2	98	0.0001	1.30165
70	1	98	0.0001	0.241902
71	3	98	0.0001	0.68151
72	2	98	0.0001	0.57649
73	2	104	0.0001	1.88025
74	2	104	0.0001	0.638667
75	1	104	0.0001	0.608882
76	1	104	0.0001	1.53743
77	2	104	0.0001	1.38631
78	2	104	0.0001	0.820176
79	2	104	0.0001	1.27953
80	3	104	0.0001	1.56994
81	3	104	0.0001	1.82553
82	1	104	0.0001	1.05133
83	3	104	0.0001	1.7761
84	2	104	0.0001	2.05443
85	2	104	0.0001	0.931078
86	1	104	0.0001	1.84584
87	1	104	0.0001	1.05545
88	1	104	0.0001	1.13449
89	2	104	0.0001	0.841588
90	2	104	0.0001	1.12529
91	2	104	0.0001	1.47576
92	3	104	0.0001	2.23973
93	3	104	0.0001	1.36071
94	2	104	0.0001	1.12725
95	1	104	0.0001	2.09465
96	2	104	0.0001	1.68694
97	1	104	0.0001	1.35294
98	2	104	0.0001	1.11739
99	2	104	0.0001	1.88888
100	3	104	0.0001	0.429039
101	2	104	0.0001	1.2869
102	3	104	0.0001	2.6972
103	2	104	0.0001	1.96076
104	2	104	0.0001	1.47124
105	2	104	0.0001	2.04896
106	2	104	0.0001	0.829725
107	2	104	0.0001	1.87453
108	2	104	0.0001	0.421118
109	2	104	0.0001	1.47143
110	3	104	0.0001	0.709078
111	3	104	0.0001	1.24047
112	2	106	0.0001	1.10508
113	2	106	0.0001	0.881745
114	2	106	0.0001	0.713216
115	2	106	0.0001	1.61896
116	1	106	0.0001	2.19837
117	1	106	0.0001	1.09555
118	2	106	0.0001	0.877902
119	2	106	0.0001	1.35796
120	2	106	0.0001	1.34927
121	1	106	0.0001	0.567608
122	3	106	0.0001	1.24418
123	1	106	0.0001	2.72604
124	1	106	0.0001	2.55912
125	3	106	0.0001	1.38976
126	2	106	0.0001	1.03855
127	3	106	0.0001	1.30029
128	2	106	0.0001	2.6162
129	3	106	0.0001	1.86773
130	3	106	0.0001	1.22814
131	1	106	0.0001	1.31314
132	1	106	0.0001	1.67886
133	2	106	0.0001	1.88918
134	2	106	0.0001	2.18394
135	2	106	0.0001	1.9579
136	3	106	0.0001	1.5532
137	3	106	0.0001	0.773412
138	2	106	0.0001	1.53843
139	1	106	0.0001	1.35953
140	2	106	0.0001	0.759569
141	2	106	0.0001	2.10202
142	1	106	0.0001	3.59847
143	3	106	0.0001	1.52447
144	2	106	0.0001	1.40686
145	3	106	0.0001	1.39969
146	2	106	0.0001	0.684373
147	2	106	0.0001	1.27782
148	3	106	0.0001	1.41973
149	1	106	0.0001	1.64571
150	1	109	0.0001	1.01382
151	1	109	0.0001	0.693569
152	2	109	0.0001	2.03847
153	2	109	0.0001	0.89949
154	1	109	0.0001	1.53263
155	3	109	0.0001	1.52461
156	1	109	0.0001	1.18749
157	3	109	0.0001	1.18292
158	2	109	0.0001	1.53306
159	3	109	0.0001	1.78237
160	2	109	0.0001	0.877373
161	2	109	0.0001	1.15953
162	1	109	0.0001	1.20869
163	2	109	0.0001	0.776941
164	1	109	0.0001	1.13339
165	2	109	0.0001	1.46829
166	2	109	0.0001	0.821922
167	2	109	0.0001	2.56553
168	1	109	0.0001	0.998961
169	2	109	0.0001	1.09488
170	2	109	0.0001	1.24998
171	2	109	0.0001	0.837
172	3	109	0.0001	1.36071
173	3	109	0.0001	1.57927
174	3	109	0.0001	0.580941
175	1	109	0.0001	1.83025
176	3	109	0.0001	1.3211
177	2	109	0.0001	1.70443
178	1	109	0.0001	1.57073
179	2	109	0.0001	1.44578
180	1	109	0.0001	0.518255
181	1	109	0.0001	0.560039
182	1	109	0.0001	0.74098
183	3	109	0.0001	0.0878824
184	2	109	0.0001	1.63173
185	2	109	0.0001	0.779667
186	3	109	0.0001	2.10033
1	3	91	0.001	2.902
2	2	91	0.001	7.81041
3	1	91	0.001	3.93543
4	2	91	0.001	4.61857
5	2	91	0.001	5.70739
6	1	91	0.001	4.25086
7	2	91	0.001	1.10035
8	1	91	0.001	4.93235
9	2	91	0.001	1.25369
10	2	91	0.001	5.12496
11	1	91	0.001	0.212471
12	3	91	0.001	0.236275
13	2	91	0.001	0.371667
14	1	91	0.001	0.137941
15	3	91	0.001	0.198745
16	2	91	0.001	0.17849
17	3	91	0.001	6.28953
18	2	91	0.001	1.03935
19	3	91	0.001	7.41075
20	2	91	0.001	5.94608
21	2	91	0.001	0.561
22	2	91	0.001	2.9508
23	2	91	0.001	6.04059
24	3	91	0.001	4.42755
25	1	91	0.001	2.97737
26	1	91	0.001	8.01671
27	3	91	0.001	6.69571
28	2	91	0.001	2.44202
29	2	91	0.001	5.81694
30	2	91	0.001	4.89976
31	2	91	0.001	4.45351
32	3	91	0.001	3.32433
33	1	91	0.001	5.77202
34	1	91	0.001	5.63106
35	2	98	0.001	2.22006
36	1	98	0.001	4.62206
37	2	98	0.001	3.81173
38	2	98	0.001	2.55725
39	3	98	0.001	0.553941
40	2	98	0.001	8.34447
41	2	98	0.001	2.57712
42	1	98	0.001	3.80896
43	1	98	0.001	5.48635
44	2	98	0.001	6.00025
45	3	98	0.001	6.66239
46	2	98	0.001	1.02788
47	2	98	0.001	2.12257
48	3	98	0.001	2.23669
49	1	98	0.001	11.0482
50	1	98	0.001	0.479549
51	1	98	0.001	3.73855
52	1	98	0.001	3.49145
53	2	98	0.001	2.69029
54	2	98	0.001	4.70408
55	1	98	0.001	3.62788
56	3	98	0.001	2.10239
57	3	98	0.001	6.2491
58	3	98	0.001	4.36437
59	2	98	0.001	3.84794
60	2	98	0.001	0.547471
61	1	98	0.001	2.04122
62	2	98	0.001	5.05527
63	2	98	0.001	4.27078
64	2	98	0.001	4.31775
65	2	98	0.001	0.758588
66	2	98	0.001	4.84176
67	1	98	0.001	0.561784
68	2	98	0.001	3.57196
69	2	98	0.001	2.87996
70	1	98	0.001	0.771745
71	3	98	0.001	2.22151
72	2	98	0.001	1.8918
73	2	104	0.001	5.60992
74	2	104	0.001	1.59357
75	1	104	0.001	3.12557
76	1	104	0.001	6.32676
77	2	104	0.001	5.02851
78	2	104	0.001	2.22249
79	2	104	0.001	5.60127
80	3	104	0.001	5.21533
81	3	104	0.001	5.6041
82	1	104	0.001	2.26261
83	3	104	0.001	5.00094
84	2	104	0.001	4.81647
85	2	104	0.001	2.87116
86	1	104	0.001	7.58947
87	1	104	0.001	4.89327
88	1	104	0.001	4.92665
89	2	104	0.001	3.51335
90	2	104	0.001	4.22616
91	2	104	0.001	5.18831
92	3	104	0.001	6.38937
93	3	104	0.001	4.18284
94	2	104	0.001	4.07682
95	1	104	0.001	6.00524
96	2	104	0.001	5.08367
97	1	104	0.001	3.9869
98	2	104	0.001	4.25018
99	2	104	0.001	5.31067
100	3	104	0.001	2.47737
101	2	104	0.001	4.56837
102	3	104	0.001	7.29865
103	2	104	0.001	6.29149
104	2	104	0.001	6.35155
105	2	104	0.001	6.34337
106	2	104	0.001	3.21988
107	2	104	0.001	6.09061
108	2	104	0.001	1.73127
109	2	104	0.001	4.47086
110	3	104	0.001	2.86465
111	3	104	0.001	2.91622
112	2	106	0.001	4.40386
113	2	106	0.001	2.50561
114	2	106	0.001	5.54514
115	2	106	0.001	3.91886
116	1	106	0.001	6.38173
117	1	106	0.001	3.41225
118	2	106	0.001	3.01563
119	2	106	0.001	5.12661
120	2	106	0.001	4.19463
121	1	106	0.001	1.87622
122	3	106	0.001	4.04639
123	1	106	0.001	8.14692
124	1	106	0.001	7.43416
125	3	106	0.001	4.78918
126	2	106	0.001	2.9521
127	3	106	0.001	2.38806
128	2	106	0.001	7.10227
129	3	106	0.001	6.40147
130	3	106	0.001	4.48194
131	1	106	0.001	4.00196
132	1	106	0.001	5.155
133	2	106	0.001	7.7351
134	2	106	0.001	7.30808
135	2	106	0.001	5.38431
136	3	106	0.001	5.39371
137	3	106	0.001	4.16586
138	2	106	0.001	5.38531
139	1	106	0.001	5.07188
140	2	106	0.001	2.90896
141	2	106	0.001	6.26451
142	1	106	0.001	9.69212
143	3	106	0.001	3.98406
144	2	106	0.001	5.27237
145	3	106	0.001	3.29435
146	2	106	0.001	1.71663
147	2	106	0.001	3.82206
148	3	106	0.001	4.75157
149	1	106	0.001	4.30633
150	1	109	0.001	3.46208
151	1	109	0.001	1.56216
152	2	109	0.001	5.41888
153	2	109	0.001	2.78727
154	1	109	0.001	4.06704
155	3	109	0.001	4.21749
156	1	109	0.001	4.68145
157	3	109	0.001	3.64559
158	2	109	0.001	5.12778
159	3	109	0.001	5.9169
160	2	109	0.001	2.73024
161	2	109	0.001	4.04827
162	1	109	0.001	4.70045
163	2	109	0.001	3.24316
164	1	109	0.001	2.85678
165	2	109	0.001	5.10331
166	2	109	0.001	4.76192
167	2	109	0.001	7.74931
168	1	109	0.001	3.11337
169	2	109	0.001	3.41312
170	2	109	0.001	4.32871
171	2	109	0.001	3.96282
172	3	109	0.001	5.44575
173	3	109	0.001	5.32949
174	3	109	0.001	2.35514
175	1	109	0.001	4.27427
176	3	109	0.001	4.22812
177	2	109	0.001	6.19541
178	1	109	0.001	5.60761
179	2	109	0.001	4.27835
180	1	109	0.001	0.0593137
181	1	109	0.001	1.85108
182	1	109	0.001	2.77463
183	3	109	0.001	0.310941
184	2	109	0.001	6.16271
185	2	109	0.001	2.95469
186	3	109	0.001	7.38545
1	3	91	0.01	6.58822
2	2	91	0.01	9.69224
3	1	91	0.01	7.05953
4	2	91	0.01	9.82927
5	2	91	0.01	8.97292
6	1	91	0.01	7.30322
7	2	91	0.01	2.51475
8	1	91	0.01	10.222
9	2	91	0.01	3.48359
10	2	91	0.01	12.8194
11	1	91	0.01	1.62365
12	3	91	0.01	0.187667
13	2	91	0.01	2.8461
14	1	91	0.01	0.290941
15	3	91	0.01	0.0824118
16	2	91	0.01	0.0505686
17	3	91	0.01	7.34902
18	2	91	0.01	1.23104
19	3	91	0.01	3.45951
20	2	91	0.01	12.1869
21	2	91	0.01	2.14582
22	2	91	0.01	3.19218
23	2	91	0.01	12.2112
24	3	91	0.01	7.21437
25	1	91	0.01	5.56037
26	1	91	0.01	14.1052
27	3	91	0.01	6.9911
28	2	91	0.01	4.46992
29	2	91	0.01	11.3489
30	2	91	0.01	12.8786
31	2	91	0.01	3.81753
32	3	91	0.01	11.0966
33	1	91	0.01	15.6865
34	1	91	0.01	15.7283
35	2	98	0.01	2.07035
36	1	98	0.01	7.165
37	2	98	0.01	6.7378
38	2	98	0.01	3.67761
39	3	98	0.01	1.29702
40	2	98	0.01	14.4691
41	2	98	0.01	8.78418
42	1	98	0.01	7.2838
43	1	98	0.01	9.25218
44	2	98	0.01	8.3142
45	3	98	0.01	10.2805
46	2	98	0.01	1.24747
47	2	98	0.01	7.52351
48	3	98	0.01	5.89724
49	1	98	0.01	14.7457
50	1	98	0.01	0.972039
51	1	98	0.01	8.06818
52	1	98	0.01	6.17376
53	2	98	0.01	0.661725
54	2	98	0.01	9.38943
55	1	98	0.01	9.02067
56	3	98	0.01	4.784
57	3	98	0.01	12.2193
58	3	98	0.01	9.72963
59	2	98	0.01	10.1193
60	2	98	0.01	1.05851
61	1	98	0.01	3.4621
62	2	98	0.01	13.3112
63	2	98	0.01	6.92314
64	2	98	0.01	5.45398
65	2	98	0.01	1.71339
66	2	98	0.01	12.899
67	1	98	0.01	0.986882
68	2	98	0.01	7.7488
69	2	98	0.01	4.42016
70	1	98	0.01	1.08855
71	3	98	0.01	6.49278
72	2	98	0.01	6.03088
73	2	104	0.01	14.0735
74	2	104	0.01	4.21957
75	1	104	0.01	9.03235
76	1	104	0.01	9.45945
77	2	104	0.01	8.57982
78	2	104	0.01	3.25169
79	2	104	0.01	11.5988
80	3	104	0.01	10.4575
81	3	104	0.01	10.5567
82	1	104	0.01	3.02773
83	3	104	0.01	9.88945
84	2	104	0.01	9.97373
85	2	104	0.01	7.3749
86	1	104	0.01	14.1383
87	1	104	0.01	12.7615
88	1	104	0.01	7.23633
89	2	104	0.01	4.99096
90	2	104	0.01	9.97896
91	2	104	0.01	10.7872
92	3	104	0.01	12.0332
93	3	104	0.01	10.208
94	2	104	0.01	7.89739
95	1	104	0.01	11.6954
96	2	104	0.01	10.5906
97	1	104	0.01	8.41394
98	2	104	0.01	9.13112
99	2	104	0.01	10.1877
100	3	104	0.01	5.7421
101	2	104	0.01	11.1048
102	3	104	0.01	13.8308
103	2	104	0.01	14.4475
104	2	104	0.01	14.3561
105	2	104	0.01	12.4138
106	2	104	0.01	6.76833
107	2	104	0.01	11.0343
108	2	104	0.01	3.70527
109	2	104	0.01	10.3625
110	3	104	0.01	8.12847
111	3	104	0.01	3.41935
112	2	106	0.01	9.24965
113	2	106	0.01	5.02547
114	2	106	0.01	12.5287
115	2	106	0.01	7.86778
116	1	106	0.01	8.76355
117	1	106	0.01	6.83324
118	2	106	0.01	6.37722
119	2	106	0.01	10.6339
120	2	106	0.01	9.45541
121	1	106	0.01	2.87516
122	3	106	0.01	7.44959
123	1	106	0.01	16.0231
124	1	106	0.01	14.2273
125	3	106	0.01	11.5201
126	2	106	0.01	4.09847
127	3	106	0.01	7.41827
128	2	106	0.01	13.326
129	3	106	0.01	12.8738
130	3	106	0.01	8.47229
131	1	106	0.01	7.69873
132	1	106	0.01	13.3534
133	2	106	0.01	15.4153
134	2	106	0.01	14.2935
135	2	106	0.01	9.18233
136	3	106	0.01	11.0546
137	3	106	0.01	6.59398
138	2	106	0.01	11.5557
139	1	106	0.01	10.2666
140	2	106	0.01	5.13439
141	2	106	0.01	11.7287
142	1	106	0.01	15.8016
143	3	106	0.01	9.75939
144	2	106	0.01	10.5974
145	3	106	0.01	6.62216
146	2	106	0.01	4.14786
147	2	106	0.01	8.18029
148	3	106	0.01	9.97665
149	1	106	0.01	8.46759
150	1	109	0.01	6.69492
151	1	109	0.01	2.29882
152	2	109	0.01	10.3248
153	2	109	0.01	7.80375
154	1	109	0.01	8.72357
155	3	109	0.01	8.46461
156	1	109	0.01	7.24351
157	3	109	0.01	7.78133
158	2	109	0.01	9.79302
159	3	109	0.01	11.6922
160	2	109	0.01	6.33965
161	2	109	0.01	9.13459
162	1	109	0.01	11.9243
163	2	109	0.01	9.78494
164	1	109	0.01	4.75449
165	2	109	0.01	11.5376
166	2	109	0.01	10.3958
167	2	109	0.01	15.0539
168	1	109	0.01	7.11002
169	2	109	0.01	6.26663
170	2	109	0.01	9.92606
171	2	109	0.01	11.3507
172	3	109	0.01	12.7577
173	3	109	0.01	8.5751
174	3	109	0.01	3.63704
175	1	109	0.01	7.24696
176	3	109	0.01	10.3569
177	2	109	0.01	13.3345
178	1	109	0.01	12.9738
179	2	109	0.01	6.38322
180	1	109	0.01	0.979039
181	1	109	0.01	3.88157
182	1	109	0.01	5.22208
183	3	109	0.01	0.929843
184	2	109	0.01	11.3074
185	2	109	0.01	6.93094
186	3	109	0.01	8.54845
1	3	91	0.1	4.58598
2	2	91	0.1	11.7035
3	1	91	0.1	5.90359
4	2	91	0.1	11.1075
5	2	91	0.1	7.52392
6	1	91	0.1	8.572
7	2	91	0.1	1.94031
8	1	91	0.1	8.0559
9	2	91	0.1	3.3939
10	2	91	0.1	10.5065
11	1	91	0.1	4.60631
12	3	91	0.1	1.59967
13	2	91	0.1	6.83351
14	1	91	0.1	1.4062
15	3	91	0.1	0.296431
16	2	91	0.1	0.46702
17	3	91	0.1	10.0804
18	2	91	0.1	1.08247
19	3	91	0.1	7.22447
20	2	91	0.1	12.7905
21	2	91	0.1	1.71759
22	2	91	0.1	5.15247
23	2	91	0.1	14.8267
24	3	91	0.1	5.72935
25	1	91	0.1	6.02992
26	1	91	0.1	13.5995
27	3	91	0.1	8.32796
28	2	91	0.1	8.12227
29	2	91	0.1	13.3491
30	2	91	0.1	11.3626
31	2	91	0.1	6.22753
32	3	91	0.1	7.62612
33	1	91	0.1	11.1106
34	1	91	0.1	10.0695
35	2	98	0.1	2.03831
36	1	98	0.1	7.47661
37	2	98	0.1	7.00065
38	2	98	0.1	3.36747
39	3	98	0.1	1.25522
40	2	98	0.1	13.1136
41	2	98	0.1	10.0799
42	1	98	0.1	9.18447
43	1	98	0.1	10.2525
44	2	98	0.1	6.28478
45	3	98	0.1	11.04
46	2	98	0.1	1.66725
47	2	98	0.1	4.14892
48	3	98	0.1	3.98653
49	1	98	0.1	15.3707
50	1	98	0.1	1.22159
51	1	98	0.1	6.8739
52	1	98	0.1	6.58324
53	2	98	0.1	1.2448
54	2	98	0.1	7.8932
55	1	98	0.1	9.76031
56	3	98	0.1	6.11473
57	3	98	0.1	13.9514
58	3	98	0.1	13.1039
59	2	98	0.1	8.22643
60	2	98	0.1	1.53263
61	1	98	0.1	2.0271
62	2	98	0.1	12.0171
63	2	98	0.1	4.56931
64	2	98	0.1	6.4549
65	2	98	0.1	0.918549
66	2	98	0.1	20.4656
67	1	98	0.1	0.611745
68	2	98	0.1	7.00639
69	2	98	0.1	3.16288
70	1	98	0.1	1.48475
71	3	98	0.1	3.74492
72	2	98	0.1	3.56643
73	2	104	0.1	10.3768
74	2	104	0.1	3.21761
75	1	104	0.1	8.4848
76	1	104	0.1	11.2449
77	2	104	0.1	9.77386
78	2	104	0.1	2.86629
79	2	104	0.1	10.4884
80	3	104	0.1	12.3191
81	3	104	0.1	13.5798
82	1	104	0.1	1.72967
83	3	104	0.1	13.2264
84	2	104	0.1	9.78492
85	2	104	0.1	7.07963
86	1	104	0.1	14.2356
87	1	104	0.1	14.1667
88	1	104	0.1	6.25027
89	2	104	0.1	3.24402
90	2	104	0.1	11.5003
91	2	104	0.1	11.2749
92	3	104	0.1	13.9283
93	3	104	0.1	14.4618
94	2	104	0.1	9.2532
95	1	104	0.1	13.0318
96	2	104	0.1	14.6339
97	1	104	0.1	8.48994
98	2	104	0.1	10.4114
99	2	104	0.1	13.1985
100	3	104	0.1	4.00206
101	2	104	0.1	12.1508
102	3	104	0.1	17.0752
103	2	104	0.1	17.8436
104	2	104	0.1	17.0205
105	2	104	0.1	15.9563
106	2	104	0.1	9.66429
107	2	104	0.1	11.0176
108	2	104	0.1	2.17959
109	2	104	0.1	13.6797
110	3	104	0.1	11.6226
111	3	104	0.1	2.86361
112	2	106	0.1	8.22649
113	2	106	0.1	6.39729
114	2	106	0.1	11.8536
115	2	106	0.1	10.4724
116	1	106	0.1	11.0104
117	1	106	0.1	9.98612
118	2	106	0.1	8.20794
119	2	106	0.1	13.3618
120	2	106	0.1	13.1174
121	1	106	0.1	2.06676
122	3	106	0.1	6.20582
123	1	106	0.1	18.3415
124	1	106	0.1	18.3712
125	3	106	0.1	12.6005
126	2	106	0.1	3.8498
127	3	106	0.1	7.31049
128	2	106	0.1	11.2125
129	3	106	0.1	16.5382
130	3	106	0.1	7.16841
131	1	106	0.1	7.04225
132	1	106	0.1	18.0272
133	2	106	0.1	15.5414
134	2	106	0.1	11.8631
135	2	106	0.1	9.27665
136	3	106	0.1	12.4597
137	3	106	0.1	6.32894
138	2	106	0.1	12.6805
139	1	106	0.1	12.1978
140	2	106	0.1	5.00951
141	2	106	0.1	11.6315
142	1	106	0.1	17.969
143	3	106	0.1	7.69647
144	2	106	0.1	13.0528
145	3	106	0.1	8.91871
146	2	106	0.1	4.69808
147	2	106	0.1	11.6065
148	3	106	0.1	11.2325
149	1	106	0.1	6.51133
150	1	109	0.1	10.0051
151	1	109	0.1	2.15933
152	2	109	0.1	13.288
153	2	109	0.1	9.28384
154	1	109	0.1	9.76596
155	3	109	0.1	9.64776
156	1	109	0.1	10.274
157	3	109	0.1	14.1025
158	2	109	0.1	10.3058
159	3	109	0.1	12.7392
160	2	109	0.1	6.31473
161	2	109	0.1	10.6944
162	1	109	0.1	12.6963
163	2	109	0.1	10.1813
164	1	109	0.1	3.41431
165	2	109	0.1	12.9905
166	2	109	0.1	11.3914
167	2	109	0.1	13.6775
168	1	109	0.1	9.90061
169	2	109	0.1	9.25516
170	2	109	0.1	11.4013
171	2	109	0.1	15.0385
172	3	109	0.1	14.4792
173	3	109	0.1	12.7236
174	3	109	0.1	3.2372
175	1	109	0.1	5.29914
176	3	109	0.1	13.0495
177	2	109	0.1	15.8679
178	1	109	0.1	15.4455
179	2	109	0.1	6.62886
180	1	109	0.1	0.785412
181	1	109	0.1	3.52412
182	1	109	0.1	8.43439
183	3	109	0.1	1.11673
184	2	109	0.1	13.1208
185	2	109	0.1	6.09237
186	3	109	0.1	8.05996
1	3	91	1	3.44039
2	2	91	1	9.58688
3	1	91	1	4.51041
4	2	91	1	10.1228
5	2	91	1	5.64761
6	1	91	1	3.63367
7	2	91	1	1.52347
8	1	91	1	8.33943
9	2	91	1	1.6218
10	2	91	1	11.1792
11	1	91	1	5.9382
12	3	91	1	1.93604
13	2	91	1	7.7819
14	1	91	1	2.54188
15	3	91	1	0.602392
16	2	91	1	0.83
17	3	91	1	9.66584
18	2	91	1	2.20094
19	3	91	1	6.83437
20	2	91	1	12.8533
21	2	91	1	1.33059
22	2	91	1	6.42978
23	2	91	1	12.0905
24	3	91	1	3.46255
25	1	91	1	5.63402
26	1	91	1	12.8303
27	3	91	1	7.46249
28	2	91	1	14.9917
29	2	91	1	9.40653
30	2	91	1	12.2966
31	2	91	1	7.13165
32	3	91	1	3.76073
33	1	91	1	11.6189
34	1	91	1	16.1288
35	2	98	1	2.65208
36	1	98	1	9.09596
37	2	98	1	6.77082
38	2	98	1	3.15945
39	3	98	1	1.2478
40	2	98	1	12.3981
41	2	98	1	10.7194
42	1	98	1	6.36455
43	1	98	1	10.6512
44	2	98	1	5.06669
45	3	98	1	11.9177
46	2	98	1	1.44751
47	2	98	1	3.34618
48	3	98	1	4.89669
49	1	98	1	17.5218
50	1	98	1	1.31284
51	1	98	1	6.19453
52	1	98	1	7.19812
53	2	98	1	1.18496
54	2	98	1	5.90084
55	1	98	1	9.19584
56	3	98	1	2.90751
57	3	98	1	10.8743
58	3	98	1	6.91884
59	2	98	1	7.88404
60	2	98	1	1.20288
61	1	98	1	1.45225
62	2	98	1	13.2813
63	2	98	1	2.90882
64	2	98	1	5.85363
65	2	98	1	0.515569
66	2	98	1	12.8302
67	1	98	1	1.02992
68	2	98	1	10.1677
69	2	98	1	1.9122
70	1	98	1	1.44418
71	3	98	1	5.00225
72	2	98	1	5.42876
73	2	104	1	8.10643
74	2	104	1	2.87586
75	1	104	1	7.47867
76	1	104	1	9.41241
77	2	104	1	9.47218
78	2	104	1	2.74843
79	2	104	1	7.94818
80	3	104	1	12.4554
81	3	104	1	12.4337
82	1	104	1	1.09518
83	3	104	1	14.1299
84	2	104	1	6.53943
85	2	104	1	3.30131
86	1	104	1	14.0533
87	1	104	1	13.9689
88	1	104	1	4.04055
89	2	104	1	2.04424
90	2	104	1	12.8178
91	2	104	1	11.5756
92	3	104	1	14.105
93	3	104	1	13.2688
94	2	104	1	10.7442
95	1	104	1	14.2799
96	2	104	1	15.5599
97	1	104	1	7.72873
98	2	104	1	12.7164
99	2	104	1	12.5813
100	3	104	1	2.17678
101	2	104	1	11.3837
102	3	104	1	17.6231
103	2	104	1	14.979
104	2	104	1	13.8194
105	2	104	1	9.62918
106	2	104	1	6.03963
107	2	104	1	12.6325
108	2	104	1	1.81606
109	2	104	1	10.9295
110	3	104	1	5.28155
111	3	104	1	1.72167
112	2	106	1	5.10661
113	2	106	1	6.00222
114	2	106	1	8.72602
115	2	106	1	10.3301
116	1	106	1	12.1153
117	1	106	1	8.14555
118	2	106	1	5.85316
119	2	106	1	14.3176
120	2	106	1	13.0444
121	1	106	1	1.55706
122	3	106	1	7.15912
123	1	106	1	14.7365
124	1	106	1	14.8038
125	3	106	1	13.5219
126	2	106	1	3.18718
127	3	106	1	7.0408
128	2	106	1	14.6544
129	3	106	1	16.9321
130	3	106	1	5.42218
131	1	106	1	4.15806
132	1	106	1	13.2204
133	2	106	1	15.2603
134	2	106	1	14.1778
135	2	106	1	10.4255
136	3	106	1	8.78939
137	3	106	1	6.55308
138	2	106	1	10.3469
139	1	106	1	12.6473
140	2	106	1	4.4571
141	2	106	1	12.4839
142	1	106	1	11.2372
143	3	106	1	8.25308
144	2	106	1	13.2972
145	3	106	1	9.46933
146	2	106	1	5.76649
147	2	106	1	12.4592
148	3	106	1	11.8679
149	1	106	1	5.63004
150	1	109	1	10.9534
151	1	109	1	1.58431
152	2	109	1	12.6897
153	2	109	1	10.9103
154	1	109	1	8.25408
155	3	109	1	7.78296
156	1	109	1	10.2652
157	3	109	1	8.24433
158	2	109	1	9.54653
159	3	109	1	13.2798
160	2	109	1	7.91527
161	2	109	1	5.89312
162	1	109	1	13.1632
163	2	109	1	8.88776
164	1	109	1	2.01365
165	2	109	1	12.9352
166	2	109	1	10.3318
167	2	109	1	15.3644
168	1	109	1	5.38606
169	2	109	1	6.35708
170	2	109	1	13.4747
171	2	109	1	6.86322
172	3	109	1	12.8728
173	3	109	1	13.043
174	3	109	1	3.90786
175	1	109	1	2.87304
176	3	109	1	11.4172
177	2	109	1	11.4235
178	1	109	1	17.6229
179	2	109	1	7.885
180	1	109	1	1.39173
181	1	109	1	3.61361
182	1	109	1	11.0011
183	3	109	1	1.04816
184	2	109	1	10.0787
185	2	109	1	5.81463
186	3	109	1	6.08859

## Sheet: Fig3C
Fig.3C																			sqrt-transformed
fish	genotype	exp	intensity	amplitude		genotype	intensity	variable	n	min	max	median	iqr	mean	sd	se	ci		fish	genotype	exp	intensity	amplitude		genotype	intensity	variable	n	min	max	median	iqr	mean	sd	se	ci
plate01_A2	dbKO	202	0.0001	0.174314		WT	0.0001	amplitude	29	0.056	3.16	1.015	1.39	1.231	0.943	0.175	0.359		plate01_A2	dbKO	202	0.0001	0.417509		WT	0.0001	amplitude	29	0.236	1.778	1.007	0.7	1.021	0.441	0.082	0.168
plate01_A3	dbKO	202	0.0001	0.637373		WT	0.001	amplitude	29	0.159	7.208	2.408	3.662	3.433	2.149	0.399	0.817		plate01_A3	dbKO	202	0.0001	0.798356		WT	0.001	amplitude	29	0.399	2.685	1.552	1.003	1.746	0.631	0.117	0.24
plate01_A4	WT	202	0.0001	1.56965		WT	0.01	amplitude	29	0.854	11.05	5.378	5.503	5.825	3.304	0.613	1.257		plate01_A4	WT	202	0.0001	1.25286		WT	0.01	amplitude	29	0.924	3.324	2.319	1.116	2.303	0.736	0.137	0.28
plate01_A5	dbKO	202	0.0001	0.664941		WT	0.1	amplitude	29	1.163	14.169	7.32	4.896	6.991	3.45	0.641	1.312		plate01_A5	dbKO	202	0.0001	0.815439		WT	0.1	amplitude	29	1.078	3.764	2.706	0.92	2.54	0.749	0.139	0.285
plate01_A6	dbKO	202	0.0001	0.878569		WT	1	amplitude	29	0.889	13.728	7.771	5.36	7.225	3.802	0.706	1.446		plate01_A6	dbKO	202	0.0001	0.93732		WT	1	amplitude	29	0.943	3.705	2.788	1.023	2.565	0.818	0.152	0.311
plate01_B1	dbKO	202	0.0001	0.292275		dbKO	0.0001	amplitude	31	0.055	1.797	0.292	0.453	0.444	0.408	0.073	0.15		plate01_B1	dbKO	202	0.0001	0.540624		dbKO	0.0001	amplitude	31	0.234	1.341	0.541	0.375	0.608	0.275	0.049	0.101
plate01_B2	WT	202	0.0001	1.35494		dbKO	0.001	amplitude	31	0.027	5.619	0.754	1.875	1.309	1.397	0.251	0.512		plate01_B2	WT	202	0.0001	1.16402		dbKO	0.001	amplitude	31	0.163	2.37	0.868	0.923	0.999	0.567	0.102	0.208
plate01_B3	dbKO	202	0.0001	0.0825098		dbKO	0.01	amplitude	31	0.044	9.616	1.473	2.846	2.549	2.606	0.468	0.956		plate01_B3	dbKO	202	0.0001	0.287245		dbKO	0.01	amplitude	31	0.211	3.101	1.214	1.054	1.396	0.787	0.141	0.289
plate01_B4	WT	202	0.0001	0.311235		dbKO	0.1	amplitude	31	0.081	13.709	2.03	2.788	3.101	3.013	0.541	1.105		plate01_B4	WT	202	0.0001	0.557885		dbKO	0.1	amplitude	31	0.284	3.703	1.425	0.908	1.579	0.792	0.142	0.291
plate01_B5	WT	202	0.0001	2.81998		dbKO	1	amplitude	31	0.036	14.268	2.218	3.125	3.365	3.18	0.571	1.167		plate01_B5	WT	202	0.0001	1.67928		dbKO	1	amplitude	31	0.19	3.777	1.489	0.976	1.655	0.803	0.144	0.295
plate01_B6	WT	202	0.0001	1.38151															plate01_B6	WT	202	0.0001	1.17538
plate01_C1	dbKO	202	0.0001	0.614118															plate01_C1	dbKO	202	0.0001	0.783657
plate01_C2	dbKO	202	0.0001	0.0547255															plate01_C2	dbKO	202	0.0001	0.233935
plate01_C3	WT	202	0.0001	0.906588															plate01_C3	WT	202	0.0001	0.952149
plate01_C4	dbKO	202	0.0001	0.71151															plate01_C4	dbKO	202	0.0001	0.84351
plate01_C5	WT	202	0.0001	2.56355															plate01_C5	WT	202	0.0001	1.60111
plate01_C6	WT	202	0.0001	0.412843															plate01_C6	WT	202	0.0001	0.642529
plate01_D1	dbKO	202	0.0001	0.582196															plate01_D1	dbKO	202	0.0001	0.763018
plate01_D2	WT	202	0.0001	2.60427															plate01_D2	WT	202	0.0001	1.61378
plate01_D3	WT	202	0.0001	1.84463															plate01_D3	WT	202	0.0001	1.35817
plate01_D4	dbKO	202	0.0001	0.32902															plate01_D4	dbKO	202	0.0001	0.573602
plate01_D5	WT	202	0.0001	1.01451															plate01_D5	WT	202	0.0001	1.00723
plate01_D6	dbKO	202	0.0001	0.660725															plate01_D6	dbKO	202	0.0001	0.81285
plate01_A1	WT	222	0.0001	3.15988															plate01_A1	WT	222	0.0001	1.77761
plate01_A2	WT	222	0.0001	2.22833															plate01_A2	WT	222	0.0001	1.49276
plate01_A3	dbKO	222	0.0001	0.467314															plate01_A3	dbKO	222	0.0001	0.683603
plate01_A4	WT	222	0.0001	1.80253															plate01_A4	WT	222	0.0001	1.34258
plate01_A5	dbKO	222	0.0001	1.58127															plate01_A5	dbKO	222	0.0001	1.25749
plate01_A6	WT	222	0.0001	3.14806															plate01_A6	WT	222	0.0001	1.77428
plate01_B1	dbKO	222	0.0001	1.79704															plate01_B1	dbKO	222	0.0001	1.34054
plate01_B2	dbKO	222	0.0001	0.245961															plate01_B2	dbKO	222	0.0001	0.495944
plate01_B3	WT	222	0.0001	1.01467															plate01_B3	WT	222	0.0001	1.00731
plate01_B4	WT	222	0.0001	0.105608															plate01_B4	WT	222	0.0001	0.324974
plate01_B5	dbKO	222	0.0001	0.159706															plate01_B5	dbKO	222	0.0001	0.399632
plate01_B6	dbKO	222	0.0001	0.539686															plate01_B6	dbKO	222	0.0001	0.734633
plate01_C1	WT	222	0.0001	0.0556078															plate01_C1	WT	222	0.0001	0.235813
plate01_C2	dbKO	222	0.0001	0.244647															plate01_C2	dbKO	222	0.0001	0.494618
plate01_C3	WT	222	0.0001	0.380804															plate01_C3	WT	222	0.0001	0.617093
plate01_C4	dbKO	222	0.0001	0.521451															plate01_C4	dbKO	222	0.0001	0.722116
plate01_C5	dbKO	222	0.0001	0.0999608															plate01_C5	dbKO	222	0.0001	0.316166
plate01_C6	WT	222	0.0001	0.328706															plate01_C6	WT	222	0.0001	0.573329
plate01_D1	dbKO	222	0.0001	0.0658627															plate01_D1	dbKO	222	0.0001	0.256637
plate01_D2	WT	222	0.0001	0.315412															plate01_D2	WT	222	0.0001	0.561615
plate01_A1	dbKO	223	0.0001	0.726039															plate01_A1	dbKO	223	0.0001	0.852079
plate01_A2	WT	223	0.0001	1.51761															plate01_A2	WT	223	0.0001	1.23191
plate01_A3	dbKO	223	0.0001	0.171902															plate01_A3	dbKO	223	0.0001	0.414611
plate01_A4	dbKO	223	0.0001	0.29															plate01_A4	dbKO	223	0.0001	0.538516
plate01_A6	WT	223	0.0001	0.638549															plate01_A6	WT	223	0.0001	0.799093
plate01_B1	dbKO	223	0.0001	0.0594706															plate01_B1	dbKO	223	0.0001	0.243866
plate01_B2	WT	223	0.0001	0.435098															plate01_B2	WT	223	0.0001	0.65962
plate01_B3	dbKO	223	0.0001	0.273529															plate01_B3	dbKO	223	0.0001	0.523
plate01_B4	WT	223	0.0001	0.814902															plate01_B4	WT	223	0.0001	0.902719
plate01_B5	WT	223	0.0001	0.561569															plate01_B5	WT	223	0.0001	0.749379
plate01_C1	WT	223	0.0001	1.14124															plate01_C1	WT	223	0.0001	1.06829
plate01_C2	dbKO	223	0.0001	0.201137															plate01_C2	dbKO	223	0.0001	0.448483
plate01_C4	dbKO	223	0.0001	0.296157															plate01_C4	dbKO	223	0.0001	0.544203
plate01_C5	WT	223	0.0001	0.224471															plate01_C5	WT	223	0.0001	0.473783
plate01_C6	dbKO	223	0.0001	0.242922															plate01_C6	dbKO	223	0.0001	0.492871
plate01_D1	dbKO	223	0.0001	0.0879608															plate01_D1	dbKO	223	0.0001	0.296582
plate01_D2	WT	223	0.0001	1.03361															plate01_D2	WT	223	0.0001	1.01667
plate01_A2	dbKO	202	0.001	0.238686															plate01_A2	dbKO	202	0.001	0.488555
plate01_A3	dbKO	202	0.001	3.03682															plate01_A3	dbKO	202	0.001	1.74265
plate01_A4	WT	202	0.001	5.62341															plate01_A4	WT	202	0.001	2.37137
plate01_A5	dbKO	202	0.001	2.35435															plate01_A5	dbKO	202	0.001	1.53439
plate01_A6	dbKO	202	0.001	2.28978															plate01_A6	dbKO	202	0.001	1.5132
plate01_B1	dbKO	202	0.001	0.788333															plate01_B1	dbKO	202	0.001	0.887881
plate01_B2	WT	202	0.001	3.46786															plate01_B2	WT	202	0.001	1.86222
plate01_B3	dbKO	202	0.001	0.026549															plate01_B3	dbKO	202	0.001	0.162939
plate01_B4	WT	202	0.001	0.664353															plate01_B4	WT	202	0.001	0.815078
plate01_B5	WT	202	0.001	5.66039															plate01_B5	WT	202	0.001	2.37916
plate01_B6	WT	202	0.001	4.35927															plate01_B6	WT	202	0.001	2.08789
plate01_C1	dbKO	202	0.001	2.41518															plate01_C1	dbKO	202	0.001	1.55408
plate01_C2	dbKO	202	0.001	0.222902															plate01_C2	dbKO	202	0.001	0.472125
plate01_C3	WT	202	0.001	1.49494															plate01_C3	WT	202	0.001	1.22268
plate01_C4	dbKO	202	0.001	1.12747															plate01_C4	dbKO	202	0.001	1.06182
plate01_C5	WT	202	0.001	4.53704															plate01_C5	WT	202	0.001	2.13003
plate01_C6	WT	202	0.001	1.06076															plate01_C6	WT	202	0.001	1.02993
plate01_D1	dbKO	202	0.001	2.08806															plate01_D1	dbKO	202	0.001	1.44501
plate01_D2	WT	202	0.001	6.42224															plate01_D2	WT	202	0.001	2.53421
plate01_D3	WT	202	0.001	5.44696															plate01_D3	WT	202	0.001	2.33387
plate01_D4	dbKO	202	0.001	0.455118															plate01_D4	dbKO	202	0.001	0.674624
plate01_D5	WT	202	0.001	2.37059															plate01_D5	WT	202	0.001	1.53967
plate01_D6	dbKO	202	0.001	2.27973															plate01_D6	dbKO	202	0.001	1.50988
plate01_A1	WT	222	0.001	6.78267															plate01_A1	WT	222	0.001	2.60436
plate01_A2	WT	222	0.001	5.23475															plate01_A2	WT	222	0.001	2.28796
plate01_A3	dbKO	222	0.001	1.41094															plate01_A3	dbKO	222	0.001	1.18783
plate01_A4	WT	222	0.001	5.41459															plate01_A4	WT	222	0.001	2.32693
plate01_A5	dbKO	222	0.001	4.9681															plate01_A5	dbKO	222	0.001	2.22892
plate01_A6	WT	222	0.001	7.20808															plate01_A6	WT	222	0.001	2.68479
plate01_B1	dbKO	222	0.001	5.61855															plate01_B1	dbKO	222	0.001	2.37035
plate01_B2	dbKO	222	0.001	0.831098															plate01_B2	dbKO	222	0.001	0.911646
plate01_B3	WT	222	0.001	6.88737															plate01_B3	WT	222	0.001	2.62438
plate01_B4	WT	222	0.001	1.90331															plate01_B4	WT	222	0.001	1.37961
plate01_B5	dbKO	222	0.001	1.09051															plate01_B5	dbKO	222	0.001	1.04427
plate01_B6	dbKO	222	0.001	0.164784															plate01_B6	dbKO	222	0.001	0.405936
plate01_C1	WT	222	0.001	0.448039															plate01_C1	WT	222	0.001	0.669357
plate01_C2	dbKO	222	0.001	0.262549															plate01_C2	dbKO	222	0.001	0.512395
plate01_C3	WT	222	0.001	1.85702															plate01_C3	WT	222	0.001	1.36273
plate01_C4	dbKO	222	0.001	1.60718															plate01_C4	dbKO	222	0.001	1.26774
plate01_C5	dbKO	222	0.001	0.490804															plate01_C5	dbKO	222	0.001	0.700574
plate01_C6	WT	222	0.001	1.98069															plate01_C6	WT	222	0.001	1.40737
plate01_D1	dbKO	222	0.001	0.462902															plate01_D1	dbKO	222	0.001	0.680369
plate01_D2	WT	222	0.001	1.7288															plate01_D2	WT	222	0.001	1.31484
plate01_A1	dbKO	223	0.001	2.98525															plate01_A1	dbKO	223	0.001	1.72779
plate01_A2	WT	223	0.001	4.40424															plate01_A2	WT	223	0.001	2.09863
plate01_A3	dbKO	223	0.001	0.474235															plate01_A3	dbKO	223	0.001	0.688647
plate01_A4	dbKO	223	0.001	0.753745															plate01_A4	dbKO	223	0.001	0.868185
plate01_A6	WT	223	0.001	2.40763															plate01_A6	WT	223	0.001	1.55165
plate01_B1	dbKO	223	0.001	0.0530196															plate01_B1	dbKO	223	0.001	0.23026
plate01_B2	WT	223	0.001	1.75216															plate01_B2	WT	223	0.001	1.32369
plate01_B3	dbKO	223	0.001	0.613373															plate01_B3	dbKO	223	0.001	0.783181
plate01_B4	WT	223	0.001	1.49182															plate01_B4	WT	223	0.001	1.2214
plate01_B5	WT	223	0.001	2.13316															plate01_B5	WT	223	0.001	1.46053
plate01_C1	WT	223	0.001	2.35431															plate01_C1	WT	223	0.001	1.53438
plate01_C2	dbKO	223	0.001	0.732882															plate01_C2	dbKO	223	0.001	0.856085
plate01_C4	dbKO	223	0.001	0.273804															plate01_C4	dbKO	223	0.001	0.523263
plate01_C5	WT	223	0.001	0.159176															plate01_C5	WT	223	0.001	0.398969
plate01_C6	dbKO	223	0.001	0.343961															plate01_C6	dbKO	223	0.001	0.586482
plate01_D1	dbKO	223	0.001	0.124961															plate01_D1	dbKO	223	0.001	0.353498
plate01_D2	WT	223	0.001	4.30586															plate01_D2	WT	223	0.001	2.07506
plate01_A2	dbKO	202	0.01	0.0443725															plate01_A2	dbKO	202	0.01	0.210648
plate01_A3	dbKO	202	0.01	6.45637															plate01_A3	dbKO	202	0.01	2.54094
plate01_A4	WT	202	0.01	10.4616															plate01_A4	WT	202	0.01	3.23444
plate01_A5	dbKO	202	0.01	3.43012															plate01_A5	dbKO	202	0.01	1.85206
plate01_A6	dbKO	202	0.01	3.48314															plate01_A6	dbKO	202	0.01	1.86632
plate01_B1	dbKO	202	0.01	1.42016															plate01_B1	dbKO	202	0.01	1.1917
plate01_B2	WT	202	0.01	5.37847															plate01_B2	WT	202	0.01	2.31915
plate01_B3	dbKO	202	0.01	0.107843															plate01_B3	dbKO	202	0.01	0.328395
plate01_B4	WT	202	0.01	0.927941															plate01_B4	WT	202	0.01	0.963297
plate01_B5	WT	202	0.01	6.18814															plate01_B5	WT	202	0.01	2.4876
plate01_B6	WT	202	0.01	5.9031															plate01_B6	WT	202	0.01	2.42963
plate01_C1	dbKO	202	0.01	3.56594															plate01_C1	dbKO	202	0.01	1.88837
plate01_C2	dbKO	202	0.01	0.0987843															plate01_C2	dbKO	202	0.01	0.3143
plate01_C3	WT	202	0.01	1.36482															plate01_C3	WT	202	0.01	1.16826
plate01_C4	dbKO	202	0.01	0.937118															plate01_C4	dbKO	202	0.01	0.968048
plate01_C5	WT	202	0.01	5.28233															plate01_C5	WT	202	0.01	2.29833
plate01_C6	WT	202	0.01	1.8282															plate01_C6	WT	202	0.01	1.35211
plate01_D1	dbKO	202	0.01	3.71345															plate01_D1	dbKO	202	0.01	1.92703
plate01_D2	WT	202	0.01	9.875															plate01_D2	WT	202	0.01	3.14245
plate01_D3	WT	202	0.01	9.14192															plate01_D3	WT	202	0.01	3.02356
plate01_D4	dbKO	202	0.01	1.27161															plate01_D4	dbKO	202	0.01	1.12766
plate01_D5	WT	202	0.01	2.02994															plate01_D5	WT	202	0.01	1.42476
plate01_D6	dbKO	202	0.01	5.23886															plate01_D6	dbKO	202	0.01	2.28886
plate01_A1	WT	222	0.01	10.2416															plate01_A1	WT	222	0.01	3.20025
plate01_A2	WT	222	0.01	8.4298															plate01_A2	WT	222	0.01	2.90341
plate01_A3	dbKO	222	0.01	2.34425															plate01_A3	dbKO	222	0.01	1.5311
plate01_A4	WT	222	0.01	9.17908															plate01_A4	WT	222	0.01	3.0297
plate01_A5	dbKO	222	0.01	9.55114															plate01_A5	dbKO	222	0.01	3.09049
plate01_A6	WT	222	0.01	11.0098															plate01_A6	WT	222	0.01	3.31811
plate01_B1	dbKO	222	0.01	6.62857															plate01_B1	dbKO	222	0.01	2.5746
plate01_B2	dbKO	222	0.01	1.25322															plate01_B2	dbKO	222	0.01	1.11947
plate01_B3	WT	222	0.01	11.0503															plate01_B3	WT	222	0.01	3.3242
plate01_B4	WT	222	0.01	4.43902															plate01_B4	WT	222	0.01	2.1069
plate01_B5	dbKO	222	0.01	3.19582															plate01_B5	dbKO	222	0.01	1.78769
plate01_B6	dbKO	222	0.01	0.435451															plate01_B6	dbKO	222	0.01	0.659887
plate01_C1	WT	222	0.01	2.10865															plate01_C1	WT	222	0.01	1.45212
plate01_C2	dbKO	222	0.01	1.47302															plate01_C2	dbKO	222	0.01	1.21368
plate01_C3	WT	222	0.01	4.17584															plate01_C3	WT	222	0.01	2.04349
plate01_C4	dbKO	222	0.01	3.99718															plate01_C4	dbKO	222	0.01	1.99929
plate01_C5	dbKO	222	0.01	0.868039															plate01_C5	dbKO	222	0.01	0.931686
plate01_C6	WT	222	0.01	4.04931															plate01_C6	WT	222	0.01	2.01229
plate01_D1	dbKO	222	0.01	1.24237															plate01_D1	dbKO	222	0.01	1.11462
plate01_D2	WT	222	0.01	4.22231															plate01_D2	WT	222	0.01	2.05483
plate01_A1	dbKO	223	0.01	9.61618															plate01_A1	dbKO	223	0.01	3.101
plate01_A2	WT	223	0.01	10.8846															plate01_A2	WT	223	0.01	3.29918
plate01_A3	dbKO	223	0.01	0.667941															plate01_A3	dbKO	223	0.01	0.817277
plate01_A4	dbKO	223	0.01	1.98155															plate01_A4	dbKO	223	0.01	1.40768
plate01_A6	WT	223	0.01	6.23129															plate01_A6	WT	223	0.01	2.49626
plate01_B1	dbKO	223	0.01	0.322961															plate01_B1	dbKO	223	0.01	0.568296
plate01_B2	WT	223	0.01	3.83937															plate01_B2	WT	223	0.01	1.95943
plate01_B3	dbKO	223	0.01	1.47884															plate01_B3	dbKO	223	0.01	1.21608
plate01_B4	WT	223	0.01	3.63859															plate01_B4	WT	223	0.01	1.90751
plate01_B5	WT	223	0.01	5.80735															plate01_B5	WT	223	0.01	2.40985
plate01_C1	WT	223	0.01	3.47025															plate01_C1	WT	223	0.01	1.86286
plate01_C2	dbKO	223	0.01	2.8599															plate01_C2	dbKO	223	0.01	1.69112
plate01_C4	dbKO	223	0.01	0.447118															plate01_C4	dbKO	223	0.01	0.668669
plate01_C5	WT	223	0.01	0.853941															plate01_C5	WT	223	0.01	0.924089
plate01_C6	dbKO	223	0.01	0.207176															plate01_C6	dbKO	223	0.01	0.455166
plate01_D1	dbKO	223	0.01	0.688392															plate01_D1	dbKO	223	0.01	0.829694
plate01_D2	WT	223	0.01	6.90465															plate01_D2	WT	223	0.01	2.62767
plate01_A2	dbKO	202	0.1	0.474294															plate01_A2	dbKO	202	0.1	0.68869
plate01_A3	dbKO	202	0.1	6.67535															plate01_A3	dbKO	202	0.1	2.58367
plate01_A4	WT	202	0.1	9.24031															plate01_A4	WT	202	0.1	3.03979
plate01_A5	dbKO	202	0.1	2.02969															plate01_A5	dbKO	202	0.1	1.42467
plate01_A6	dbKO	202	0.1	3.7382															plate01_A6	dbKO	202	0.1	1.93344
plate01_B1	dbKO	202	0.1	1.42061															plate01_B1	dbKO	202	0.1	1.19189
plate01_B2	WT	202	0.1	6.08335															plate01_B2	WT	202	0.1	2.46645
plate01_B3	dbKO	202	0.1	0.0807843															plate01_B3	dbKO	202	0.1	0.284226
plate01_B4	WT	202	0.1	1.17622															plate01_B4	WT	202	0.1	1.08453
plate01_B5	WT	202	0.1	5.67173															plate01_B5	WT	202	0.1	2.38154
plate01_B6	WT	202	0.1	6.32504															plate01_B6	WT	202	0.1	2.51496
plate01_C1	dbKO	202	0.1	3.65463															plate01_C1	dbKO	202	0.1	1.91171
plate01_C2	dbKO	202	0.1	0.31102															plate01_C2	dbKO	202	0.1	0.557691
plate01_C3	WT	202	0.1	1.16263															plate01_C3	WT	202	0.1	1.07825
plate01_C4	dbKO	202	0.1	1.31514															plate01_C4	dbKO	202	0.1	1.14679
plate01_C5	WT	202	0.1	4.28094															plate01_C5	WT	202	0.1	2.06904
plate01_C6	WT	202	0.1	2.10371															plate01_C6	WT	202	0.1	1.45042
plate01_D1	dbKO	202	0.1	3.43594															plate01_D1	dbKO	202	0.1	1.85363
plate01_D2	WT	202	0.1	7.32033															plate01_D2	WT	202	0.1	2.70561
plate01_D3	WT	202	0.1	9.73663															plate01_D3	WT	202	0.1	3.12036
plate01_D4	dbKO	202	0.1	1.55739															plate01_D4	dbKO	202	0.1	1.24796
plate01_D5	WT	202	0.1	1.57824															plate01_D5	WT	202	0.1	1.25628
plate01_D6	dbKO	202	0.1	4.18994															plate01_D6	dbKO	202	0.1	2.04693
plate01_A1	WT	222	0.1	10.4553															plate01_A1	WT	222	0.1	3.23347
plate01_A2	WT	222	0.1	9.96253															plate01_A2	WT	222	0.1	3.15635
plate01_A3	dbKO	222	0.1	2.64898															plate01_A3	dbKO	222	0.1	1.62757
plate01_A4	WT	222	0.1	10.7875															plate01_A4	WT	222	0.1	3.28443
plate01_A5	dbKO	222	0.1	10.2145															plate01_A5	dbKO	222	0.1	3.19601
plate01_A6	WT	222	0.1	11.9539															plate01_A6	WT	222	0.1	3.45744
plate01_B1	dbKO	222	0.1	4.77802															plate01_B1	dbKO	222	0.1	2.18587
plate01_B2	dbKO	222	0.1	1.56704															plate01_B2	dbKO	222	0.1	1.25181
plate01_B3	WT	222	0.1	9.14022															plate01_B3	WT	222	0.1	3.02328
plate01_B4	WT	222	0.1	6.94184															plate01_B4	WT	222	0.1	2.63474
plate01_B5	dbKO	222	0.1	6.15651															plate01_B5	dbKO	222	0.1	2.48123
plate01_B6	dbKO	222	0.1	0.597059															plate01_B6	dbKO	222	0.1	0.772696
plate01_C1	WT	222	0.1	4.84067															plate01_C1	WT	222	0.1	2.20015
plate01_C2	dbKO	222	0.1	3.10816															plate01_C2	dbKO	222	0.1	1.763
plate01_C3	WT	222	0.1	7.9541															plate01_C3	WT	222	0.1	2.8203
plate01_C4	dbKO	222	0.1	4.75843															plate01_C4	dbKO	222	0.1	2.18138
plate01_C5	dbKO	222	0.1	1.53041															plate01_C5	dbKO	222	0.1	1.2371
plate01_C6	WT	222	0.1	5.98802															plate01_C6	WT	222	0.1	2.44704
plate01_D1	dbKO	222	0.1	3.21294															plate01_D1	dbKO	222	0.1	1.79247
plate01_D2	WT	222	0.1	8.57853															plate01_D2	WT	222	0.1	2.92891
plate01_A1	dbKO	223	0.1	13.7093															plate01_A1	dbKO	223	0.1	3.70261
plate01_A2	WT	223	0.1	14.1689															plate01_A2	WT	223	0.1	3.76416
plate01_A3	dbKO	223	0.1	0.803059															plate01_A3	dbKO	223	0.1	0.896135
plate01_A4	dbKO	223	0.1	3.28337															plate01_A4	dbKO	223	0.1	1.81201
plate01_A6	WT	223	0.1	10.242															plate01_A6	WT	223	0.1	3.20031
plate01_B1	dbKO	223	0.1	1.86569															plate01_B1	dbKO	223	0.1	1.3659
plate01_B2	WT	223	0.1	6.80004															plate01_B2	WT	223	0.1	2.60769
plate01_B3	dbKO	223	0.1	1.04067															plate01_B3	dbKO	223	0.1	1.02013
plate01_B4	WT	223	0.1	7.48129															plate01_B4	WT	223	0.1	2.7352
plate01_B5	WT	223	0.1	9.92222															plate01_B5	WT	223	0.1	3.14995
plate01_C1	WT	223	0.1	3.79906															plate01_C1	WT	223	0.1	1.94912
plate01_C2	dbKO	223	0.1	5.67749															plate01_C2	dbKO	223	0.1	2.38275
plate01_C4	dbKO	223	0.1	0.881588															plate01_C4	dbKO	223	0.1	0.938929
plate01_C5	WT	223	0.1	1.17898															plate01_C5	WT	223	0.1	1.08581
plate01_C6	dbKO	223	0.1	0.112431															plate01_C6	dbKO	223	0.1	0.335308
plate01_D1	dbKO	223	0.1	1.3108															plate01_D1	dbKO	223	0.1	1.1449
plate01_D2	WT	223	0.1	7.85433															plate01_D2	WT	223	0.1	2.80256
plate01_A2	dbKO	202	1	0.922843															plate01_A2	dbKO	202	1	0.960647
plate01_A3	dbKO	202	1	4.81059															plate01_A3	dbKO	202	1	2.19331
plate01_A4	WT	202	1	7.55325															plate01_A4	WT	202	1	2.74832
plate01_A5	dbKO	202	1	1.86963															plate01_A5	dbKO	202	1	1.36734
plate01_A6	dbKO	202	1	2.85535															plate01_A6	dbKO	202	1	1.68978
plate01_B1	dbKO	202	1	1.30324															plate01_B1	dbKO	202	1	1.14159
plate01_B2	WT	202	1	4.42739															plate01_B2	WT	202	1	2.10414
plate01_B3	dbKO	202	1	0.0361765															plate01_B3	dbKO	202	1	0.190201
plate01_B4	WT	202	1	1.0532															plate01_B4	WT	202	1	1.02625
plate01_B5	WT	202	1	4.44596															plate01_B5	WT	202	1	2.10854
plate01_B6	WT	202	1	5.59159															plate01_B6	WT	202	1	2.36465
plate01_C1	dbKO	202	1	2.31994															plate01_C1	dbKO	202	1	1.52314
plate01_C2	dbKO	202	1	0.352353															plate01_C2	dbKO	202	1	0.593593
plate01_C3	WT	202	1	1.14157															plate01_C3	WT	202	1	1.06844
plate01_C4	dbKO	202	1	1.20955															plate01_C4	dbKO	202	1	1.09979
plate01_C5	WT	202	1	3.96288															plate01_C5	WT	202	1	1.9907
plate01_C6	WT	202	1	2.01724															plate01_C6	WT	202	1	1.42029
plate01_D1	dbKO	202	1	3.25806															plate01_D1	dbKO	202	1	1.80501
plate01_D2	WT	202	1	7.77141															plate01_D2	WT	202	1	2.78773
plate01_D3	WT	202	1	8.86127															plate01_D3	WT	202	1	2.97679
plate01_D4	dbKO	202	1	2.21771															plate01_D4	dbKO	202	1	1.4892
plate01_D5	WT	202	1	1.13557															plate01_D5	WT	202	1	1.06563
plate01_D6	dbKO	202	1	2.69278															plate01_D6	dbKO	202	1	1.64097
plate01_A1	WT	222	1	10.7828															plate01_A1	WT	222	1	3.28372
plate01_A2	WT	222	1	9.1458															plate01_A2	WT	222	1	3.0242
plate01_A3	dbKO	222	1	1.86304															plate01_A3	dbKO	222	1	1.36493
plate01_A4	WT	222	1	13.7283															plate01_A4	WT	222	1	3.70518
plate01_A5	dbKO	222	1	9.16241															plate01_A5	dbKO	222	1	3.02695
plate01_A6	WT	222	1	13.2427															plate01_A6	WT	222	1	3.63905
plate01_B1	dbKO	222	1	6.21394															plate01_B1	dbKO	222	1	2.49278
plate01_B2	dbKO	222	1	1.10967															plate01_B2	dbKO	222	1	1.05341
plate01_B3	WT	222	1	8.04875															plate01_B3	WT	222	1	2.83703
plate01_B4	WT	222	1	8.48465															plate01_B4	WT	222	1	2.91284
plate01_B5	dbKO	222	1	8.71324															plate01_B5	dbKO	222	1	2.95182
plate01_B6	dbKO	222	1	0.67302															plate01_B6	dbKO	222	1	0.820378
plate01_C1	WT	222	1	8.01584															plate01_C1	WT	222	1	2.83123
plate01_C2	dbKO	222	1	4.60857															plate01_C2	dbKO	222	1	2.14676
plate01_C3	WT	222	1	11.0405															plate01_C3	WT	222	1	3.32273
plate01_C4	dbKO	222	1	3.78292															plate01_C4	dbKO	222	1	1.94497
plate01_C5	dbKO	222	1	1.26433															plate01_C5	dbKO	222	1	1.12443
plate01_C6	WT	222	1	9.806															plate01_C6	WT	222	1	3.13145
plate01_D1	dbKO	222	1	4.09002															plate01_D1	dbKO	222	1	2.02238
plate01_D2	WT	222	1	12.7109															plate01_D2	WT	222	1	3.56523
plate01_A1	dbKO	223	1	14.2676															plate01_A1	dbKO	223	1	3.77725
plate01_A2	WT	223	1	9.41251															plate01_A2	WT	223	1	3.06798
plate01_A3	dbKO	223	1	1.64925															plate01_A3	dbKO	223	1	1.28423
plate01_A4	dbKO	223	1	2.15112															plate01_A4	dbKO	223	1	1.46667
plate01_A6	WT	223	1	12.3667															plate01_A6	WT	223	1	3.51663
plate01_B1	dbKO	223	1	5.61573															plate01_B1	dbKO	223	1	2.36975
plate01_B2	WT	223	1	6.25498															plate01_B2	WT	223	1	2.501
plate01_B3	dbKO	223	1	0.372784															plate01_B3	dbKO	223	1	0.610561
plate01_B4	WT	223	1	6.01667															plate01_B4	WT	223	1	2.45289
plate01_B5	WT	223	1	9.86798															plate01_B5	WT	223	1	3.14133
plate01_C1	WT	223	1	5.98455															plate01_C1	WT	223	1	2.44633
plate01_C2	dbKO	223	1	8.1571															plate01_C2	dbKO	223	1	2.85606
plate01_C4	dbKO	223	1	1.6379															plate01_C4	dbKO	223	1	1.27981
plate01_C5	WT	223	1	0.889412															plate01_C5	WT	223	1	0.943086
plate01_C6	dbKO	223	1	1.00467															plate01_C6	dbKO	223	1	1.00233
plate01_D1	dbKO	223	1	4.11514															plate01_D1	dbKO	223	1	2.02858
plate01_D2	WT	223	1	5.75925															plate01_D2	WT	223	1	2.39984
