# Supplementary material for: Disturbed retinoid metabolism upon loss of rlbp1a impairs cone function and leads to subretinal lipid deposits and photoreceptor degeneration in the zebrafish retina
Source: eLife. 2021 Oct 20;10:e71473. doi: 10.7554/eLife.71473 (PMC8585484; doi:10.7554/eLife.71473)
Supplement: Figure 4—source data 1. [file elife-71473-fig4-data1.xlsx]

## Sheet: Fig4A
Fig.4A																					sqrt-transformed
fish	genotype	condition	exp	intensity	amplitude		genotype	condition	intensity	variable	n	min	max	median	iqr	mean	sd	se	ci		fish	genotype	condition	exp	intensity	amplitude		genotype	condition	intensity	variable	n	min	max	median	iqr	mean	sd	se	ci
01BL_aKO	rlbp1a-/-	BL	139	0.0001	0.105627		rlbp1a+/+	LA	0.0001	amplitude	15	0.057	0.638	0.298	0.241	0.345	0.176	0.046	0.098		01BL_aKOdmso	rlbp1a-/-	BL	139	0.0001	0.325004		rlbp1a+/+	LA	0.0001	amplitude	15	0.238	0.799	0.546	0.205	0.567	0.158	0.041	0.088
01BL_aKO	rlbp1a-/-	BL	139	0.001	0.161863		rlbp1a+/+	LA	0.001	amplitude	15	0.23	2.583	1.731	0.741	1.593	0.607	0.157	0.336		01BL_aKOdmso	rlbp1a-/-	BL	139	0.001	0.402322		rlbp1a+/+	LA	0.001	amplitude	15	0.479	1.607	1.316	0.297	1.233	0.28	0.072	0.155
01BL_aKO	rlbp1a-/-	BL	139	0.01	1.27686		rlbp1a+/+	LA	0.01	amplitude	15	0.405	7.361	5.537	3.459	4.616	2.274	0.587	1.259		01BL_aKOdmso	rlbp1a-/-	BL	139	0.01	1.12998		rlbp1a+/+	LA	0.01	amplitude	15	0.636	2.713	2.353	0.801	2.059	0.634	0.164	0.351
01BL_aKO	rlbp1a-/-	BL	139	0.1	4.6989		rlbp1a+/+	LA	0.1	amplitude	15	0.929	13.798	8.973	5.308	7.67	3.825	0.988	2.118		01BL_aKOdmso	rlbp1a-/-	BL	139	0.1	2.1677		rlbp1a+/+	LA	0.1	amplitude	15	0.964	3.715	2.996	0.963	2.659	0.8	0.207	0.443
01BL_aKO	rlbp1a-/-	BL	139	1	10.8169		rlbp1a+/+	LA	1	amplitude	15	0.866	14.122	8.704	7.017	8.281	4.385	1.132	2.428		01BL_aKOdmso	rlbp1a-/-	BL	139	1	3.2889		rlbp1a+/+	LA	1	amplitude	15	0.931	3.758	2.95	1.229	2.754	0.865	0.223	0.479
01BL_WT	rlbp1a+/+	BL	139	0.0001	0.481588		rlbp1a+/+	BL	0.0001	amplitude	15	0.038	0.721	0.096	0.064	0.165	0.192	0.05	0.107		01BL_WTdmso	rlbp1a+/+	BL	139	0.0001	0.693966		rlbp1a+/+	BL	0.0001	amplitude	15	0.196	0.849	0.309	0.106	0.364	0.187	0.048	0.104
01BL_WT	rlbp1a+/+	BL	139	0.001	0.491333		rlbp1a+/+	BL	0.001	amplitude	15	0.122	1.214	0.461	0.282	0.491	0.304	0.079	0.168		01BL_WTdmso	rlbp1a+/+	BL	139	0.001	0.700952		rlbp1a+/+	BL	0.001	amplitude	15	0.349	1.102	0.679	0.223	0.672	0.208	0.054	0.115
01BL_WT	rlbp1a+/+	BL	139	0.01	3.31284		rlbp1a+/+	BL	0.01	amplitude	15	0.597	4.603	2.039	1.7	2.39	1.191	0.307	0.659		01BL_WTdmso	rlbp1a+/+	BL	139	0.01	1.82012		rlbp1a+/+	BL	0.01	amplitude	15	0.773	2.145	1.428	0.557	1.498	0.395	0.102	0.219
01BL_WT	rlbp1a+/+	BL	139	0.1	7.15273		rlbp1a+/+	BL	0.1	amplitude	15	0.36	10.809	6.182	1.639	5.981	2.801	0.723	1.551		01BL_WTdmso	rlbp1a+/+	BL	139	0.1	2.67446		rlbp1a+/+	BL	0.1	amplitude	15	0.6	3.288	2.486	0.33	2.343	0.725	0.187	0.401
01BL_WT	rlbp1a+/+	BL	139	1	12.1953		rlbp1a+/+	BL	1	amplitude	15	0.554	18.31	11.419	7.578	9.956	5.327	1.375	2.95		01BL_WTdmso	rlbp1a+/+	BL	139	1	3.49217		rlbp1a+/+	BL	1	amplitude	15	0.744	4.279	3.379	1.274	2.994	1.03	0.266	0.57
01DA_aKO	rlbp1a-/-	LA	139	0.0001	0.181431		rlbp1a+/+	reDA	0.0001	amplitude	15	0.143	0.904	0.341	0.26	0.403	0.242	0.063	0.134		01DA_aKOdmso	rlbp1a-/-	LA	139	0.0001	0.425948		rlbp1a+/+	reDA	0.0001	amplitude	15	0.378	0.951	0.584	0.227	0.61	0.183	0.047	0.101
01DA_aKO	rlbp1a-/-	LA	139	0.001	1.14733		rlbp1a+/+	reDA	0.001	amplitude	15	0.847	3.562	1.661	0.831	1.783	0.734	0.189	0.406		01DA_aKOdmso	rlbp1a-/-	LA	139	0.001	1.07114		rlbp1a+/+	reDA	0.001	amplitude	15	0.92	1.887	1.289	0.324	1.311	0.259	0.067	0.144
01DA_aKO	rlbp1a-/-	LA	139	0.01	4.64371		rlbp1a+/+	reDA	0.01	amplitude	15	3.423	8.456	5.633	2.034	5.657	1.633	0.422	0.905		01DA_aKOdmso	rlbp1a-/-	LA	139	0.01	2.15493		rlbp1a+/+	reDA	0.01	amplitude	15	1.85	2.908	2.373	0.438	2.355	0.343	0.089	0.19
01DA_aKO	rlbp1a-/-	LA	139	0.1	4.00337		rlbp1a+/+	reDA	0.1	amplitude	15	4.779	12.713	8.314	4.51	8.886	2.491	0.643	1.38		01DA_aKOdmso	rlbp1a-/-	LA	139	0.1	2.00084		rlbp1a+/+	reDA	0.1	amplitude	15	2.186	3.566	2.883	0.748	2.953	0.42	0.108	0.232
01DA_aKO	rlbp1a-/-	LA	139	1	5.79922		rlbp1a+/+	reDA	1	amplitude	15	5.957	17.663	9.166	5.487	10.536	3.459	0.893	1.915		01DA_aKOdmso	rlbp1a-/-	LA	139	1	2.40816		rlbp1a+/+	reDA	1	amplitude	15	2.441	4.203	3.028	0.836	3.207	0.519	0.134	0.288
01DA_WT	rlbp1a+/+	LA	139	0.0001	0.281922		rlbp1a-/-	LA	0.0001	amplitude	15	0.055	1.481	0.215	0.125	0.285	0.344	0.089	0.19		01DA_WTdmso	rlbp1a+/+	LA	139	0.0001	0.530963		rlbp1a-/-	LA	0.0001	amplitude	15	0.234	1.217	0.463	0.141	0.485	0.231	0.06	0.128
01DA_WT	rlbp1a+/+	LA	139	0.001	2.58302		rlbp1a-/-	LA	0.001	amplitude	15	0.343	1.694	1.048	0.66	0.998	0.446	0.115	0.247		01DA_WTdmso	rlbp1a+/+	LA	139	0.001	1.60718		rlbp1a-/-	LA	0.001	amplitude	15	0.585	1.302	1.024	0.348	0.973	0.234	0.06	0.129
01DA_WT	rlbp1a+/+	LA	139	0.01	6.64347		rlbp1a-/-	LA	0.01	amplitude	15	0.059	5.592	3.527	2.583	3.167	1.761	0.455	0.975		01DA_WTdmso	rlbp1a+/+	LA	139	0.01	2.57749		rlbp1a-/-	LA	0.01	amplitude	15	0.242	2.365	1.878	0.74	1.68	0.608	0.157	0.336
01DA_WT	rlbp1a+/+	LA	139	0.1	8.97347		rlbp1a-/-	LA	0.1	amplitude	15	0.277	8.842	5.257	3.838	4.546	2.558	0.66	1.417		01DA_WTdmso	rlbp1a+/+	LA	139	0.1	2.99558		rlbp1a-/-	LA	0.1	amplitude	15	0.526	2.973	2.293	0.924	2.015	0.72	0.186	0.399
01DA_WT	rlbp1a+/+	LA	139	1	14.0882		rlbp1a-/-	LA	1	amplitude	15	0.445	10.765	6.14	5.797	5.775	3.337	0.862	1.848		01DA_WTdmso	rlbp1a+/+	LA	139	1	3.75343		rlbp1a-/-	LA	1	amplitude	15	0.667	3.281	2.478	1.335	2.275	0.802	0.207	0.444
01reDA_aKO	rlbp1a-/-	reDA	139	0.0001	0.112569		rlbp1a-/-	BL	0.0001	amplitude	15	0.041	0.367	0.106	0.092	0.142	0.103	0.027	0.057		01reDA_aKOdmso	rlbp1a-/-	reDA	139	0.0001	0.335512		rlbp1a-/-	BL	0.0001	amplitude	15	0.202	0.605	0.325	0.133	0.356	0.126	0.032	0.07
01reDA_aKO	rlbp1a-/-	reDA	139	0.001	0.300137		rlbp1a-/-	BL	0.001	amplitude	15	0.062	0.794	0.162	0.134	0.21	0.186	0.048	0.103		01reDA_aKOdmso	rlbp1a-/-	reDA	139	0.001	0.547848		rlbp1a-/-	BL	0.001	amplitude	15	0.249	0.891	0.402	0.171	0.429	0.169	0.044	0.093
01reDA_aKO	rlbp1a-/-	reDA	139	0.01	0.726451		rlbp1a-/-	BL	0.01	amplitude	15	0.091	1.277	0.388	0.371	0.464	0.295	0.076	0.163		01reDA_aKOdmso	rlbp1a-/-	reDA	139	0.01	0.852321		rlbp1a-/-	BL	0.01	amplitude	15	0.302	1.13	0.623	0.279	0.651	0.206	0.053	0.114
01reDA_aKO	rlbp1a-/-	reDA	139	0.1	0.842667		rlbp1a-/-	BL	0.1	amplitude	15	0.194	4.699	1.637	1.159	1.798	1.116	0.288	0.618		01reDA_aKOdmso	rlbp1a-/-	reDA	139	0.1	0.917969		rlbp1a-/-	BL	0.1	amplitude	15	0.441	2.168	1.279	0.455	1.278	0.42	0.109	0.233
01reDA_aKO	rlbp1a-/-	reDA	139	1	1.51963		rlbp1a-/-	BL	1	amplitude	15	0.362	10.817	4.919	3.474	4.979	2.649	0.684	1.467		01reDA_aKOdmso	rlbp1a-/-	reDA	139	1	1.23273		rlbp1a-/-	BL	1	amplitude	15	0.602	3.289	2.218	0.793	2.137	0.663	0.171	0.367
01reDA_WT	rlbp1a+/+	reDA	139	0.0001	0.900922		rlbp1a-/-	reDA	0.0001	amplitude	15	0.039	0.623	0.135	0.077	0.174	0.15	0.039	0.083		01reDA_WTdmso	rlbp1a+/+	reDA	139	0.0001	0.949169		rlbp1a-/-	reDA	0.0001	amplitude	15	0.197	0.79	0.367	0.103	0.392	0.149	0.039	0.083
01reDA_WT	rlbp1a+/+	reDA	139	0.001	3.56231		rlbp1a-/-	reDA	0.001	amplitude	15	0.112	1.61	0.414	0.2	0.478	0.345	0.089	0.191		01reDA_WTdmso	rlbp1a+/+	reDA	139	0.001	1.88741		rlbp1a-/-	reDA	0.001	amplitude	15	0.334	1.269	0.644	0.16	0.662	0.206	0.053	0.114
01reDA_WT	rlbp1a+/+	reDA	139	0.01	8.45602		rlbp1a-/-	reDA	0.01	amplitude	15	0.255	7.896	1.449	2.311	2.037	1.98	0.511	1.097		01reDA_WTdmso	rlbp1a+/+	reDA	139	0.01	2.90792		rlbp1a-/-	reDA	0.01	amplitude	15	0.505	2.81	1.204	0.89	1.291	0.63	0.163	0.349
01reDA_WT	rlbp1a+/+	reDA	139	0.1	11.4789		rlbp1a-/-	reDA	0.1	amplitude	15	0.582	10.804	3.133	5.309	4.181	3.307	0.854	1.832		01reDA_WTdmso	rlbp1a+/+	reDA	139	0.1	3.38806		rlbp1a-/-	reDA	0.1	amplitude	15	0.763	3.287	1.77	1.462	1.872	0.851	0.22	0.471
01reDA_WT	rlbp1a+/+	reDA	139	1	13.937		rlbp1a-/-	reDA	1	amplitude	15	0.036	13.765	3.852	6.076	5.203	4.436	1.145	2.457		01reDA_WTdmso	rlbp1a+/+	reDA	139	1	3.73323		rlbp1a-/-	reDA	1	amplitude	15	0.189	3.71	1.963	1.533	2.045	1.047	0.27	0.58
02BL_aKO	rlbp1a-/-	BL	139	0.0001	0.0500392																02BL_aKOdmso	rlbp1a-/-	BL	139	0.0001	0.223694
02BL_aKO	rlbp1a-/-	BL	139	0.001	0.11602																02BL_aKOdmso	rlbp1a-/-	BL	139	0.001	0.340617
02BL_aKO	rlbp1a-/-	BL	139	0.01	0.659196																02BL_aKOdmso	rlbp1a-/-	BL	139	0.01	0.811909
02BL_aKO	rlbp1a-/-	BL	139	0.1	2.91494																02BL_aKOdmso	rlbp1a-/-	BL	139	0.1	1.70732
02BL_aKO	rlbp1a-/-	BL	139	1	7.21794																02BL_aKOdmso	rlbp1a-/-	BL	139	1	2.68662
02BL_WT	rlbp1a+/+	BL	139	0.0001	0.138275																02BL_WTdmso	rlbp1a+/+	BL	139	0.0001	0.371853
02BL_WT	rlbp1a+/+	BL	139	0.001	0.480235																02BL_WTdmso	rlbp1a+/+	BL	139	0.001	0.69299
02BL_WT	rlbp1a+/+	BL	139	0.01	3.72825																02BL_WTdmso	rlbp1a+/+	BL	139	0.01	1.93087
02BL_WT	rlbp1a+/+	BL	139	0.1	9.11522																02BL_WTdmso	rlbp1a+/+	BL	139	0.1	3.01914
02BL_WT	rlbp1a+/+	BL	139	1	15.07																02BL_WTdmso	rlbp1a+/+	BL	139	1	3.88201
02DA_aKO	rlbp1a-/-	LA	139	0.0001	0.160902																02DA_aKOdmso	rlbp1a-/-	LA	139	0.0001	0.401126
02DA_aKO	rlbp1a-/-	LA	139	0.001	0.992824																02DA_aKOdmso	rlbp1a-/-	LA	139	0.001	0.996405
02DA_aKO	rlbp1a-/-	LA	139	0.01	1.76533																02DA_aKOdmso	rlbp1a-/-	LA	139	0.01	1.32866
02DA_aKO	rlbp1a-/-	LA	139	0.1	5.74745																02DA_aKOdmso	rlbp1a-/-	LA	139	0.1	2.39738
02DA_aKO	rlbp1a-/-	LA	139	1	8.14669																02DA_aKOdmso	rlbp1a-/-	LA	139	1	2.85424
02DA_WT	rlbp1a+/+	LA	139	0.0001	0.219294																02DA_WTdmso	rlbp1a+/+	LA	139	0.0001	0.468288
02DA_WT	rlbp1a+/+	LA	139	0.001	1.99743																02DA_WTdmso	rlbp1a+/+	LA	139	0.001	1.41331
02DA_WT	rlbp1a+/+	LA	139	0.01	5.64039																02DA_WTdmso	rlbp1a+/+	LA	139	0.01	2.37495
02DA_WT	rlbp1a+/+	LA	139	0.1	9.15906																02DA_WTdmso	rlbp1a+/+	LA	139	0.1	3.02639
02DA_WT	rlbp1a+/+	LA	139	1	13.1195																02DA_WTdmso	rlbp1a+/+	LA	139	1	3.62209
02reDA_aKO	rlbp1a-/-	reDA	139	0.0001	0.124961																02reDA_aKOdmso	rlbp1a-/-	reDA	139	0.0001	0.353498
02reDA_aKO	rlbp1a-/-	reDA	139	0.001	0.27502																02reDA_aKOdmso	rlbp1a-/-	reDA	139	0.001	0.524423
02reDA_aKO	rlbp1a-/-	reDA	139	0.01	0.950627																02reDA_aKOdmso	rlbp1a-/-	reDA	139	0.01	0.975001
02reDA_aKO	rlbp1a-/-	reDA	139	0.1	2.20841																02reDA_aKOdmso	rlbp1a-/-	reDA	139	0.1	1.48607
02reDA_aKO	rlbp1a-/-	reDA	139	1	3.85227																02reDA_aKOdmso	rlbp1a-/-	reDA	139	1	1.96272
02reDA_WT	rlbp1a+/+	reDA	139	0.0001	0.14251																02reDA_WTdmso	rlbp1a+/+	reDA	139	0.0001	0.377505
02reDA_WT	rlbp1a+/+	reDA	139	0.001	1.43716																02reDA_WTdmso	rlbp1a+/+	reDA	139	0.001	1.19881
02reDA_WT	rlbp1a+/+	reDA	139	0.01	6.12216																02reDA_WTdmso	rlbp1a+/+	reDA	139	0.01	2.4743
02reDA_WT	rlbp1a+/+	reDA	139	0.1	8.86014																02reDA_WTdmso	rlbp1a+/+	reDA	139	0.1	2.9766
02reDA_WT	rlbp1a+/+	reDA	139	1	11.1556																02reDA_WTdmso	rlbp1a+/+	reDA	139	1	3.34
03BL_aKO	rlbp1a-/-	BL	139	0.0001	0.36651																03BL_aKOdmso	rlbp1a-/-	BL	139	0.0001	0.605401
03BL_aKO	rlbp1a-/-	BL	139	0.001	0.794118																03BL_aKOdmso	rlbp1a-/-	BL	139	0.001	0.891133
03BL_aKO	rlbp1a-/-	BL	139	0.01	0.480275																03BL_aKOdmso	rlbp1a-/-	BL	139	0.01	0.693018
03BL_aKO	rlbp1a-/-	BL	139	0.1	2.3928																03BL_aKOdmso	rlbp1a-/-	BL	139	0.1	1.54687
03BL_aKO	rlbp1a-/-	BL	139	1	7.46886																03BL_aKOdmso	rlbp1a-/-	BL	139	1	2.73292
03BL_WT	rlbp1a+/+	BL	139	0.0001	0.109275																03BL_WTdmso	rlbp1a+/+	BL	139	0.0001	0.330567
03BL_WT	rlbp1a+/+	BL	139	0.001	0.980333																03BL_WTdmso	rlbp1a+/+	BL	139	0.001	0.990118
03BL_WT	rlbp1a+/+	BL	139	0.01	4.17667																03BL_WTdmso	rlbp1a+/+	BL	139	0.01	2.04369
03BL_WT	rlbp1a+/+	BL	139	0.1	8.98716																03BL_WTdmso	rlbp1a+/+	BL	139	0.1	2.99786
03BL_WT	rlbp1a+/+	BL	139	1	14.3217																03BL_WTdmso	rlbp1a+/+	BL	139	1	3.7844
03DA_aKO	rlbp1a-/-	LA	139	0.0001	0.214804																03DA_aKOdmso	rlbp1a-/-	LA	139	0.0001	0.463469
03DA_aKO	rlbp1a-/-	LA	139	0.001	1.07053																03DA_aKOdmso	rlbp1a-/-	LA	139	0.001	1.03466
03DA_aKO	rlbp1a-/-	LA	139	0.01	3.26427																03DA_aKOdmso	rlbp1a-/-	LA	139	0.01	1.80673
03DA_aKO	rlbp1a-/-	LA	139	0.1	5.25749																03DA_aKOdmso	rlbp1a-/-	LA	139	0.1	2.29292
03DA_aKO	rlbp1a-/-	LA	139	1	7.68586																03DA_aKOdmso	rlbp1a-/-	LA	139	1	2.77234
03DA_WT	rlbp1a+/+	LA	139	0.0001	0.298078																03DA_WTdmso	rlbp1a+/+	LA	139	0.0001	0.545966
03DA_WT	rlbp1a+/+	LA	139	0.001	2.05806																03DA_WTdmso	rlbp1a+/+	LA	139	0.001	1.43459
03DA_WT	rlbp1a+/+	LA	139	0.01	6.75961																03DA_WTdmso	rlbp1a+/+	LA	139	0.01	2.59992
03DA_WT	rlbp1a+/+	LA	139	0.1	11.1092																03DA_WTdmso	rlbp1a+/+	LA	139	0.1	3.33304
03DA_WT	rlbp1a+/+	LA	139	1	12.453																03DA_WTdmso	rlbp1a+/+	LA	139	1	3.52888
03reDA_aKO	rlbp1a-/-	reDA	139	0.0001	0.196																03reDA_aKOdmso	rlbp1a-/-	reDA	139	0.0001	0.442719
03reDA_aKO	rlbp1a-/-	reDA	139	0.001	0.487843																03reDA_aKOdmso	rlbp1a-/-	reDA	139	0.001	0.698458
03reDA_aKO	rlbp1a-/-	reDA	139	0.01	1.44871																03reDA_aKOdmso	rlbp1a-/-	reDA	139	0.01	1.20362
03reDA_aKO	rlbp1a-/-	reDA	139	0.1	2.07912																03reDA_aKOdmso	rlbp1a-/-	reDA	139	0.1	1.44191
03reDA_aKO	rlbp1a-/-	reDA	139	1	1.86861																03reDA_aKOdmso	rlbp1a-/-	reDA	139	1	1.36697
03reDA_WT	rlbp1a+/+	reDA	139	0.0001	0.340667																03reDA_WTdmso	rlbp1a+/+	reDA	139	0.0001	0.583667
03reDA_WT	rlbp1a+/+	reDA	139	0.001	2.20276																03reDA_WTdmso	rlbp1a+/+	reDA	139	0.001	1.48417
03reDA_WT	rlbp1a+/+	reDA	139	0.01	8.43055																03reDA_WTdmso	rlbp1a+/+	reDA	139	0.01	2.90354
03reDA_WT	rlbp1a+/+	reDA	139	0.1	11.9539																03reDA_WTdmso	rlbp1a+/+	reDA	139	0.1	3.45744
03reDA_WT	rlbp1a+/+	reDA	139	1	17.6634																03reDA_WTdmso	rlbp1a+/+	reDA	139	1	4.20279
04BL_aKO	rlbp1a-/-	BL	139	0.0001	0.0825882																04BL_aKOdmso	rlbp1a-/-	BL	139	0.0001	0.287382
04BL_aKO	rlbp1a-/-	BL	139	0.001	0.224941																04BL_aKOdmso	rlbp1a-/-	BL	139	0.001	0.47428
04BL_aKO	rlbp1a-/-	BL	139	0.01	0.388353																04BL_aKOdmso	rlbp1a-/-	BL	139	0.01	0.62318
04BL_aKO	rlbp1a-/-	BL	139	0.1	2.75063																04BL_aKOdmso	rlbp1a-/-	BL	139	0.1	1.6585
04BL_aKO	rlbp1a-/-	BL	139	1	2.35255																04BL_aKOdmso	rlbp1a-/-	BL	139	1	1.5338
04BL_WT	rlbp1a+/+	BL	139	0.0001	0.0942549																04BL_WTdmso	rlbp1a+/+	BL	139	0.0001	0.30701
04BL_WT	rlbp1a+/+	BL	139	0.001	0.797412																04BL_WTdmso	rlbp1a+/+	BL	139	0.001	0.892979
04BL_WT	rlbp1a+/+	BL	139	0.01	3.19131																04BL_WTdmso	rlbp1a+/+	BL	139	0.01	1.78642
04BL_WT	rlbp1a+/+	BL	139	0.1	6.91253																04BL_WTdmso	rlbp1a+/+	BL	139	0.1	2.62917
04BL_WT	rlbp1a+/+	BL	139	1	11.812																04BL_WTdmso	rlbp1a+/+	BL	139	1	3.43685
04DA_aKO	rlbp1a-/-	LA	139	0.0001	0.254353																04DA_aKOdmso	rlbp1a-/-	LA	139	0.0001	0.504334
04DA_aKO	rlbp1a-/-	LA	139	0.001	1.35867																04DA_aKOdmso	rlbp1a-/-	LA	139	0.001	1.16562
04DA_aKO	rlbp1a-/-	LA	139	0.01	3.52727																04DA_aKOdmso	rlbp1a-/-	LA	139	0.01	1.8781
04DA_aKO	rlbp1a-/-	LA	139	0.1	6.85871																04DA_aKOdmso	rlbp1a-/-	LA	139	0.1	2.61891
04DA_aKO	rlbp1a-/-	LA	139	1	9.36743																04DA_aKOdmso	rlbp1a-/-	LA	139	1	3.06063
04DA_WT	rlbp1a+/+	LA	139	0.0001	0.0567647																04DA_WTdmso	rlbp1a+/+	LA	139	0.0001	0.238253
04DA_WT	rlbp1a+/+	LA	139	0.001	1.02506																04DA_WTdmso	rlbp1a+/+	LA	139	0.001	1.01245
04DA_WT	rlbp1a+/+	LA	139	0.01	2.65524																04DA_WTdmso	rlbp1a+/+	LA	139	0.01	1.62949
04DA_WT	rlbp1a+/+	LA	139	0.1	3.93849																04DA_WTdmso	rlbp1a+/+	LA	139	0.1	1.98456
04DA_WT	rlbp1a+/+	LA	139	1	3.97749																04DA_WTdmso	rlbp1a+/+	LA	139	1	1.99436
04reDA_aKO	rlbp1a-/-	reDA	139	0.0001	0.139353																04reDA_aKOdmso	rlbp1a-/-	reDA	139	0.0001	0.3733
04reDA_aKO	rlbp1a-/-	reDA	139	0.001	0.276412																04reDA_aKOdmso	rlbp1a-/-	reDA	139	0.001	0.525749
04reDA_aKO	rlbp1a-/-	reDA	139	0.01	0.76149																04reDA_aKOdmso	rlbp1a-/-	reDA	139	0.01	0.872634
04reDA_aKO	rlbp1a-/-	reDA	139	0.1	0.997314																04reDA_aKOdmso	rlbp1a-/-	reDA	139	0.1	0.998656
04reDA_aKO	rlbp1a-/-	reDA	139	1	1.4188																04reDA_aKOdmso	rlbp1a-/-	reDA	139	1	1.19114
04reDA_WT	rlbp1a+/+	reDA	139	0.0001	0.448235																04reDA_WTdmso	rlbp1a+/+	reDA	139	0.0001	0.669504
04reDA_WT	rlbp1a+/+	reDA	139	0.001	1.81337																04reDA_WTdmso	rlbp1a+/+	reDA	139	0.001	1.34662
04reDA_WT	rlbp1a+/+	reDA	139	0.01	5.11465																04reDA_WTdmso	rlbp1a+/+	reDA	139	0.01	2.26156
04reDA_WT	rlbp1a+/+	reDA	139	0.1	4.77904																04reDA_WTdmso	rlbp1a+/+	reDA	139	0.1	2.1861
04reDA_WT	rlbp1a+/+	reDA	139	1	9.16629																04reDA_WTdmso	rlbp1a+/+	reDA	139	1	3.02759
05BL_aKO	rlbp1a-/-	BL	139	0.0001	0.147118																05BL_aKOdmso	rlbp1a-/-	BL	139	0.0001	0.383559
05BL_aKO	rlbp1a-/-	BL	139	0.001	0.0621961																05BL_aKOdmso	rlbp1a-/-	BL	139	0.001	0.249391
05BL_aKO	rlbp1a-/-	BL	139	0.01	0.0909804																05BL_aKOdmso	rlbp1a-/-	BL	139	0.01	0.30163
05BL_aKO	rlbp1a-/-	BL	139	0.1	1.48014																05BL_aKOdmso	rlbp1a-/-	BL	139	0.1	1.21661
05BL_aKO	rlbp1a-/-	BL	139	1	1.78645																05BL_aKOdmso	rlbp1a-/-	BL	139	1	1.33658
05BL_WT	rlbp1a+/+	BL	139	0.0001	0.288902																05BL_WTdmso	rlbp1a+/+	BL	139	0.0001	0.537496
05BL_WT	rlbp1a+/+	BL	139	0.001	1.21449																05BL_WTdmso	rlbp1a+/+	BL	139	0.001	1.10204
05BL_WT	rlbp1a+/+	BL	139	0.01	4.60298																05BL_WTdmso	rlbp1a+/+	BL	139	0.01	2.14546
05BL_WT	rlbp1a+/+	BL	139	0.1	10.8094																05BL_WTdmso	rlbp1a+/+	BL	139	0.1	3.28776
05BL_WT	rlbp1a+/+	BL	139	1	18.3098																05BL_WTdmso	rlbp1a+/+	BL	139	1	4.279
05DA_aKO	rlbp1a-/-	LA	139	0.0001	0.054549																05DA_aKOdmso	rlbp1a-/-	LA	139	0.0001	0.233557
05DA_aKO	rlbp1a-/-	LA	139	0.001	0.463275																05DA_aKOdmso	rlbp1a-/-	LA	139	0.001	0.680643
05DA_aKO	rlbp1a-/-	LA	139	0.01	1.09216																05DA_aKOdmso	rlbp1a-/-	LA	139	0.01	1.04506
05DA_aKO	rlbp1a-/-	LA	139	0.1	1.32902																05DA_aKOdmso	rlbp1a-/-	LA	139	0.1	1.15283
05DA_aKO	rlbp1a-/-	LA	139	1	2.38843																05DA_aKOdmso	rlbp1a-/-	LA	139	1	1.54546
05DA_WT	rlbp1a+/+	LA	139	0.0001	0.413549																05DA_WTdmso	rlbp1a+/+	LA	139	0.0001	0.643078
05DA_WT	rlbp1a+/+	LA	139	0.001	1.96749																05DA_WTdmso	rlbp1a+/+	LA	139	0.001	1.40267
05DA_WT	rlbp1a+/+	LA	139	0.01	6.4809																05DA_WTdmso	rlbp1a+/+	LA	139	0.01	2.54576
05DA_WT	rlbp1a+/+	LA	139	0.1	10.4743																05DA_WTdmso	rlbp1a+/+	LA	139	0.1	3.2364
05DA_WT	rlbp1a+/+	LA	139	1	14.1218																05DA_WTdmso	rlbp1a+/+	LA	139	1	3.7579
05reDA_aKO	rlbp1a-/-	reDA	139	0.0001	0.0957255																05reDA_aKOdmso	rlbp1a-/-	reDA	139	0.0001	0.309395
05reDA_aKO	rlbp1a-/-	reDA	139	0.001	0.295353																05reDA_aKOdmso	rlbp1a-/-	reDA	139	0.001	0.543464
05reDA_aKO	rlbp1a-/-	reDA	139	0.01	0.726549																05reDA_aKOdmso	rlbp1a-/-	reDA	139	0.01	0.852378
05reDA_aKO	rlbp1a-/-	reDA	139	0.1	3.13296																05reDA_aKOdmso	rlbp1a-/-	reDA	139	0.1	1.77002
05reDA_aKO	rlbp1a-/-	reDA	139	1	3.29578																05reDA_aKOdmso	rlbp1a-/-	reDA	139	1	1.81543
05reDA_WT	rlbp1a+/+	reDA	139	0.0001	0.175412																05reDA_WTdmso	rlbp1a+/+	reDA	139	0.0001	0.418822
05reDA_WT	rlbp1a+/+	reDA	139	0.001	1.17071																05reDA_WTdmso	rlbp1a+/+	reDA	139	0.001	1.08199
05reDA_WT	rlbp1a+/+	reDA	139	0.01	4.91867																05reDA_WTdmso	rlbp1a+/+	reDA	139	0.01	2.21781
05reDA_WT	rlbp1a+/+	reDA	139	0.1	8.31355																05reDA_WTdmso	rlbp1a+/+	reDA	139	0.1	2.88332
05reDA_WT	rlbp1a+/+	reDA	139	1	8.00645																05reDA_WTdmso	rlbp1a+/+	reDA	139	1	2.82957
amut__BL01	rlbp1a-/-	BL	143	0.0001	0.0630196																amut_dmso_BL01	rlbp1a-/-	BL	143	0.0001	0.251037
amut__BL01	rlbp1a-/-	BL	143	0.001	0.225843																amut_dmso_BL01	rlbp1a-/-	BL	143	0.001	0.47523
amut__BL01	rlbp1a-/-	BL	143	0.01	0.691098																amut_dmso_BL01	rlbp1a-/-	BL	143	0.01	0.831323
amut__BL01	rlbp1a-/-	BL	143	0.1	2.10631																amut_dmso_BL01	rlbp1a-/-	BL	143	0.1	1.45131
amut__BL01	rlbp1a-/-	BL	143	1	4.64078																amut_dmso_BL01	rlbp1a-/-	BL	143	1	2.15425
amut__BL02	rlbp1a-/-	BL	143	0.0001	0.191412																amut_dmso_BL02	rlbp1a-/-	BL	143	0.0001	0.437506
amut__BL02	rlbp1a-/-	BL	143	0.001	0.197196																amut_dmso_BL02	rlbp1a-/-	BL	143	0.001	0.444068
amut__BL02	rlbp1a-/-	BL	143	0.01	0.419608																amut_dmso_BL02	rlbp1a-/-	BL	143	0.01	0.647771
amut__BL02	rlbp1a-/-	BL	143	0.1	1.63686																amut_dmso_BL02	rlbp1a-/-	BL	143	0.1	1.2794
amut__BL02	rlbp1a-/-	BL	143	1	5.16553																amut_dmso_BL02	rlbp1a-/-	BL	143	1	2.27278
amut__BL03	rlbp1a-/-	BL	143	0.0001	0.0773529																amut_dmso_BL03	rlbp1a-/-	BL	143	0.0001	0.278124
amut__BL03	rlbp1a-/-	BL	143	0.001	0.0700588																amut_dmso_BL03	rlbp1a-/-	BL	143	0.001	0.264686
amut__BL03	rlbp1a-/-	BL	143	0.01	0.212941																amut_dmso_BL03	rlbp1a-/-	BL	143	0.01	0.461455
amut__BL03	rlbp1a-/-	BL	143	0.1	0.961392																amut_dmso_BL03	rlbp1a-/-	BL	143	0.1	0.980506
amut__BL03	rlbp1a-/-	BL	143	1	4.2008																amut_dmso_BL03	rlbp1a-/-	BL	143	1	2.04959
amut__BL04	rlbp1a-/-	BL	143	0.0001	0.293804																amut_dmso_BL04	rlbp1a-/-	BL	143	0.0001	0.542037
amut__BL04	rlbp1a-/-	BL	143	0.001	0.100451																amut_dmso_BL04	rlbp1a-/-	BL	143	0.001	0.31694
amut__BL04	rlbp1a-/-	BL	143	0.01	0.173882																amut_dmso_BL04	rlbp1a-/-	BL	143	0.01	0.416992
amut__BL04	rlbp1a-/-	BL	143	0.1	0.603686																amut_dmso_BL04	rlbp1a-/-	BL	143	0.1	0.776973
amut__BL04	rlbp1a-/-	BL	143	1	2.68804																amut_dmso_BL04	rlbp1a-/-	BL	143	1	1.63952
amut__BL05	rlbp1a-/-	BL	143	0.0001	0.114373																amut_dmso_BL05	rlbp1a-/-	BL	143	0.0001	0.33819
amut__BL05	rlbp1a-/-	BL	143	0.001	0.358922																amut_dmso_BL05	rlbp1a-/-	BL	143	0.001	0.599101
amut__BL05	rlbp1a-/-	BL	143	0.01	0.315392																amut_dmso_BL05	rlbp1a-/-	BL	143	0.01	0.561598
amut__BL05	rlbp1a-/-	BL	143	0.1	0.194255																amut_dmso_BL05	rlbp1a-/-	BL	143	0.1	0.440744
amut__BL05	rlbp1a-/-	BL	143	1	0.362137																amut_dmso_BL05	rlbp1a-/-	BL	143	1	0.601778
amut__DA01	rlbp1a-/-	LA	143	0.0001	0.0733922																amut_dmso_DA01	rlbp1a-/-	LA	143	0.0001	0.27091
amut__DA01	rlbp1a-/-	LA	143	0.001	1.19024																amut_dmso_DA01	rlbp1a-/-	LA	143	0.001	1.09098
amut__DA01	rlbp1a-/-	LA	143	0.01	5.31843																amut_dmso_DA01	rlbp1a-/-	LA	143	0.01	2.30617
amut__DA01	rlbp1a-/-	LA	143	0.1	5.29298																amut_dmso_DA01	rlbp1a-/-	LA	143	0.1	2.30065
amut__DA01	rlbp1a-/-	LA	143	1	5.39906																amut_dmso_DA01	rlbp1a-/-	LA	143	1	2.32359
amut__DA02	rlbp1a-/-	LA	143	0.0001	0.264706																amut_dmso_DA02	rlbp1a-/-	LA	143	0.0001	0.514496
amut__DA02	rlbp1a-/-	LA	143	0.001	0.729																amut_dmso_DA02	rlbp1a-/-	LA	143	0.001	0.853815
amut__DA02	rlbp1a-/-	LA	143	0.01	3.77575																amut_dmso_DA02	rlbp1a-/-	LA	143	0.01	1.94313
amut__DA02	rlbp1a-/-	LA	143	0.1	6.94686																amut_dmso_DA02	rlbp1a-/-	LA	143	0.1	2.63569
amut__DA02	rlbp1a-/-	LA	143	1	10.7652																amut_dmso_DA02	rlbp1a-/-	LA	143	1	3.28103
amut__DA03	rlbp1a-/-	LA	143	0.0001	0.314275																amut_dmso_DA03	rlbp1a-/-	LA	143	0.0001	0.560602
amut__DA03	rlbp1a-/-	LA	143	0.001	0.448314																amut_dmso_DA03	rlbp1a-/-	LA	143	0.001	0.669562
amut__DA03	rlbp1a-/-	LA	143	0.01	2.0861																amut_dmso_DA03	rlbp1a-/-	LA	143	0.01	1.44433
amut__DA03	rlbp1a-/-	LA	143	0.1	2.387																amut_dmso_DA03	rlbp1a-/-	LA	143	0.1	1.54499
amut__DA03	rlbp1a-/-	LA	143	1	2.14222																amut_dmso_DA03	rlbp1a-/-	LA	143	1	1.46363
amut__DA04	rlbp1a-/-	LA	143	0.0001	0.156588																amut_dmso_DA04	rlbp1a-/-	LA	143	0.0001	0.395712
amut__DA04	rlbp1a-/-	LA	143	0.001	0.500176																amut_dmso_DA04	rlbp1a-/-	LA	143	0.001	0.707232
amut__DA04	rlbp1a-/-	LA	143	0.01	0.800941																amut_dmso_DA04	rlbp1a-/-	LA	143	0.01	0.894953
amut__DA04	rlbp1a-/-	LA	143	0.1	0.705941																amut_dmso_DA04	rlbp1a-/-	LA	143	0.1	0.840203
amut__DA04	rlbp1a-/-	LA	143	1	0.445078																amut_dmso_DA04	rlbp1a-/-	LA	143	1	0.667142
amut__DA05	rlbp1a-/-	LA	143	0.0001	0.386078																amut_dmso_DA05	rlbp1a-/-	LA	143	0.0001	0.621352
amut__DA05	rlbp1a-/-	LA	143	0.001	1.62569																amut_dmso_DA05	rlbp1a-/-	LA	143	0.001	1.27502
amut__DA05	rlbp1a-/-	LA	143	0.01	2.0262																amut_dmso_DA05	rlbp1a-/-	LA	143	0.01	1.42345
amut__DA05	rlbp1a-/-	LA	143	0.1	2.82753																amut_dmso_DA05	rlbp1a-/-	LA	143	0.1	1.68153
amut__DA05	rlbp1a-/-	LA	143	1	1.82035																amut_dmso_DA05	rlbp1a-/-	LA	143	1	1.3492
amut__reDA01	rlbp1a-/-	reDA	143	0.0001	0.136588																amut_dmso_reDA01	rlbp1a-/-	reDA	143	0.0001	0.369578
amut__reDA01	rlbp1a-/-	reDA	143	0.001	0.386745																amut_dmso_reDA01	rlbp1a-/-	reDA	143	0.001	0.621888
amut__reDA01	rlbp1a-/-	reDA	143	0.01	0.442745																amut_dmso_reDA01	rlbp1a-/-	reDA	143	0.01	0.665391
amut__reDA01	rlbp1a-/-	reDA	143	0.1	0.581882																amut_dmso_reDA01	rlbp1a-/-	reDA	143	0.1	0.762812
amut__reDA01	rlbp1a-/-	reDA	143	1	0.755529																amut_dmso_reDA01	rlbp1a-/-	reDA	143	1	0.869212
amut__reDA02	rlbp1a-/-	reDA	143	0.0001	0.167118																amut_dmso_reDA02	rlbp1a-/-	reDA	143	0.0001	0.4088
amut__reDA02	rlbp1a-/-	reDA	143	0.001	0.343608																amut_dmso_reDA02	rlbp1a-/-	reDA	143	0.001	0.586181
amut__reDA02	rlbp1a-/-	reDA	143	0.01	2.09776																amut_dmso_reDA02	rlbp1a-/-	reDA	143	0.01	1.44837
amut__reDA02	rlbp1a-/-	reDA	143	0.1	5.39029																amut_dmso_reDA02	rlbp1a-/-	reDA	143	0.1	2.3217
amut__reDA02	rlbp1a-/-	reDA	143	1	6.71145																amut_dmso_reDA02	rlbp1a-/-	reDA	143	1	2.59065
amut__reDA03	rlbp1a-/-	reDA	143	0.0001	0.134608																amut_dmso_reDA03	rlbp1a-/-	reDA	143	0.0001	0.366889
amut__reDA03	rlbp1a-/-	reDA	143	0.001	0.414196																amut_dmso_reDA03	rlbp1a-/-	reDA	143	0.001	0.643581
amut__reDA03	rlbp1a-/-	reDA	143	0.01	3.04673																amut_dmso_reDA03	rlbp1a-/-	reDA	143	0.01	1.74549
amut__reDA03	rlbp1a-/-	reDA	143	0.1	6.34502																amut_dmso_reDA03	rlbp1a-/-	reDA	143	0.1	2.51893
amut__reDA03	rlbp1a-/-	reDA	143	1	6.94463																amut_dmso_reDA03	rlbp1a-/-	reDA	143	1	2.63527
amut__reDA04	rlbp1a-/-	reDA	143	0.0001	0.623412																amut_dmso_reDA04	rlbp1a-/-	reDA	143	0.0001	0.789564
amut__reDA04	rlbp1a-/-	reDA	143	0.001	0.415686																amut_dmso_reDA04	rlbp1a-/-	reDA	143	0.001	0.644737
amut__reDA04	rlbp1a-/-	reDA	143	0.01	0.315784																amut_dmso_reDA04	rlbp1a-/-	reDA	143	0.01	0.561947
amut__reDA04	rlbp1a-/-	reDA	143	0.1	1.38004																amut_dmso_reDA04	rlbp1a-/-	reDA	143	0.1	1.17475
amut__reDA04	rlbp1a-/-	reDA	143	1	1.35763																amut_dmso_reDA04	rlbp1a-/-	reDA	143	1	1.16517
amut__reDA05	rlbp1a-/-	reDA	143	0.0001	0.038902																amut_dmso_reDA05	rlbp1a-/-	reDA	143	0.0001	0.197236
amut__reDA05	rlbp1a-/-	reDA	143	0.001	0.111686																amut_dmso_reDA05	rlbp1a-/-	reDA	143	0.001	0.334195
amut__reDA05	rlbp1a-/-	reDA	143	0.01	0.255333																amut_dmso_reDA05	rlbp1a-/-	reDA	143	0.01	0.505305
amut__reDA05	rlbp1a-/-	reDA	143	0.1	0.637784																amut_dmso_reDA05	rlbp1a-/-	reDA	143	0.1	0.798614
amut__reDA05	rlbp1a-/-	reDA	143	1	0.0357059																amut_dmso_reDA05	rlbp1a-/-	reDA	143	1	0.18896
wt__BL01	rlbp1a+/+	BL	143	0.0001	0.0983137																wt_dmso_BL01	rlbp1a+/+	BL	143	0.0001	0.31355
wt__BL01	rlbp1a+/+	BL	143	0.001	0.418627																wt_dmso_BL01	rlbp1a+/+	BL	143	0.001	0.647014
wt__BL01	rlbp1a+/+	BL	143	0.01	2.58924																wt_dmso_BL01	rlbp1a+/+	BL	143	0.01	1.60911
wt__BL01	rlbp1a+/+	BL	143	0.1	5.08975																wt_dmso_BL01	rlbp1a+/+	BL	143	0.1	2.25605
wt__BL01	rlbp1a+/+	BL	143	1	7.11924																wt_dmso_BL01	rlbp1a+/+	BL	143	1	2.66819
wt__BL02	rlbp1a+/+	BL	143	0.0001	0.0467255																wt_dmso_BL02	rlbp1a+/+	BL	143	0.0001	0.216161
wt__BL02	rlbp1a+/+	BL	143	0.001	0.188824																wt_dmso_BL02	rlbp1a+/+	BL	143	0.001	0.434538
wt__BL02	rlbp1a+/+	BL	143	0.01	1.50955																wt_dmso_BL02	rlbp1a+/+	BL	143	0.01	1.22864
wt__BL02	rlbp1a+/+	BL	143	0.1	0.874118																wt_dmso_BL02	rlbp1a+/+	BL	143	0.1	0.934943
wt__BL02	rlbp1a+/+	BL	143	1	0.553922																wt_dmso_BL02	rlbp1a+/+	BL	143	1	0.744259
wt__BL03	rlbp1a+/+	BL	143	0.0001	0.0592745																wt_dmso_BL03	rlbp1a+/+	BL	143	0.0001	0.243464
wt__BL03	rlbp1a+/+	BL	143	0.001	0.528961																wt_dmso_BL03	rlbp1a+/+	BL	143	0.001	0.727297
wt__BL03	rlbp1a+/+	BL	143	0.01	2.03902																wt_dmso_BL03	rlbp1a+/+	BL	143	0.01	1.42794
wt__BL03	rlbp1a+/+	BL	143	0.1	6.18163																wt_dmso_BL03	rlbp1a+/+	BL	143	0.1	2.48629
wt__BL03	rlbp1a+/+	BL	143	1	11.3289																wt_dmso_BL03	rlbp1a+/+	BL	143	1	3.36585
wt__BL04	rlbp1a+/+	BL	143	0.0001	0.115804																wt_dmso_BL04	rlbp1a+/+	BL	143	0.0001	0.3403
wt__BL04	rlbp1a+/+	BL	143	0.001	0.121529																wt_dmso_BL04	rlbp1a+/+	BL	143	0.001	0.348611
wt__BL04	rlbp1a+/+	BL	143	0.01	1.59043																wt_dmso_BL04	rlbp1a+/+	BL	143	0.01	1.26112
wt__BL04	rlbp1a+/+	BL	143	0.1	5.98349																wt_dmso_BL04	rlbp1a+/+	BL	143	0.1	2.44612
wt__BL04	rlbp1a+/+	BL	143	1	10.1687																wt_dmso_BL04	rlbp1a+/+	BL	143	1	3.18884
wt__BL05	rlbp1a+/+	BL	143	0.0001	0.721412																wt_dmso_BL05	rlbp1a+/+	BL	143	0.0001	0.84936
wt__BL05	rlbp1a+/+	BL	143	0.001	0.580078																wt_dmso_BL05	rlbp1a+/+	BL	143	0.001	0.761629
wt__BL05	rlbp1a+/+	BL	143	0.01	2.50324																wt_dmso_BL05	rlbp1a+/+	BL	143	0.01	1.58216
wt__BL05	rlbp1a+/+	BL	143	0.1	3.56188																wt_dmso_BL05	rlbp1a+/+	BL	143	0.1	1.88729
wt__BL05	rlbp1a+/+	BL	143	1	4.24206																wt_dmso_BL05	rlbp1a+/+	BL	143	1	2.05963
wt__DA01	rlbp1a+/+	LA	143	0.0001	0.334667																wt_dmso_DA01	rlbp1a+/+	LA	143	0.0001	0.578504
wt__DA01	rlbp1a+/+	LA	143	0.001	1.46371																wt_dmso_DA01	rlbp1a+/+	LA	143	0.001	1.20984
wt__DA01	rlbp1a+/+	LA	143	0.01	0.924922																wt_dmso_DA01	rlbp1a+/+	LA	143	0.01	0.961728
wt__DA01	rlbp1a+/+	LA	143	0.1	1.63208																wt_dmso_DA01	rlbp1a+/+	LA	143	0.1	1.27753
wt__DA01	rlbp1a+/+	LA	143	1	2.15486																wt_dmso_DA01	rlbp1a+/+	LA	143	1	1.46795
wt__DA02	rlbp1a+/+	LA	143	0.0001	0.535039																wt_dmso_DA02	rlbp1a+/+	LA	143	0.0001	0.731464
wt__DA02	rlbp1a+/+	LA	143	0.001	1.78112																wt_dmso_DA02	rlbp1a+/+	LA	143	0.001	1.33459
wt__DA02	rlbp1a+/+	LA	143	0.01	3.3382																wt_dmso_DA02	rlbp1a+/+	LA	143	0.01	1.82707
wt__DA02	rlbp1a+/+	LA	143	0.1	4.85471																wt_dmso_DA02	rlbp1a+/+	LA	143	0.1	2.20334
wt__DA02	rlbp1a+/+	LA	143	1	5.58473																wt_dmso_DA02	rlbp1a+/+	LA	143	1	2.3632
wt__DA03	rlbp1a+/+	LA	143	0.0001	0.362784																wt_dmso_DA03	rlbp1a+/+	LA	143	0.0001	0.602316
wt__DA03	rlbp1a+/+	LA	143	0.001	1.76898																wt_dmso_DA03	rlbp1a+/+	LA	143	0.001	1.33003
wt__DA03	rlbp1a+/+	LA	143	0.01	6.13861																wt_dmso_DA03	rlbp1a+/+	LA	143	0.01	2.47762
wt__DA03	rlbp1a+/+	LA	143	0.1	10.0102																wt_dmso_DA03	rlbp1a+/+	LA	143	0.1	3.1639
wt__DA03	rlbp1a+/+	LA	143	1	9.06608																wt_dmso_DA03	rlbp1a+/+	LA	143	1	3.01099
wt__DA04	rlbp1a+/+	LA	143	0.0001	0.63802																wt_dmso_DA04	rlbp1a+/+	LA	143	0.0001	0.798761
wt__DA04	rlbp1a+/+	LA	143	0.001	1.43212																wt_dmso_DA04	rlbp1a+/+	LA	143	0.001	1.19671
wt__DA04	rlbp1a+/+	LA	143	0.01	3.97506																wt_dmso_DA04	rlbp1a+/+	LA	143	0.01	1.99375
wt__DA04	rlbp1a+/+	LA	143	0.1	6.65776																wt_dmso_DA04	rlbp1a+/+	LA	143	0.1	2.58026
wt__DA04	rlbp1a+/+	LA	143	1	7.29665																wt_dmso_DA04	rlbp1a+/+	LA	143	1	2.70123
wt__DA05	rlbp1a+/+	LA	143	0.0001	0.612157																wt_dmso_DA05	rlbp1a+/+	LA	143	0.0001	0.782405
wt__DA05	rlbp1a+/+	LA	143	0.001	2.35467																wt_dmso_DA05	rlbp1a+/+	LA	143	0.001	1.53449
wt__DA05	rlbp1a+/+	LA	143	0.01	7.16929																wt_dmso_DA05	rlbp1a+/+	LA	143	0.01	2.67755
wt__DA05	rlbp1a+/+	LA	143	0.1	11.7569																wt_dmso_DA05	rlbp1a+/+	LA	143	0.1	3.42884
wt__DA05	rlbp1a+/+	LA	143	1	8.7041																wt_dmso_DA05	rlbp1a+/+	LA	143	1	2.95027
wt__reDA01	rlbp1a+/+	reDA	143	0.0001	0.903863																wt_dmso_reDA01	rlbp1a+/+	reDA	143	0.0001	0.950717
wt__reDA01	rlbp1a+/+	reDA	143	0.001	3.02288																wt_dmso_reDA01	rlbp1a+/+	reDA	143	0.001	1.73864
wt__reDA01	rlbp1a+/+	reDA	143	0.01	4.7288																wt_dmso_reDA01	rlbp1a+/+	reDA	143	0.01	2.17458
wt__reDA01	rlbp1a+/+	reDA	143	0.1	6.53588																wt_dmso_reDA01	rlbp1a+/+	reDA	143	0.1	2.55654
wt__reDA01	rlbp1a+/+	reDA	143	1	7.069																wt_dmso_reDA01	rlbp1a+/+	reDA	143	1	2.65876
wt__reDA02	rlbp1a+/+	reDA	143	0.0001	0.313784																wt_dmso_reDA02	rlbp1a+/+	reDA	143	0.0001	0.560165
wt__reDA02	rlbp1a+/+	reDA	143	0.001	1.19308																wt_dmso_reDA02	rlbp1a+/+	reDA	143	0.001	1.09228
wt__reDA02	rlbp1a+/+	reDA	143	0.01	3.8329																wt_dmso_reDA02	rlbp1a+/+	reDA	143	0.01	1.95778
wt__reDA02	rlbp1a+/+	reDA	143	0.1	6.83951																wt_dmso_reDA02	rlbp1a+/+	reDA	143	0.1	2.61525
wt__reDA02	rlbp1a+/+	reDA	143	1	8.4141																wt_dmso_reDA02	rlbp1a+/+	reDA	143	1	2.90071
wt__reDA03	rlbp1a+/+	reDA	143	0.0001	0.298216																wt_dmso_reDA03	rlbp1a+/+	reDA	143	0.0001	0.546091
wt__reDA03	rlbp1a+/+	reDA	143	0.001	1.66096																wt_dmso_reDA03	rlbp1a+/+	reDA	143	0.001	1.28878
wt__reDA03	rlbp1a+/+	reDA	143	0.01	6.55114																wt_dmso_reDA03	rlbp1a+/+	reDA	143	0.01	2.55952
wt__reDA03	rlbp1a+/+	reDA	143	0.1	11.4971																wt_dmso_reDA03	rlbp1a+/+	reDA	143	0.1	3.39073
wt__reDA03	rlbp1a+/+	reDA	143	1	13.4583																wt_dmso_reDA03	rlbp1a+/+	reDA	143	1	3.66855
wt__reDA04	rlbp1a+/+	reDA	143	0.0001	0.255235																wt_dmso_reDA04	rlbp1a+/+	reDA	143	0.0001	0.505208
wt__reDA04	rlbp1a+/+	reDA	143	0.001	1.95527																wt_dmso_reDA04	rlbp1a+/+	reDA	143	0.001	1.39831
wt__reDA04	rlbp1a+/+	reDA	143	0.01	7.46853																wt_dmso_reDA04	rlbp1a+/+	reDA	143	0.01	2.73286
wt__reDA04	rlbp1a+/+	reDA	143	0.1	6.63512																wt_dmso_reDA04	rlbp1a+/+	reDA	143	0.1	2.57587
wt__reDA04	rlbp1a+/+	reDA	143	1	8.43671																wt_dmso_reDA04	rlbp1a+/+	reDA	143	1	2.9046
wt__reDA05	rlbp1a+/+	reDA	143	0.0001	0.163275																wt_dmso_reDA05	rlbp1a+/+	reDA	143	0.0001	0.404072
wt__reDA05	rlbp1a+/+	reDA	143	0.001	0.847137																wt_dmso_reDA05	rlbp1a+/+	reDA	143	0.001	0.920401
wt__reDA05	rlbp1a+/+	reDA	143	0.01	3.42312																wt_dmso_reDA05	rlbp1a+/+	reDA	143	0.01	1.85017
wt__reDA05	rlbp1a+/+	reDA	143	0.1	7.11569																wt_dmso_reDA05	rlbp1a+/+	reDA	143	0.1	2.66752
wt__reDA05	rlbp1a+/+	reDA	143	1	9.24135																wt_dmso_reDA05	rlbp1a+/+	reDA	143	1	3.03996
amut__BL01	rlbp1a-/-	BL	145	0.0001	0.0408627																amut_dmso_BL01	rlbp1a-/-	BL	145	0.0001	0.202145
amut__BL01	rlbp1a-/-	BL	145	0.001	0.108686																amut_dmso_BL01	rlbp1a-/-	BL	145	0.001	0.329676
amut__BL01	rlbp1a-/-	BL	145	0.01	0.274588																amut_dmso_BL01	rlbp1a-/-	BL	145	0.01	0.524012
amut__BL01	rlbp1a-/-	BL	145	0.1	1.29792																amut_dmso_BL01	rlbp1a-/-	BL	145	0.1	1.13926
amut__BL01	rlbp1a-/-	BL	145	1	4.91886																amut_dmso_BL01	rlbp1a-/-	BL	145	1	2.21785
amut__BL02	rlbp1a-/-	BL	145	0.0001	0.0766863																amut_dmso_BL02	rlbp1a-/-	BL	145	0.0001	0.276923
amut__BL02	rlbp1a-/-	BL	145	0.001	0.0866667																amut_dmso_BL02	rlbp1a-/-	BL	145	0.001	0.294392
amut__BL02	rlbp1a-/-	BL	145	0.01	0.278667																amut_dmso_BL02	rlbp1a-/-	BL	145	0.01	0.527889
amut__BL02	rlbp1a-/-	BL	145	0.1	0.846255																amut_dmso_BL02	rlbp1a-/-	BL	145	0.1	0.919921
amut__BL02	rlbp1a-/-	BL	145	1	3.90218																amut_dmso_BL02	rlbp1a-/-	BL	145	1	1.97539
amut__BL03	rlbp1a-/-	BL	145	0.0001	0.31598																amut_dmso_BL03	rlbp1a-/-	BL	145	0.0001	0.562121
amut__BL03	rlbp1a-/-	BL	145	0.001	0.228686																amut_dmso_BL03	rlbp1a-/-	BL	145	0.001	0.478212
amut__BL03	rlbp1a-/-	BL	145	0.01	0.635412																amut_dmso_BL03	rlbp1a-/-	BL	145	0.01	0.797127
amut__BL03	rlbp1a-/-	BL	145	0.1	2.14896																amut_dmso_BL03	rlbp1a-/-	BL	145	0.1	1.46593
amut__BL03	rlbp1a-/-	BL	145	1	7.26843																amut_dmso_BL03	rlbp1a-/-	BL	145	1	2.696
amut__BL04	rlbp1a-/-	BL	145	0.0001	0.0853529																amut_dmso_BL04	rlbp1a-/-	BL	145	0.0001	0.292152
amut__BL04	rlbp1a-/-	BL	145	0.001	0.0853922																amut_dmso_BL04	rlbp1a-/-	BL	145	0.001	0.292219
amut__BL04	rlbp1a-/-	BL	145	0.01	0.679412																amut_dmso_BL04	rlbp1a-/-	BL	145	0.01	0.824264
amut__BL04	rlbp1a-/-	BL	145	0.1	1.67255																amut_dmso_BL04	rlbp1a-/-	BL	145	0.1	1.29327
amut__BL04	rlbp1a-/-	BL	145	1	5.56924																amut_dmso_BL04	rlbp1a-/-	BL	145	1	2.35992
amut__BL05	rlbp1a-/-	BL	145	0.0001	0.111941																amut_dmso_BL05	rlbp1a-/-	BL	145	0.0001	0.334576
amut__BL05	rlbp1a-/-	BL	145	0.001	0.334745																amut_dmso_BL05	rlbp1a-/-	BL	145	0.001	0.578572
amut__BL05	rlbp1a-/-	BL	145	0.01	0.38298																amut_dmso_BL05	rlbp1a-/-	BL	145	0.01	0.618854
amut__BL05	rlbp1a-/-	BL	145	0.1	1.26169																amut_dmso_BL05	rlbp1a-/-	BL	145	0.1	1.12325
amut__BL05	rlbp1a-/-	BL	145	1	6.32053																amut_dmso_BL05	rlbp1a-/-	BL	145	1	2.51407
amut__DA01	rlbp1a-/-	LA	145	0.0001	0.0830784																amut_dmso_DA01	rlbp1a-/-	LA	145	0.0001	0.288233
amut__DA01	rlbp1a-/-	LA	145	0.001	0.791882																amut_dmso_DA01	rlbp1a-/-	LA	145	0.001	0.889878
amut__DA01	rlbp1a-/-	LA	145	0.01	4.31469																amut_dmso_DA01	rlbp1a-/-	LA	145	0.01	2.07718
amut__DA01	rlbp1a-/-	LA	145	0.1	4.66582																amut_dmso_DA01	rlbp1a-/-	LA	145	0.1	2.16005
amut__DA01	rlbp1a-/-	LA	145	1	6.13996																amut_dmso_DA01	rlbp1a-/-	LA	145	1	2.47789
amut__DA02	rlbp1a-/-	LA	145	0.0001	0.266373																amut_dmso_DA02	rlbp1a-/-	LA	145	0.0001	0.516113
amut__DA02	rlbp1a-/-	LA	145	0.001	1.04825																amut_dmso_DA02	rlbp1a-/-	LA	145	0.001	1.02384
amut__DA02	rlbp1a-/-	LA	145	0.01	4.03055																amut_dmso_DA02	rlbp1a-/-	LA	145	0.01	2.00762
amut__DA02	rlbp1a-/-	LA	145	0.1	8.84155																amut_dmso_DA02	rlbp1a-/-	LA	145	0.1	2.97347
amut__DA02	rlbp1a-/-	LA	145	1	9.96388																amut_dmso_DA02	rlbp1a-/-	LA	145	1	3.15656
amut__DA03	rlbp1a-/-	LA	145	0.0001	0.265275																amut_dmso_DA03	rlbp1a-/-	LA	145	0.0001	0.515048
amut__DA03	rlbp1a-/-	LA	145	0.001	0.342588																amut_dmso_DA03	rlbp1a-/-	LA	145	0.001	0.58531
amut__DA03	rlbp1a-/-	LA	145	0.01	0.0588039																amut_dmso_DA03	rlbp1a-/-	LA	145	0.01	0.242495
amut__DA03	rlbp1a-/-	LA	145	0.1	0.276725																amut_dmso_DA03	rlbp1a-/-	LA	145	0.1	0.526047
amut__DA03	rlbp1a-/-	LA	145	1	1.74214																amut_dmso_DA03	rlbp1a-/-	LA	145	1	1.3199
amut__DA04	rlbp1a-/-	LA	145	0.0001	0.124941																amut_dmso_DA04	rlbp1a-/-	LA	145	0.0001	0.35347
amut__DA04	rlbp1a-/-	LA	145	0.001	1.56912																amut_dmso_DA04	rlbp1a-/-	LA	145	0.001	1.25264
amut__DA04	rlbp1a-/-	LA	145	0.01	5.20684																amut_dmso_DA04	rlbp1a-/-	LA	145	0.01	2.28185
amut__DA04	rlbp1a-/-	LA	145	0.1	7.01237																amut_dmso_DA04	rlbp1a-/-	LA	145	0.1	2.64809
amut__DA04	rlbp1a-/-	LA	145	1	6.84345																amut_dmso_DA04	rlbp1a-/-	LA	145	1	2.616
amut__DA05	rlbp1a-/-	LA	145	0.0001	1.481																amut_dmso_DA05	rlbp1a-/-	LA	145	0.0001	1.21696
amut__DA05	rlbp1a-/-	LA	145	0.001	1.69416																amut_dmso_DA05	rlbp1a-/-	LA	145	0.001	1.3016
amut__DA05	rlbp1a-/-	LA	145	0.01	5.59224																amut_dmso_DA05	rlbp1a-/-	LA	145	0.01	2.36479
amut__DA05	rlbp1a-/-	LA	145	0.1	6.0321																amut_dmso_DA05	rlbp1a-/-	LA	145	0.1	2.45603
amut__DA05	rlbp1a-/-	LA	145	1	7.97784																amut_dmso_DA05	rlbp1a-/-	LA	145	1	2.82451
amut__reDA01	rlbp1a-/-	reDA	145	0.0001	0.203294																amut_dmso_reDA01	rlbp1a-/-	reDA	145	0.0001	0.450881
amut__reDA01	rlbp1a-/-	reDA	145	0.001	0.529667																amut_dmso_reDA01	rlbp1a-/-	reDA	145	0.001	0.727782
amut__reDA01	rlbp1a-/-	reDA	145	0.01	3.37294																amut_dmso_reDA01	rlbp1a-/-	reDA	145	0.01	1.83656
amut__reDA01	rlbp1a-/-	reDA	145	0.1	10.8041																amut_dmso_reDA01	rlbp1a-/-	reDA	145	0.1	3.28695
amut__reDA01	rlbp1a-/-	reDA	145	1	13.7651																amut_dmso_reDA01	rlbp1a-/-	reDA	145	1	3.71013
amut__reDA02	rlbp1a-/-	reDA	145	0.0001	0.0581176																amut_dmso_reDA02	rlbp1a-/-	reDA	145	0.0001	0.241076
amut__reDA02	rlbp1a-/-	reDA	145	0.001	0.508118																amut_dmso_reDA02	rlbp1a-/-	reDA	145	0.001	0.712824
amut__reDA02	rlbp1a-/-	reDA	145	0.01	3.24835																amut_dmso_reDA02	rlbp1a-/-	reDA	145	0.01	1.80232
amut__reDA02	rlbp1a-/-	reDA	145	0.1	8.06712																amut_dmso_reDA02	rlbp1a-/-	reDA	145	0.1	2.84027
amut__reDA02	rlbp1a-/-	reDA	145	1	11.0475																amut_dmso_reDA02	rlbp1a-/-	reDA	145	1	3.32377
amut__reDA03	rlbp1a-/-	reDA	145	0.0001	0.396569																amut_dmso_reDA03	rlbp1a-/-	reDA	145	0.0001	0.629737
amut__reDA03	rlbp1a-/-	reDA	145	0.001	1.61039																amut_dmso_reDA03	rlbp1a-/-	reDA	145	0.001	1.26901
amut__reDA03	rlbp1a-/-	reDA	145	0.01	7.89622																amut_dmso_reDA03	rlbp1a-/-	reDA	145	0.01	2.81002
amut__reDA03	rlbp1a-/-	reDA	145	0.1	6.6509																amut_dmso_reDA03	rlbp1a-/-	reDA	145	0.1	2.57893
amut__reDA03	rlbp1a-/-	reDA	145	1	5.17724																amut_dmso_reDA03	rlbp1a-/-	reDA	145	1	2.27535
amut__reDA04	rlbp1a-/-	reDA	145	0.0001	0.0750588																amut_dmso_reDA04	rlbp1a-/-	reDA	145	0.0001	0.273969
amut__reDA04	rlbp1a-/-	reDA	145	0.001	0.477471																amut_dmso_reDA04	rlbp1a-/-	reDA	145	0.001	0.690992
amut__reDA04	rlbp1a-/-	reDA	145	0.01	3.02747																amut_dmso_reDA04	rlbp1a-/-	reDA	145	0.01	1.73996
amut__reDA04	rlbp1a-/-	reDA	145	0.1	8.24394																amut_dmso_reDA04	rlbp1a-/-	reDA	145	0.1	2.87123
amut__reDA04	rlbp1a-/-	reDA	145	1	12.1569																amut_dmso_reDA04	rlbp1a-/-	reDA	145	1	3.48668
amut__reDA05	rlbp1a-/-	reDA	145	0.0001	0.114824																amut_dmso_reDA05	rlbp1a-/-	reDA	145	0.0001	0.338856
amut__reDA05	rlbp1a-/-	reDA	145	0.001	0.738882																amut_dmso_reDA05	rlbp1a-/-	reDA	145	0.001	0.859583
amut__reDA05	rlbp1a-/-	reDA	145	0.01	2.23196																amut_dmso_reDA05	rlbp1a-/-	reDA	145	0.01	1.49397
amut__reDA05	rlbp1a-/-	reDA	145	0.1	5.35461																amut_dmso_reDA05	rlbp1a-/-	reDA	145	0.1	2.314
amut__reDA05	rlbp1a-/-	reDA	145	1	8.14496																amut_dmso_reDA05	rlbp1a-/-	reDA	145	1	2.85394
wt__BL01	rlbp1a+/+	BL	145	0.0001	0.0382353																wt_dmso_BL01	rlbp1a+/+	BL	145	0.0001	0.195538
wt__BL01	rlbp1a+/+	BL	145	0.001	0.213412																wt_dmso_BL01	rlbp1a+/+	BL	145	0.001	0.461965
wt__BL01	rlbp1a+/+	BL	145	0.01	1.60286																wt_dmso_BL01	rlbp1a+/+	BL	145	0.01	1.26604
wt__BL01	rlbp1a+/+	BL	145	0.1	6.4792																wt_dmso_BL01	rlbp1a+/+	BL	145	0.1	2.54543
wt__BL01	rlbp1a+/+	BL	145	1	11.688																wt_dmso_BL01	rlbp1a+/+	BL	145	1	3.41877
wt__BL02	rlbp1a+/+	BL	145	0.0001	0.067451																wt_dmso_BL02	rlbp1a+/+	BL	145	0.0001	0.259713
wt__BL02	rlbp1a+/+	BL	145	0.001	0.34998																wt_dmso_BL02	rlbp1a+/+	BL	145	0.001	0.591591
wt__BL02	rlbp1a+/+	BL	145	0.01	0.951255																wt_dmso_BL02	rlbp1a+/+	BL	145	0.01	0.975323
wt__BL02	rlbp1a+/+	BL	145	0.1	5.69802																wt_dmso_BL02	rlbp1a+/+	BL	145	0.1	2.38705
wt__BL02	rlbp1a+/+	BL	145	1	3.7168																wt_dmso_BL02	rlbp1a+/+	BL	145	1	1.9279
wt__BL03	rlbp1a+/+	BL	145	0.0001	0.066098																wt_dmso_BL03	rlbp1a+/+	BL	145	0.0001	0.257095
wt__BL03	rlbp1a+/+	BL	145	0.001	0.461412																wt_dmso_BL03	rlbp1a+/+	BL	145	0.001	0.679273
wt__BL03	rlbp1a+/+	BL	145	0.01	1.93467																wt_dmso_BL03	rlbp1a+/+	BL	145	0.01	1.39092
wt__BL03	rlbp1a+/+	BL	145	0.1	6.81033																wt_dmso_BL03	rlbp1a+/+	BL	145	0.1	2.60966
wt__BL03	rlbp1a+/+	BL	145	1	15.6081																wt_dmso_BL03	rlbp1a+/+	BL	145	1	3.95071
wt__BL04	rlbp1a+/+	BL	145	0.0001	0.0547843																wt_dmso_BL04	rlbp1a+/+	BL	145	0.0001	0.23406
wt__BL04	rlbp1a+/+	BL	145	0.001	0.296608																wt_dmso_BL04	rlbp1a+/+	BL	145	0.001	0.544617
wt__BL04	rlbp1a+/+	BL	145	0.01	0.596863																wt_dmso_BL04	rlbp1a+/+	BL	145	0.01	0.772569
wt__BL04	rlbp1a+/+	BL	145	0.1	0.359824																wt_dmso_BL04	rlbp1a+/+	BL	145	0.1	0.599853
wt__BL04	rlbp1a+/+	BL	145	1	1.7878																wt_dmso_BL04	rlbp1a+/+	BL	145	1	1.33709
wt__BL05	rlbp1a+/+	BL	145	0.0001	0.0956471																wt_dmso_BL05	rlbp1a+/+	BL	145	0.0001	0.309269
wt__BL05	rlbp1a+/+	BL	145	0.001	0.247588																wt_dmso_BL05	rlbp1a+/+	BL	145	0.001	0.497582
wt__BL05	rlbp1a+/+	BL	145	0.01	1.51459																wt_dmso_BL05	rlbp1a+/+	BL	145	0.01	1.23069
wt__BL05	rlbp1a+/+	BL	145	0.1	5.70284																wt_dmso_BL05	rlbp1a+/+	BL	145	0.1	2.38806
wt__BL05	rlbp1a+/+	BL	145	1	11.4189																wt_dmso_BL05	rlbp1a+/+	BL	145	1	3.37919
wt__DA01	rlbp1a+/+	LA	145	0.0001	0.141039																wt_dmso_DA01	rlbp1a+/+	LA	145	0.0001	0.375552
wt__DA01	rlbp1a+/+	LA	145	0.001	1.05131																wt_dmso_DA01	rlbp1a+/+	LA	145	0.001	1.02534
wt__DA01	rlbp1a+/+	LA	145	0.01	3.31604																wt_dmso_DA01	rlbp1a+/+	LA	145	0.01	1.821
wt__DA01	rlbp1a+/+	LA	145	0.1	5.54329																wt_dmso_DA01	rlbp1a+/+	LA	145	0.1	2.35442
wt__DA01	rlbp1a+/+	LA	145	1	5.50212																wt_dmso_DA01	rlbp1a+/+	LA	145	1	2.34566
wt__DA02	rlbp1a+/+	LA	145	0.0001	0.181686																wt_dmso_DA02	rlbp1a+/+	LA	145	0.0001	0.426247
wt__DA02	rlbp1a+/+	LA	145	0.001	0.229902																wt_dmso_DA02	rlbp1a+/+	LA	145	0.001	0.479481
wt__DA02	rlbp1a+/+	LA	145	0.01	0.404745																wt_dmso_DA02	rlbp1a+/+	LA	145	0.01	0.636196
wt__DA02	rlbp1a+/+	LA	145	0.1	0.928647																wt_dmso_DA02	rlbp1a+/+	LA	145	0.1	0.963663
wt__DA02	rlbp1a+/+	LA	145	1	0.866137																wt_dmso_DA02	rlbp1a+/+	LA	145	1	0.930665
wt__DA03	rlbp1a+/+	LA	145	0.0001	0.568																wt_dmso_DA03	rlbp1a+/+	LA	145	0.0001	0.753658
wt__DA03	rlbp1a+/+	LA	145	0.001	0.903667																wt_dmso_DA03	rlbp1a+/+	LA	145	0.001	0.950614
wt__DA03	rlbp1a+/+	LA	145	0.01	2.89049																wt_dmso_DA03	rlbp1a+/+	LA	145	0.01	1.70014
wt__DA03	rlbp1a+/+	LA	145	0.1	5.67857																wt_dmso_DA03	rlbp1a+/+	LA	145	0.1	2.38297
wt__DA03	rlbp1a+/+	LA	145	1	4.58361																wt_dmso_DA03	rlbp1a+/+	LA	145	1	2.14094
wt__DA04	rlbp1a+/+	LA	145	0.0001	0.282235																wt_dmso_DA04	rlbp1a+/+	LA	145	0.0001	0.531258
wt__DA04	rlbp1a+/+	LA	145	0.001	1.7309																wt_dmso_DA04	rlbp1a+/+	LA	145	0.001	1.31564
wt__DA04	rlbp1a+/+	LA	145	0.01	7.3609																wt_dmso_DA04	rlbp1a+/+	LA	145	0.01	2.7131
wt__DA04	rlbp1a+/+	LA	145	0.1	13.7975																wt_dmso_DA04	rlbp1a+/+	LA	145	0.1	3.7145
wt__DA04	rlbp1a+/+	LA	145	1	11.667																wt_dmso_DA04	rlbp1a+/+	LA	145	1	3.4157
wt__DA05	rlbp1a+/+	LA	145	0.0001	0.24702																wt_dmso_DA05	rlbp1a+/+	LA	145	0.0001	0.497011
wt__DA05	rlbp1a+/+	LA	145	0.001	1.55059																wt_dmso_DA05	rlbp1a+/+	LA	145	0.001	1.24523
wt__DA05	rlbp1a+/+	LA	145	0.01	5.53739																wt_dmso_DA05	rlbp1a+/+	LA	145	0.01	2.35317
wt__DA05	rlbp1a+/+	LA	145	0.1	10.5393																wt_dmso_DA05	rlbp1a+/+	LA	145	0.1	3.24642
wt__DA05	rlbp1a+/+	LA	145	1	11.0329																wt_dmso_DA05	rlbp1a+/+	LA	145	1	3.32158
wt__reDA01	rlbp1a+/+	reDA	145	0.0001	0.502784																wt_dmso_reDA01	rlbp1a+/+	reDA	145	0.0001	0.709073
wt__reDA01	rlbp1a+/+	reDA	145	0.001	1.76098																wt_dmso_reDA01	rlbp1a+/+	reDA	145	0.001	1.32702
wt__reDA01	rlbp1a+/+	reDA	145	0.01	4.17382																wt_dmso_reDA01	rlbp1a+/+	reDA	145	0.01	2.04299
wt__reDA01	rlbp1a+/+	reDA	145	0.1	7.49222																wt_dmso_reDA01	rlbp1a+/+	reDA	145	0.1	2.73719
wt__reDA01	rlbp1a+/+	reDA	145	1	5.95727																wt_dmso_reDA01	rlbp1a+/+	reDA	145	1	2.44075
wt__reDA02	rlbp1a+/+	reDA	145	0.0001	0.560471																wt_dmso_reDA02	rlbp1a+/+	reDA	145	0.0001	0.748646
wt__reDA02	rlbp1a+/+	reDA	145	0.001	1.21451																wt_dmso_reDA02	rlbp1a+/+	reDA	145	0.001	1.10205
wt__reDA02	rlbp1a+/+	reDA	145	0.01	6.06631																wt_dmso_reDA02	rlbp1a+/+	reDA	145	0.01	2.46299
wt__reDA02	rlbp1a+/+	reDA	145	0.1	12.2581																wt_dmso_reDA02	rlbp1a+/+	reDA	145	0.1	3.50116
wt__reDA02	rlbp1a+/+	reDA	145	1	14.8228																wt_dmso_reDA02	rlbp1a+/+	reDA	145	1	3.85004
wt__reDA03	rlbp1a+/+	reDA	145	0.0001	0.155176																wt_dmso_reDA03	rlbp1a+/+	reDA	145	0.0001	0.393924
wt__reDA03	rlbp1a+/+	reDA	145	0.001	1.40957																wt_dmso_reDA03	rlbp1a+/+	reDA	145	0.001	1.18725
wt__reDA03	rlbp1a+/+	reDA	145	0.01	5.63341																wt_dmso_reDA03	rlbp1a+/+	reDA	145	0.01	2.37348
wt__reDA03	rlbp1a+/+	reDA	145	0.1	8.86637																wt_dmso_reDA03	rlbp1a+/+	reDA	145	0.1	2.97765
wt__reDA03	rlbp1a+/+	reDA	145	1	8.51096																wt_dmso_reDA03	rlbp1a+/+	reDA	145	1	2.91736
wt__reDA04	rlbp1a+/+	reDA	145	0.0001	0.444176																wt_dmso_reDA04	rlbp1a+/+	reDA	145	0.0001	0.666466
wt__reDA04	rlbp1a+/+	reDA	145	0.001	2.20894																wt_dmso_reDA04	rlbp1a+/+	reDA	145	0.001	1.48625
wt__reDA04	rlbp1a+/+	reDA	145	0.01	6.41945																wt_dmso_reDA04	rlbp1a+/+	reDA	145	0.01	2.53366
wt__reDA04	rlbp1a+/+	reDA	145	0.1	12.7135																wt_dmso_reDA04	rlbp1a+/+	reDA	145	0.1	3.56559
wt__reDA04	rlbp1a+/+	reDA	145	1	14.3605																wt_dmso_reDA04	rlbp1a+/+	reDA	145	1	3.78952
wt__reDA05	rlbp1a+/+	reDA	145	0.0001	0.439569																wt_dmso_reDA05	rlbp1a+/+	reDA	145	0.0001	0.663
wt__reDA05	rlbp1a+/+	reDA	145	0.001	1.28222																wt_dmso_reDA05	rlbp1a+/+	reDA	145	0.001	1.13235
wt__reDA05	rlbp1a+/+	reDA	145	0.01	3.52229																wt_dmso_reDA05	rlbp1a+/+	reDA	145	0.01	1.87678
wt__reDA05	rlbp1a+/+	reDA	145	0.1	7.95196																wt_dmso_reDA05	rlbp1a+/+	reDA	145	0.1	2.81992
wt__reDA05	rlbp1a+/+	reDA	145	1	7.84235																wt_dmso_reDA05	rlbp1a+/+	reDA	145	1	2.80042

## Sheet: Fig4B
Fig.4B																					sqrt-transformed
fish	genotype	condition	exp	intensity	amplitude		genotype	condition	intensity	variable	n	min	max	median	iqr	mean	sd	se	ci		fish	genotype	condition	exp	intensity	amplitude		genotype	condition	intensity	variable	n	min	max	median	iqr	mean	sd	se	ci
dish01_02	dbKO	BL	202	0.0001	0.0493137		WT	LA	0.0001	amplitude	30	0.08	1.338	0.627	0.464	0.643	0.339	0.062	0.127		dish01_02	dbKO	BL	202	0.0001	0.222067		WT	LA	0.0001	amplitude	30	0.283	1.157	0.792	0.295	0.769	0.231	0.042	0.086
dish01_03	WT	BL	202	0.0001	0.0623529		WT	LA	0.001	amplitude	30	0.243	4.569	1.74	2.294	1.934	1.247	0.228	0.465		dish01_03	WT	BL	202	0.0001	0.249706		WT	LA	0.001	amplitude	30	0.493	2.138	1.319	0.896	1.306	0.485	0.089	0.181
dish02_01	dbKO	BL	202	0.0001	0.106745		WT	LA	0.01	amplitude	30	0.47	8.214	4.016	3.687	3.982	2.239	0.409	0.836		dish02_01	dbKO	BL	202	0.0001	0.326719		WT	LA	0.01	amplitude	30	0.686	2.866	2.003	0.975	1.899	0.623	0.114	0.233
dish02_02	WT	BL	202	0.0001	0.140863		WT	LA	0.1	amplitude	30	0.88	16.963	7.337	5.205	6.847	3.925	0.717	1.465		dish02_02	WT	BL	202	0.0001	0.375317		WT	LA	0.1	amplitude	30	0.938	4.119	2.709	1.073	2.487	0.829	0.151	0.309
dish02_03	dbKO	BL	202	0.0001	0.0586863		WT	LA	1	amplitude	30	0.937	14.271	8.965	5.822	7.625	3.91	0.714	1.46		dish02_03	dbKO	BL	202	0.0001	0.242253		WT	LA	1	amplitude	30	0.968	3.778	2.994	1.101	2.64	0.824	0.15	0.308
dish02_04	WT	BL	202	0.0001	0.598588		WT	BL	0.0001	amplitude	23	0.062	1.201	0.367	0.367	0.434	0.321	0.067	0.139		dish02_04	WT	BL	202	0.0001	0.773685		WT	BL	0.0001	amplitude	23	0.25	1.096	0.606	0.327	0.617	0.237	0.049	0.102
dish03_01	dbKO	BL	202	0.0001	0.0589412		WT	BL	0.001	amplitude	23	0.283	4.403	1.399	1.078	1.503	0.96	0.2	0.415		dish03_01	dbKO	BL	202	0.0001	0.242778		WT	BL	0.001	amplitude	23	0.532	2.098	1.183	0.473	1.169	0.38	0.079	0.164
dish03_02	WT	BL	202	0.0001	0.533137		WT	BL	0.01	amplitude	23	0.45	10.612	4.207	2.639	4.207	2.289	0.477	0.99		dish03_02	WT	BL	202	0.0001	0.730162		WT	BL	0.01	amplitude	23	0.67	3.258	2.051	0.666	1.964	0.606	0.126	0.262
dish03_03	dbKO	BL	202	0.0001	0.179647		WT	BL	0.1	amplitude	23	0.627	10.693	5.548	4.86	5.134	2.976	0.62	1.287		dish03_03	dbKO	BL	202	0.0001	0.423848		WT	BL	0.1	amplitude	23	0.792	3.27	2.355	1.131	2.141	0.758	0.158	0.328
dish03_04	WT	BL	202	0.0001	0.304392		WT	BL	1	amplitude	23	1.066	13.675	6.823	4.94	6.821	3.689	0.769	1.595		dish03_04	WT	BL	202	0.0001	0.551717		WT	BL	1	amplitude	23	1.032	3.698	2.612	0.978	2.492	0.8	0.167	0.346
dish04_01	dbKO	BL+reDA	202	0.0001	0.415824		WT	BL+reDA	0.0001	amplitude	20	0.707	4.108	2.454	1.588	2.585	1.092	0.244	0.511		dish04_01	dbKO	BL+reDA	202	0.0001	0.644844		WT	BL+reDA	0.0001	amplitude	20	0.841	2.027	1.566	0.482	1.568	0.365	0.082	0.171
dish04_02	WT	BL+reDA	202	0.0001	2.18424		WT	BL+reDA	0.001	amplitude	20	1.013	10.869	6.272	3.866	5.897	2.753	0.616	1.289		dish04_02	WT	BL+reDA	202	0.0001	1.47792		WT	BL+reDA	0.001	amplitude	20	1.007	3.297	2.504	0.801	2.349	0.632	0.141	0.296
dish04_03	dbKO	BL+reDA	202	0.0001	0.0802745		WT	BL+reDA	0.01	amplitude	20	0.863	14.679	8.334	5.657	8.126	4.055	0.907	1.898		dish04_03	dbKO	BL+reDA	202	0.0001	0.283328		WT	BL+reDA	0.01	amplitude	20	0.929	3.831	2.887	1.017	2.74	0.806	0.18	0.377
dish05_01	WT	BL+reDA	202	0.0001	1.07173		WT	BL+reDA	0.1	amplitude	20	0.983	15.121	7.243	5.309	7.72	4.254	0.951	1.991		dish05_01	WT	BL+reDA	202	0.0001	1.03524		WT	BL+reDA	0.1	amplitude	20	0.991	3.889	2.691	0.962	2.655	0.84	0.188	0.393
dish05_02	dbKO	BL+reDA	202	0.0001	0.519804		WT	BL+reDA	1	amplitude	20	1.34	11.591	6.682	5.928	6.607	3.473	0.776	1.625		dish05_02	dbKO	BL+reDA	202	0.0001	0.720974		WT	BL+reDA	1	amplitude	20	1.158	3.405	2.585	1.176	2.467	0.741	0.166	0.347
dish05_03	WT	BL+reDA	202	0.0001	2.41322		dbKO	LA	0.0001	amplitude	31	0.055	0.793	0.267	0.231	0.31	0.193	0.035	0.071		dish05_03	WT	BL+reDA	202	0.0001	1.55345		dbKO	LA	0.0001	amplitude	31	0.234	0.89	0.517	0.218	0.531	0.171	0.031	0.063
dish05_04	dbKO	BL+reDA	202	0.0001	0.0886275		dbKO	LA	0.001	amplitude	31	0.037	3.245	0.644	0.934	0.871	0.692	0.124	0.254		dish05_04	dbKO	BL+reDA	202	0.0001	0.297704		dbKO	LA	0.001	amplitude	31	0.192	1.801	0.802	0.534	0.86	0.368	0.066	0.135
dish06_01	WT	BL+reDA	202	0.0001	0.706686		dbKO	LA	0.01	amplitude	31	0.171	5.535	2.485	3.561	2.555	1.906	0.342	0.699		dish06_01	WT	BL+reDA	202	0.0001	0.840646		dbKO	LA	0.01	amplitude	31	0.414	2.353	1.576	1.177	1.459	0.663	0.119	0.243
dish06_02	WT	BL+reDA	202	0.0001	2.71963		dbKO	LA	0.1	amplitude	31	0.233	10.197	4.012	5.228	4.365	3.106	0.558	1.139		dish06_02	WT	BL+reDA	202	0.0001	1.64913		dbKO	LA	0.1	amplitude	31	0.483	3.193	2.003	1.305	1.929	0.817	0.147	0.3
dish06_03	dbKO	BL+reDA	202	0.0001	0.483549		dbKO	LA	1	amplitude	31	0.446	11.038	3.377	5.89	4.806	3.614	0.649	1.326		dish06_03	dbKO	BL+reDA	202	0.0001	0.695377		dbKO	LA	1	amplitude	31	0.668	3.322	1.838	1.421	2.019	0.867	0.156	0.318
dish06_04	dbKO	BL+reDA	202	0.0001	0.0847059		dbKO	BL	0.0001	amplitude	22	0.049	0.681	0.096	0.121	0.17	0.16	0.034	0.071		dish06_04	dbKO	BL+reDA	202	0.0001	0.291043		dbKO	BL	0.0001	amplitude	22	0.222	0.825	0.311	0.164	0.382	0.16	0.034	0.071
plate02_A1	WT	LA	202	0.0001	0.162216		dbKO	BL	0.001	amplitude	22	0.038	2.16	0.129	0.265	0.309	0.463	0.099	0.205		plate02_A1	WT	LA	202	0.0001	0.40276		dbKO	BL	0.001	amplitude	22	0.195	1.47	0.36	0.295	0.474	0.297	0.063	0.132
plate02_A2	dbKO	LA	202	0.0001	0.427451		dbKO	BL	0.01	amplitude	22	0.086	1.758	0.354	0.404	0.522	0.478	0.102	0.212		plate02_A2	dbKO	LA	202	0.0001	0.653797		dbKO	BL	0.01	amplitude	22	0.293	1.326	0.595	0.318	0.663	0.295	0.063	0.131
plate02_A4	WT	LA	202	0.0001	0.648314		dbKO	BL	0.1	amplitude	22	0.18	4.396	1.331	1.247	1.532	1.068	0.228	0.473		plate02_A4	WT	LA	202	0.0001	0.805179		dbKO	BL	0.1	amplitude	22	0.425	2.097	1.154	0.544	1.159	0.446	0.095	0.198
plate02_A5	dbKO	LA	202	0.0001	0.0547255		dbKO	BL	1	amplitude	22	0.056	7.693	3.125	2.939	3.188	2.141	0.457	0.949		plate02_A5	dbKO	LA	202	0.0001	0.233935		dbKO	BL	1	amplitude	22	0.237	2.774	1.768	0.888	1.651	0.697	0.149	0.309
plate02_A6	WT	LA	202	0.0001	1.06237		dbKO	BL+reDA	0.0001	amplitude	24	0.062	2.022	0.448	0.423	0.507	0.455	0.093	0.192		plate02_A6	WT	LA	202	0.0001	1.03071		dbKO	BL+reDA	0.0001	amplitude	24	0.249	1.422	0.669	0.359	0.651	0.294	0.06	0.124
plate02_B2	dbKO	LA	202	0.0001	0.200588		dbKO	BL+reDA	0.001	amplitude	24	0.167	5.57	1.141	1.651	1.424	1.316	0.269	0.556		plate02_B2	dbKO	LA	202	0.0001	0.447871		dbKO	BL+reDA	0.001	amplitude	24	0.408	2.36	1.068	0.781	1.074	0.531	0.108	0.224
plate02_B3	WT	LA	202	0.0001	1.33812		dbKO	BL+reDA	0.01	amplitude	24	0.032	8.416	1.721	4.041	2.693	2.437	0.498	1.029		plate02_B3	WT	LA	202	0.0001	1.15677		dbKO	BL+reDA	0.01	amplitude	24	0.178	2.901	1.312	1.362	1.455	0.775	0.158	0.327
plate02_B4	dbKO	LA	202	0.0001	0.0596863		dbKO	BL+reDA	0.1	amplitude	24	0.366	8.273	2.103	4.465	2.952	2.625	0.536	1.108		plate02_B4	dbKO	LA	202	0.0001	0.244308		dbKO	BL+reDA	0.1	amplitude	24	0.605	2.876	1.45	1.342	1.555	0.747	0.152	0.315
plate02_B5	dbKO	LA	202	0.0001	0.503333		dbKO	BL+reDA	1	amplitude	24	0.249	9.38	1.487	2.68	2.903	2.887	0.589	1.219		plate02_B5	dbKO	LA	202	0.0001	0.70946		dbKO	BL+reDA	1	amplitude	24	0.499	3.063	1.219	0.921	1.518	0.79	0.161	0.334
plate02_B6	dbKO	LA	202	0.0001	0.723412																plate02_B6	dbKO	LA	202	0.0001	0.850536
plate02_C1	WT	LA	202	0.0001	0.664118																plate02_C1	WT	LA	202	0.0001	0.814934
plate02_C2	WT	LA	202	0.0001	0.496451																plate02_C2	WT	LA	202	0.0001	0.704593
plate02_C3	dbKO	LA	202	0.0001	0.104471																plate02_C3	dbKO	LA	202	0.0001	0.323219
plate02_C4	WT	LA	202	0.0001	0.657078																plate02_C4	WT	LA	202	0.0001	0.810604
plate02_C5	dbKO	LA	202	0.0001	0.261059																plate02_C5	dbKO	LA	202	0.0001	0.510939
plate02_C6	WT	LA	202	0.0001	0.654176																plate02_C6	WT	LA	202	0.0001	0.808812
plate02_D1	dbKO	LA	202	0.0001	0.221804																plate02_D1	dbKO	LA	202	0.0001	0.470961
plate02_D2	dbKO	LA	202	0.0001	0.48949																plate02_D2	dbKO	LA	202	0.0001	0.699636
plate02_D3	WT	LA	202	0.0001	0.344686																plate02_D3	WT	LA	202	0.0001	0.5871
plate02_D4	dbKO	LA	202	0.0001	0.0872941																plate02_D4	dbKO	LA	202	0.0001	0.295456
plate02_D5	WT	LA	202	0.0001	0.605765																plate02_D5	WT	LA	202	0.0001	0.778309
plate02_D6	WT	LA	202	0.0001	0.146686																plate02_D6	WT	LA	202	0.0001	0.382996
dish1_01	WT	BL	222	0.0001	0.658392																dish1_01	WT	BL	222	0.0001	0.811414
dish1_02	WT	BL	222	0.0001	0.517941																dish1_02	WT	BL	222	0.0001	0.719681
dish1_03	dbKO	BL	222	0.0001	0.0956863																dish1_03	dbKO	BL	222	0.0001	0.309332
dish1_04	WT	BL	222	0.0001	0.18102																dish1_04	WT	BL	222	0.0001	0.425464
dish1_05	dbKO	BL	222	0.0001	0.303353																dish1_05	dbKO	BL	222	0.0001	0.550775
dish1_06	dbKO	BL	222	0.0001	0.0895294																dish1_06	dbKO	BL	222	0.0001	0.299215
dish2_01	dbKO	BL	222	0.0001	0.0607255																dish2_01	dbKO	BL	222	0.0001	0.246425
dish2_02	dbKO	BL	222	0.0001	0.125922																dish2_02	dbKO	BL	222	0.0001	0.354854
dish2_03	WT	BL	222	0.0001	0.128647																dish2_03	WT	BL	222	0.0001	0.358674
dish2_04	WT	BL	222	0.0001	0.511294																dish2_04	WT	BL	222	0.0001	0.715048
dish2_05	WT	BL	222	0.0001	1.20067																dish2_05	WT	BL	222	0.0001	1.09575
dish2_06	dbKO	BL	222	0.0001	0.247412																dish2_06	dbKO	BL	222	0.0001	0.497405
dish3_01	dbKO	BL	222	0.0001	0.0918431																dish3_01	dbKO	BL	222	0.0001	0.303056
dish3_02	WT	BL	222	0.0001	0.367																dish3_02	WT	BL	222	0.0001	0.605805
dish3_03	dbKO	BL	222	0.0001	0.0842353																dish3_03	dbKO	BL	222	0.0001	0.290233
dish3_04	WT	BL	222	0.0001	0.943569																dish3_04	WT	BL	222	0.0001	0.971375
dish3_05	dbKO	BL	222	0.0001	0.0710392																dish3_05	dbKO	BL	222	0.0001	0.266532
dish3_06	WT	BL	222	0.0001	0.494																dish3_06	WT	BL	222	0.0001	0.702851
dish4_01	dbKO	BL+reDA	222	0.0001	1.22661																dish4_01	dbKO	BL+reDA	222	0.0001	1.10752
dish4_02	WT	BL+reDA	222	0.0001	2.62045																dish4_02	WT	BL+reDA	222	0.0001	1.61878
dish4_03	dbKO	BL+reDA	222	0.0001	0.0851961																dish4_03	dbKO	BL+reDA	222	0.0001	0.291884
dish4_04	WT	BL+reDA	222	0.0001	3.63747																dish4_04	WT	BL+reDA	222	0.0001	1.90722
dish4_05	WT	BL+reDA	222	0.0001	2.47661																dish4_05	WT	BL+reDA	222	0.0001	1.57372
dish4_06	dbKO	BL+reDA	222	0.0001	0.496255																dish4_06	dbKO	BL+reDA	222	0.0001	0.704454
dish5_01	dbKO	BL+reDA	222	0.0001	0.704078																dish5_01	dbKO	BL+reDA	222	0.0001	0.839094
dish5_02	dbKO	BL+reDA	222	0.0001	0.661059																dish5_02	dbKO	BL+reDA	222	0.0001	0.813055
dish5_03	WT	BL+reDA	222	0.0001	3.28535																dish5_03	WT	BL+reDA	222	0.0001	1.81255
dish5_04	WT	BL+reDA	222	0.0001	4.06727																dish5_04	WT	BL+reDA	222	0.0001	2.01675
dish5_05	WT	BL+reDA	222	0.0001	4.1082																dish5_05	WT	BL+reDA	222	0.0001	2.02687
dish5_06	dbKO	BL+reDA	222	0.0001	0.10802																dish5_06	dbKO	BL+reDA	222	0.0001	0.328663
dish6_01	dbKO	BL+reDA	222	0.0001	1.2519																dish6_01	dbKO	BL+reDA	222	0.0001	1.11888
dish6_02	dbKO	BL+reDA	222	0.0001	2.02208																dish6_02	dbKO	BL+reDA	222	0.0001	1.422
dish6_03	dbKO	BL+reDA	222	0.0001	0.71602																dish6_03	dbKO	BL+reDA	222	0.0001	0.846179
dish6_04	WT	BL+reDA	222	0.0001	2.08888																dish6_04	WT	BL+reDA	222	0.0001	1.4453
dish6_05	WT	BL+reDA	222	0.0001	3.5578																dish6_05	WT	BL+reDA	222	0.0001	1.88621
dish6_06	WT	BL+reDA	222	0.0001	2.43086																dish6_06	WT	BL+reDA	222	0.0001	1.55912
plate02_A1	dbKO	LA	222	0.0001	0.307588																plate02_A1	dbKO	LA	222	0.0001	0.554606
plate02_A2	WT	LA	222	0.0001	0.868608																plate02_A2	WT	LA	222	0.0001	0.931991
plate02_A3	WT	LA	222	0.0001	0.385745																plate02_A3	WT	LA	222	0.0001	0.621084
plate02_A4	dbKO	LA	222	0.0001	0.53002																plate02_A4	dbKO	LA	222	0.0001	0.728024
plate02_A5	dbKO	LA	222	0.0001	0.267039																plate02_A5	dbKO	LA	222	0.0001	0.516758
plate02_A6	WT	LA	222	0.0001	0.964118																plate02_A6	WT	LA	222	0.0001	0.981895
plate02_B1	dbKO	LA	222	0.0001	0.217961																plate02_B1	dbKO	LA	222	0.0001	0.466863
plate02_B2	WT	LA	222	0.0001	0.558529																plate02_B2	WT	LA	222	0.0001	0.747348
plate02_B3	dbKO	LA	222	0.0001	0.250373																plate02_B3	dbKO	LA	222	0.0001	0.500372
plate02_B4	WT	LA	222	0.0001	1.24018																plate02_B4	WT	LA	222	0.0001	1.11363
plate02_B5	dbKO	LA	222	0.0001	0.792608																plate02_B5	dbKO	LA	222	0.0001	0.890285
plate02_B6	WT	LA	222	0.0001	0.421961																plate02_B6	WT	LA	222	0.0001	0.649585
plate02_C1	WT	LA	222	0.0001	0.87302																plate02_C1	WT	LA	222	0.0001	0.934355
plate02_C2	dbKO	LA	222	0.0001	0.160412																plate02_C2	dbKO	LA	222	0.0001	0.400514
plate02_C3	dbKO	LA	222	0.0001	0.324941																plate02_C3	dbKO	LA	222	0.0001	0.570036
plate02_C4	WT	LA	222	0.0001	0.760098																plate02_C4	WT	LA	222	0.0001	0.871836
plate02_C5	dbKO	LA	222	0.0001	0.514824																plate02_C5	dbKO	LA	222	0.0001	0.717512
plate02_C6	WT	LA	222	0.0001	0.403059																plate02_C6	WT	LA	222	0.0001	0.634869
plate02_D1	dbKO	LA	222	0.0001	0.14502																plate02_D1	dbKO	LA	222	0.0001	0.380814
plate02_D2	WT	LA	222	0.0001	1.09763																plate02_D2	WT	LA	222	0.0001	1.04768
dish01_01	dbKO	BL	223	0.0001	0.212078																dish01_01	dbKO	BL	223	0.0001	0.46052
dish01_02	dbKO	BL	223	0.0001	0.517235																dish01_02	dbKO	BL	223	0.0001	0.719191
dish01_03	WT	BL	223	0.0001	0.107333																dish01_03	WT	BL	223	0.0001	0.327618
dish01_04	dbKO	BL	223	0.0001	0.308627																dish01_04	dbKO	BL	223	0.0001	0.555542
dish01_05	WT	BL	223	0.0001	0.39498																dish01_05	WT	BL	223	0.0001	0.628475
dish01_06	WT	BL	223	0.0001	0.523686																dish01_06	WT	BL	223	0.0001	0.723662
dish02_01	dbKO	BL	223	0.0001	0.0826667																dish02_01	dbKO	BL	223	0.0001	0.287518
dish02_02	WT	BL	223	0.0001	0.232922																dish02_02	WT	BL	223	0.0001	0.482619
dish02_03	WT	BL	223	0.0001	0.126549																dish02_03	WT	BL	223	0.0001	0.355737
dish02_04	WT	BL	223	0.0001	0.341569																dish02_04	WT	BL	223	0.0001	0.584439
dish02_05	dbKO	BL	223	0.0001	0.0972941																dish02_05	dbKO	BL	223	0.0001	0.31192
dish02_06	dbKO	BL	223	0.0001	0.145765																dish02_06	dbKO	BL	223	0.0001	0.381791
dish03_01	dbKO	BL	223	0.0001	0.680569																dish03_01	dbKO	BL	223	0.0001	0.824966
dish03_02	WT	BL	223	0.0001	0.325882																dish03_02	WT	BL	223	0.0001	0.570861
dish03_03	WT	BL	223	0.0001	0.117882																dish03_03	WT	BL	223	0.0001	0.34334
dish03_05	WT	BL	223	0.0001	1.17306																dish03_05	WT	BL	223	0.0001	1.08308
dish03_06	dbKO	BL	223	0.0001	0.0826667																dish03_06	dbKO	BL	223	0.0001	0.287518
dish04_01	WT	BL+reDA	223	0.0001	0.849235																dish04_01	WT	BL+reDA	223	0.0001	0.92154
dish04_03	WT	BL+reDA	223	0.0001	1.69104																dish04_03	WT	BL+reDA	223	0.0001	1.3004
dish04_04	dbKO	BL+reDA	223	0.0001	0.192																dish04_04	dbKO	BL+reDA	223	0.0001	0.438178
dish04_05	dbKO	BL+reDA	223	0.0001	0.462471																dish04_05	dbKO	BL+reDA	223	0.0001	0.680052
dish04_06	dbKO	BL+reDA	223	0.0001	0.571569																dish04_06	dbKO	BL+reDA	223	0.0001	0.756022
dish05_01	dbKO	BL+reDA	223	0.0001	0.27749																dish05_01	dbKO	BL+reDA	223	0.0001	0.526773
dish05_03	dbKO	BL+reDA	223	0.0001	0.433765																dish05_03	dbKO	BL+reDA	223	0.0001	0.658608
dish05_04	WT	BL+reDA	223	0.0001	4.10045																dish05_04	WT	BL+reDA	223	0.0001	2.02496
dish05_05	WT	BL+reDA	223	0.0001	2.25567																dish05_05	WT	BL+reDA	223	0.0001	1.50189
dish05_06	dbKO	BL+reDA	223	0.0001	0.478588																dish05_06	dbKO	BL+reDA	223	0.0001	0.691801
dish06_02	dbKO	BL+reDA	223	0.0001	0.0617647																dish06_02	dbKO	BL+reDA	223	0.0001	0.248525
dish06_03	WT	BL+reDA	223	0.0001	1.48063																dish06_03	WT	BL+reDA	223	0.0001	1.21681
dish06_04	WT	BL+reDA	223	0.0001	3.94563																dish06_04	WT	BL+reDA	223	0.0001	1.98636
dish06_05	dbKO	BL+reDA	223	0.0001	0.349902																dish06_05	dbKO	BL+reDA	223	0.0001	0.591525
dish06_06	dbKO	BL+reDA	223	0.0001	0.406118																dish06_06	dbKO	BL+reDA	223	0.0001	0.637274
plate02_A1	WT	LA	223	0.0001	1.03947																plate02_A1	WT	LA	223	0.0001	1.01954
plate02_A2	dbKO	LA	223	0.0001	0.274745																plate02_A2	dbKO	LA	223	0.0001	0.524161
plate02_A3	dbKO	LA	223	0.0001	0.275176																plate02_A3	dbKO	LA	223	0.0001	0.524573
plate02_A4	WT	LA	223	0.0001	0.541314																plate02_A4	WT	LA	223	0.0001	0.73574
plate02_A6	dbKO	LA	223	0.0001	0.685843																plate02_A6	dbKO	LA	223	0.0001	0.828156
plate02_B1	WT	LA	223	0.0001	0.589686																plate02_B1	WT	LA	223	0.0001	0.76791
plate02_B2	WT	LA	223	0.0001	0.0798235																plate02_B2	WT	LA	223	0.0001	0.282531
plate02_B3	dbKO	LA	223	0.0001	0.392784																plate02_B3	dbKO	LA	223	0.0001	0.626725
plate02_B4	WT	LA	223	0.0001	0.535608																plate02_B4	WT	LA	223	0.0001	0.731852
plate02_B5	dbKO	LA	223	0.0001	0.215745																plate02_B5	dbKO	LA	223	0.0001	0.464484
plate02_B6	WT	LA	223	0.0001	1.06867																plate02_B6	WT	LA	223	0.0001	1.03376
plate02_C1	dbKO	LA	223	0.0001	0.355608																plate02_C1	dbKO	LA	223	0.0001	0.596329
plate02_C2	WT	LA	223	0.0001	0.249588																plate02_C2	WT	LA	223	0.0001	0.499588
plate02_C3	dbKO	LA	223	0.0001	0.111216																plate02_C3	dbKO	LA	223	0.0001	0.33349
plate02_C4	WT	LA	223	0.0001	0.114255																plate02_C4	WT	LA	223	0.0001	0.338016
plate02_C5	dbKO	LA	223	0.0001	0.19749																plate02_C5	dbKO	LA	223	0.0001	0.444399
plate02_C6	dbKO	LA	223	0.0001	0.312471																plate02_C6	dbKO	LA	223	0.0001	0.558991
plate02_D1	WT	LA	223	0.0001	0.724392																plate02_D1	WT	LA	223	0.0001	0.851112
plate02_D2	dbKO	LA	223	0.0001	0.153294																plate02_D2	dbKO	LA	223	0.0001	0.391528
dish01_02	dbKO	BL	202	0.001	0.127294																dish01_02	dbKO	BL	202	0.001	0.356783
dish01_03	WT	BL	202	0.001	0.283																dish01_03	WT	BL	202	0.001	0.531977
dish02_01	dbKO	BL	202	0.001	0.0876078																dish02_01	dbKO	BL	202	0.001	0.295986
dish02_02	WT	BL	202	0.001	0.454333																dish02_02	WT	BL	202	0.001	0.674043
dish02_03	dbKO	BL	202	0.001	0.0380784																dish02_03	dbKO	BL	202	0.001	0.195137
dish02_04	WT	BL	202	0.001	1.53755																dish02_04	WT	BL	202	0.001	1.23998
dish03_01	dbKO	BL	202	0.001	0.244078																dish03_01	dbKO	BL	202	0.001	0.494043
dish03_02	WT	BL	202	0.001	0.517765																dish03_02	WT	BL	202	0.001	0.719559
dish03_03	dbKO	BL	202	0.001	0.0937647																dish03_03	dbKO	BL	202	0.001	0.30621
dish03_04	WT	BL	202	0.001	0.860255																dish03_04	WT	BL	202	0.001	0.927499
dish04_01	dbKO	BL+reDA	202	0.001	1.47982																dish04_01	dbKO	BL+reDA	202	0.001	1.21648
dish04_02	WT	BL+reDA	202	0.001	4.36067																dish04_02	WT	BL+reDA	202	0.001	2.08822
dish04_03	dbKO	BL+reDA	202	0.001	0.166667																dish04_03	dbKO	BL+reDA	202	0.001	0.408248
dish05_01	WT	BL+reDA	202	0.001	1.0132																dish05_01	WT	BL+reDA	202	0.001	1.00658
dish05_02	dbKO	BL+reDA	202	0.001	1.05151																dish05_02	dbKO	BL+reDA	202	0.001	1.02543
dish05_03	WT	BL+reDA	202	0.001	5.9688																dish05_03	WT	BL+reDA	202	0.001	2.44311
dish05_04	dbKO	BL+reDA	202	0.001	0.188255																dish05_04	dbKO	BL+reDA	202	0.001	0.433884
dish06_01	WT	BL+reDA	202	0.001	1.05986																dish06_01	WT	BL+reDA	202	0.001	1.0295
dish06_02	WT	BL+reDA	202	0.001	8.15159																dish06_02	WT	BL+reDA	202	0.001	2.8551
dish06_03	dbKO	BL+reDA	202	0.001	0.174706																dish06_03	dbKO	BL+reDA	202	0.001	0.417978
dish06_04	dbKO	BL+reDA	202	0.001	0.193451																dish06_04	dbKO	BL+reDA	202	0.001	0.439831
plate02_A1	WT	LA	202	0.001	0.388882																plate02_A1	WT	LA	202	0.001	0.623604
plate02_A2	dbKO	LA	202	0.001	1.41204																plate02_A2	dbKO	LA	202	0.001	1.18829
plate02_A4	WT	LA	202	0.001	3.08135																plate02_A4	WT	LA	202	0.001	1.75538
plate02_A5	dbKO	LA	202	0.001	0.0367843																plate02_A5	dbKO	LA	202	0.001	0.191792
plate02_A6	WT	LA	202	0.001	3.06665																plate02_A6	WT	LA	202	0.001	1.75118
plate02_B2	dbKO	LA	202	0.001	0.643706																plate02_B2	dbKO	LA	202	0.001	0.802313
plate02_B3	WT	LA	202	0.001	3.80965																plate02_B3	WT	LA	202	0.001	1.95183
plate02_B4	dbKO	LA	202	0.001	1.195																plate02_B4	dbKO	LA	202	0.001	1.09316
plate02_B5	dbKO	LA	202	0.001	1.40461																plate02_B5	dbKO	LA	202	0.001	1.18516
plate02_B6	dbKO	LA	202	0.001	1.69457																plate02_B6	dbKO	LA	202	0.001	1.30176
plate02_C1	WT	LA	202	0.001	2.715																plate02_C1	WT	LA	202	0.001	1.64773
plate02_C2	WT	LA	202	0.001	2.92567																plate02_C2	WT	LA	202	0.001	1.71046
plate02_C3	dbKO	LA	202	0.001	0.522627																plate02_C3	dbKO	LA	202	0.001	0.72293
plate02_C4	WT	LA	202	0.001	1.24176																plate02_C4	WT	LA	202	0.001	1.11434
plate02_C5	dbKO	LA	202	0.001	0.158706																plate02_C5	dbKO	LA	202	0.001	0.398379
plate02_C6	WT	LA	202	0.001	0.527922																plate02_C6	WT	LA	202	0.001	0.726582
plate02_D1	dbKO	LA	202	0.001	0.533569																plate02_D1	dbKO	LA	202	0.001	0.730458
plate02_D2	dbKO	LA	202	0.001	1.59376																plate02_D2	dbKO	LA	202	0.001	1.26244
plate02_D3	WT	LA	202	0.001	0.482216																plate02_D3	WT	LA	202	0.001	0.694418
plate02_D4	dbKO	LA	202	0.001	0.949765																plate02_D4	dbKO	LA	202	0.001	0.974559
plate02_D5	WT	LA	202	0.001	2.23006																plate02_D5	WT	LA	202	0.001	1.49334
plate02_D6	WT	LA	202	0.001	0.327765																plate02_D6	WT	LA	202	0.001	0.572507
dish1_01	WT	BL	222	0.001	2.23741																dish1_01	WT	BL	222	0.001	1.4958
dish1_02	WT	BL	222	0.001	1.37918																dish1_02	WT	BL	222	0.001	1.17438
dish1_03	dbKO	BL	222	0.001	2.16047																dish1_03	dbKO	BL	222	0.001	1.46985
dish1_04	WT	BL	222	0.001	1.03994																dish1_04	WT	BL	222	0.001	1.01978
dish1_05	dbKO	BL	222	0.001	0.131314																dish1_05	dbKO	BL	222	0.001	0.362372
dish1_06	dbKO	BL	222	0.001	0.572961																dish1_06	dbKO	BL	222	0.001	0.756942
dish2_01	dbKO	BL	222	0.001	0.111961																dish2_01	dbKO	BL	222	0.001	0.334605
dish2_02	dbKO	BL	222	0.001	0.197686																dish2_02	dbKO	BL	222	0.001	0.444619
dish2_03	WT	BL	222	0.001	1.74365																dish2_03	WT	BL	222	0.001	1.32047
dish2_04	WT	BL	222	0.001	2.49151																dish2_04	WT	BL	222	0.001	1.57845
dish2_05	WT	BL	222	0.001	3.16027																dish2_05	WT	BL	222	0.001	1.77772
dish2_06	dbKO	BL	222	0.001	0.389647																dish2_06	dbKO	BL	222	0.001	0.624217
dish3_01	dbKO	BL	222	0.001	0.206216																dish3_01	dbKO	BL	222	0.001	0.45411
dish3_02	WT	BL	222	0.001	1.63071																dish3_02	WT	BL	222	0.001	1.27699
dish3_03	dbKO	BL	222	0.001	0.0540784																dish3_03	dbKO	BL	222	0.001	0.232548
dish3_04	WT	BL	222	0.001	2.06682																dish3_04	WT	BL	222	0.001	1.43765
dish3_05	dbKO	BL	222	0.001	0.0868431																dish3_05	dbKO	BL	222	0.001	0.294692
dish3_06	WT	BL	222	0.001	1.52925																dish3_06	WT	BL	222	0.001	1.23663
dish4_01	dbKO	BL+reDA	222	0.001	2.7449																dish4_01	dbKO	BL+reDA	222	0.001	1.65677
dish4_02	WT	BL+reDA	222	0.001	6.57541																dish4_02	WT	BL+reDA	222	0.001	2.56426
dish4_03	dbKO	BL+reDA	222	0.001	0.462392																dish4_03	dbKO	BL+reDA	222	0.001	0.679994
dish4_04	WT	BL+reDA	222	0.001	10.0927																dish4_04	WT	BL+reDA	222	0.001	3.1769
dish4_05	WT	BL+reDA	222	0.001	6.67894																dish4_05	WT	BL+reDA	222	0.001	2.58436
dish4_06	dbKO	BL+reDA	222	0.001	1.08553																dish4_06	dbKO	BL+reDA	222	0.001	1.04189
dish5_01	dbKO	BL+reDA	222	0.001	1.6528																dish5_01	dbKO	BL+reDA	222	0.001	1.28561
dish5_02	dbKO	BL+reDA	222	0.001	0.516098																dish5_02	dbKO	BL+reDA	222	0.001	0.7184
dish5_03	WT	BL+reDA	222	0.001	6.76198																dish5_03	WT	BL+reDA	222	0.001	2.60038
dish5_04	WT	BL+reDA	222	0.001	9.14806																dish5_04	WT	BL+reDA	222	0.001	3.02458
dish5_05	WT	BL+reDA	222	0.001	8.06163																dish5_05	WT	BL+reDA	222	0.001	2.8393
dish5_06	dbKO	BL+reDA	222	0.001	0.388922																dish5_06	dbKO	BL+reDA	222	0.001	0.623636
dish6_01	dbKO	BL+reDA	222	0.001	3.50608																dish6_01	dbKO	BL+reDA	222	0.001	1.87245
dish6_02	dbKO	BL+reDA	222	0.001	5.56986																dish6_02	dbKO	BL+reDA	222	0.001	2.36006
dish6_03	dbKO	BL+reDA	222	0.001	2.07743																dish6_03	dbKO	BL+reDA	222	0.001	1.44133
dish6_04	WT	BL+reDA	222	0.001	4.02237																dish6_04	WT	BL+reDA	222	0.001	2.00559
dish6_05	WT	BL+reDA	222	0.001	7.24398																dish6_05	WT	BL+reDA	222	0.001	2.69146
dish6_06	WT	BL+reDA	222	0.001	4.42973																dish6_06	WT	BL+reDA	222	0.001	2.10469
plate02_A1	dbKO	LA	222	0.001	0.554333																plate02_A1	dbKO	LA	222	0.001	0.744536
plate02_A2	WT	LA	222	0.001	3.17222																plate02_A2	WT	LA	222	0.001	1.78107
plate02_A3	WT	LA	222	0.001	1.50067																plate02_A3	WT	LA	222	0.001	1.22502
plate02_A4	dbKO	LA	222	0.001	1.05031																plate02_A4	dbKO	LA	222	0.001	1.02485
plate02_A5	dbKO	LA	222	0.001	1.07418																plate02_A5	dbKO	LA	222	0.001	1.03642
plate02_A6	WT	LA	222	0.001	2.04031																plate02_A6	WT	LA	222	0.001	1.4284
plate02_B1	dbKO	LA	222	0.001	1.51633																plate02_B1	dbKO	LA	222	0.001	1.23139
plate02_B2	WT	LA	222	0.001	1.18896																plate02_B2	WT	LA	222	0.001	1.09039
plate02_B3	dbKO	LA	222	0.001	0.259157																plate02_B3	dbKO	LA	222	0.001	0.509075
plate02_B4	WT	LA	222	0.001	3.56957																plate02_B4	WT	LA	222	0.001	1.88933
plate02_B5	dbKO	LA	222	0.001	3.24486																plate02_B5	dbKO	LA	222	0.001	1.80135
plate02_B6	WT	LA	222	0.001	1.44184																plate02_B6	WT	LA	222	0.001	1.20077
plate02_C1	WT	LA	222	0.001	3.03302																plate02_C1	WT	LA	222	0.001	1.74156
plate02_C2	dbKO	LA	222	0.001	0.323941																plate02_C2	dbKO	LA	222	0.001	0.569158
plate02_C3	dbKO	LA	222	0.001	1.82108																plate02_C3	dbKO	LA	222	0.001	1.34947
plate02_C4	WT	LA	222	0.001	3.54322																plate02_C4	WT	LA	222	0.001	1.88234
plate02_C5	dbKO	LA	222	0.001	1.55914																plate02_C5	dbKO	LA	222	0.001	1.24865
plate02_C6	WT	LA	222	0.001	1.70737																plate02_C6	WT	LA	222	0.001	1.30666
plate02_D1	dbKO	LA	222	0.001	0.961529																plate02_D1	dbKO	LA	222	0.001	0.980576
plate02_D2	WT	LA	222	0.001	4.56949																plate02_D2	WT	LA	222	0.001	2.13764
dish01_01	dbKO	BL	223	0.001	0.657588																dish01_01	dbKO	BL	223	0.001	0.810918
dish01_02	dbKO	BL	223	0.001	0.0894706																dish01_02	dbKO	BL	223	0.001	0.299116
dish01_03	WT	BL	223	0.001	0.344745																dish01_03	WT	BL	223	0.001	0.58715
dish01_04	dbKO	BL	223	0.001	0.424647																dish01_04	dbKO	BL	223	0.001	0.651649
dish01_05	WT	BL	223	0.001	0.768549																dish01_05	WT	BL	223	0.001	0.876669
dish01_06	WT	BL	223	0.001	1.39888																dish01_06	WT	BL	223	0.001	1.18274
dish02_01	dbKO	BL	223	0.001	0.120294																dish02_01	dbKO	BL	223	0.001	0.346834
dish02_02	WT	BL	223	0.001	1.59396																dish02_02	WT	BL	223	0.001	1.26252
dish02_03	WT	BL	223	0.001	1.15578																dish02_03	WT	BL	223	0.001	1.07507
dish02_04	WT	BL	223	0.001	1.19716																dish02_04	WT	BL	223	0.001	1.09415
dish02_05	dbKO	BL	223	0.001	0.135157																dish02_05	dbKO	BL	223	0.001	0.367637
dish02_06	dbKO	BL	223	0.001	0.0511569																dish02_06	dbKO	BL	223	0.001	0.226179
dish03_01	dbKO	BL	223	0.001	0.764706																dish03_01	dbKO	BL	223	0.001	0.874475
dish03_02	WT	BL	223	0.001	2.04155																dish03_02	WT	BL	223	0.001	1.42883
dish03_03	WT	BL	223	0.001	0.738157																dish03_03	WT	BL	223	0.001	0.859161
dish03_05	WT	BL	223	0.001	4.40333																dish03_05	WT	BL	223	0.001	2.09841
dish03_06	dbKO	BL	223	0.001	0.055451																dish03_06	dbKO	BL	223	0.001	0.23548
dish04_01	WT	BL+reDA	223	0.001	2.71547																dish04_01	WT	BL+reDA	223	0.001	1.64787
dish04_03	WT	BL+reDA	223	0.001	3.80092																dish04_03	WT	BL+reDA	223	0.001	1.9496
dish04_04	dbKO	BL+reDA	223	0.001	0.510706																dish04_04	dbKO	BL+reDA	223	0.001	0.714637
dish04_05	dbKO	BL+reDA	223	0.001	2.28567																dish04_05	dbKO	BL+reDA	223	0.001	1.51184
dish04_06	dbKO	BL+reDA	223	0.001	2.90184																dish04_06	dbKO	BL+reDA	223	0.001	1.70348
dish05_01	dbKO	BL+reDA	223	0.001	0.175784																dish05_01	dbKO	BL+reDA	223	0.001	0.419266
dish05_03	dbKO	BL+reDA	223	0.001	1.22443																dish05_03	dbKO	BL+reDA	223	0.001	1.10654
dish05_04	WT	BL+reDA	223	0.001	10.8691																dish05_04	WT	BL+reDA	223	0.001	3.29683
dish05_05	WT	BL+reDA	223	0.001	4.05749																dish05_05	WT	BL+reDA	223	0.001	2.01432
dish05_06	dbKO	BL+reDA	223	0.001	2.14767																dish05_06	dbKO	BL+reDA	223	0.001	1.46549
dish06_02	dbKO	BL+reDA	223	0.001	0.605078																dish06_02	dbKO	BL+reDA	223	0.001	0.777868
dish06_03	WT	BL+reDA	223	0.001	5.06492																dish06_03	WT	BL+reDA	223	0.001	2.25054
dish06_04	WT	BL+reDA	223	0.001	7.86573																dish06_04	WT	BL+reDA	223	0.001	2.80459
dish06_05	dbKO	BL+reDA	223	0.001	1.86476																dish06_05	dbKO	BL+reDA	223	0.001	1.36556
dish06_06	dbKO	BL+reDA	223	0.001	1.19584																dish06_06	dbKO	BL+reDA	223	0.001	1.09355
plate02_A1	WT	LA	223	0.001	2.72318																plate02_A1	WT	LA	223	0.001	1.6502
plate02_A2	dbKO	LA	223	0.001	1.07475																plate02_A2	dbKO	LA	223	0.001	1.0367
plate02_A3	dbKO	LA	223	0.001	0.355176																plate02_A3	dbKO	LA	223	0.001	0.595967
plate02_A4	WT	LA	223	0.001	0.522686																plate02_A4	WT	LA	223	0.001	0.72297
plate02_A6	dbKO	LA	223	0.001	0.215059																plate02_A6	dbKO	LA	223	0.001	0.463744
plate02_B1	WT	LA	223	0.001	0.608863																plate02_B1	WT	LA	223	0.001	0.780297
plate02_B2	WT	LA	223	0.001	0.243078																plate02_B2	WT	LA	223	0.001	0.49303
plate02_B3	dbKO	LA	223	0.001	0.902059																plate02_B3	dbKO	LA	223	0.001	0.949768
plate02_B4	WT	LA	223	0.001	2.89884																plate02_B4	WT	LA	223	0.001	1.7026
plate02_B5	dbKO	LA	223	0.001	0.383431																plate02_B5	dbKO	LA	223	0.001	0.619218
plate02_B6	WT	LA	223	0.001	1.23441																plate02_B6	WT	LA	223	0.001	1.11104
plate02_C1	dbKO	LA	223	0.001	0.377412																plate02_C1	dbKO	LA	223	0.001	0.614338
plate02_C2	WT	LA	223	0.001	1.77324																plate02_C2	WT	LA	223	0.001	1.33163
plate02_C3	dbKO	LA	223	0.001	0.0765294																plate02_C3	dbKO	LA	223	0.001	0.276639
plate02_C4	WT	LA	223	0.001	0.442843																plate02_C4	WT	LA	223	0.001	0.665465
plate02_C5	dbKO	LA	223	0.001	0.563941																plate02_C5	dbKO	LA	223	0.001	0.75096
plate02_C6	dbKO	LA	223	0.001	0.148333																plate02_C6	dbKO	LA	223	0.001	0.385141
plate02_D1	WT	LA	223	0.001	1.02045																plate02_D1	WT	LA	223	0.001	1.01017
plate02_D2	dbKO	LA	223	0.001	0.384176																plate02_D2	dbKO	LA	223	0.001	0.61982
dish01_02	dbKO	BL	202	0.01	0.493314																dish01_02	dbKO	BL	202	0.01	0.702363
dish01_03	WT	BL	202	0.01	0.470255																dish01_03	WT	BL	202	0.01	0.685751
dish02_01	dbKO	BL	202	0.01	0.35498																dish02_01	dbKO	BL	202	0.01	0.595802
dish02_02	WT	BL	202	0.01	1.1152																dish02_02	WT	BL	202	0.01	1.05603
dish02_03	dbKO	BL	202	0.01	0.263647																dish02_03	dbKO	BL	202	0.01	0.513466
dish02_04	WT	BL	202	0.01	10.6125																dish02_04	WT	BL	202	0.01	3.25768
dish03_01	dbKO	BL	202	0.01	0.0877647																dish03_01	dbKO	BL	202	0.01	0.296251
dish03_02	WT	BL	202	0.01	4.20716																dish03_02	WT	BL	202	0.01	2.05114
dish03_03	dbKO	BL	202	0.01	0.390373																dish03_03	dbKO	BL	202	0.01	0.624798
dish03_04	WT	BL	202	0.01	0.449529																dish03_04	WT	BL	202	0.01	0.67047
dish04_01	dbKO	BL+reDA	202	0.01	4.31498																dish04_01	dbKO	BL+reDA	202	0.01	2.07725
dish04_02	WT	BL+reDA	202	0.01	5.22239																dish04_02	WT	BL+reDA	202	0.01	2.28526
dish04_03	dbKO	BL+reDA	202	0.01	0.425																dish04_03	dbKO	BL+reDA	202	0.01	0.65192
dish05_01	WT	BL+reDA	202	0.01	1.51125																dish05_01	WT	BL+reDA	202	0.01	1.22933
dish05_02	dbKO	BL+reDA	202	0.01	0.583549																dish05_02	dbKO	BL+reDA	202	0.01	0.763904
dish05_03	WT	BL+reDA	202	0.01	7.70708																dish05_03	WT	BL+reDA	202	0.01	2.77616
dish05_04	dbKO	BL+reDA	202	0.01	0.0316275																dish05_04	dbKO	BL+reDA	202	0.01	0.177841
dish06_01	WT	BL+reDA	202	0.01	0.863176																dish06_01	WT	BL+reDA	202	0.01	0.929073
dish06_02	WT	BL+reDA	202	0.01	13.5177																dish06_02	WT	BL+reDA	202	0.01	3.67665
dish06_03	dbKO	BL+reDA	202	0.01	1.24104																dish06_03	dbKO	BL+reDA	202	0.01	1.11402
dish06_04	dbKO	BL+reDA	202	0.01	0.666333																dish06_04	dbKO	BL+reDA	202	0.01	0.816292
plate02_A1	WT	LA	202	0.01	0.592745																plate02_A1	WT	LA	202	0.01	0.769899
plate02_A2	dbKO	LA	202	0.01	3.84418																plate02_A2	dbKO	LA	202	0.01	1.96066
plate02_A4	WT	LA	202	0.01	0.470294																plate02_A4	WT	LA	202	0.01	0.68578
plate02_A5	dbKO	LA	202	0.01	0.273588																plate02_A5	dbKO	LA	202	0.01	0.523057
plate02_A6	WT	LA	202	0.01	5.67167																plate02_A6	WT	LA	202	0.01	2.38153
plate02_B2	dbKO	LA	202	0.01	0.171196																plate02_B2	dbKO	LA	202	0.01	0.413758
plate02_B3	WT	LA	202	0.01	7.22657																plate02_B3	WT	LA	202	0.01	2.68823
plate02_B4	dbKO	LA	202	0.01	5.10302																plate02_B4	dbKO	LA	202	0.01	2.25899
plate02_B5	dbKO	LA	202	0.01	4.76314																plate02_B5	dbKO	LA	202	0.01	2.18246
plate02_B6	dbKO	LA	202	0.01	4.61649																plate02_B6	dbKO	LA	202	0.01	2.1486
plate02_C1	WT	LA	202	0.01	6.4089																plate02_C1	WT	LA	202	0.01	2.53158
plate02_C2	WT	LA	202	0.01	6.15149																plate02_C2	WT	LA	202	0.01	2.48022
plate02_C3	dbKO	LA	202	0.01	1.43992																plate02_C3	dbKO	LA	202	0.01	1.19997
plate02_C4	WT	LA	202	0.01	1.03765																plate02_C4	WT	LA	202	0.01	1.01865
plate02_C5	dbKO	LA	202	0.01	0.513235																plate02_C5	dbKO	LA	202	0.01	0.716404
plate02_C6	WT	LA	202	0.01	2.07037																plate02_C6	WT	LA	202	0.01	1.43888
plate02_D1	dbKO	LA	202	0.01	0.199627																plate02_D1	dbKO	LA	202	0.01	0.446797
plate02_D2	dbKO	LA	202	0.01	4.75061																plate02_D2	dbKO	LA	202	0.01	2.17959
plate02_D3	WT	LA	202	0.01	1.26149																plate02_D3	WT	LA	202	0.01	1.12316
plate02_D4	dbKO	LA	202	0.01	5.53506																plate02_D4	dbKO	LA	202	0.01	2.35267
plate02_D5	WT	LA	202	0.01	4.8678																plate02_D5	WT	LA	202	0.01	2.20631
plate02_D6	WT	LA	202	0.01	0.644157																plate02_D6	WT	LA	202	0.01	0.802594
dish1_01	WT	BL	222	0.01	5.80102																dish1_01	WT	BL	222	0.01	2.40853
dish1_02	WT	BL	222	0.01	3.67124																dish1_02	WT	BL	222	0.01	1.91605
dish1_03	dbKO	BL	222	0.01	0.353627																dish1_03	dbKO	BL	222	0.01	0.594666
dish1_04	WT	BL	222	0.01	3.35047																dish1_04	WT	BL	222	0.01	1.83043
dish1_05	dbKO	BL	222	0.01	0.195333																dish1_05	dbKO	BL	222	0.01	0.441965
dish1_06	dbKO	BL	222	0.01	0.251235																dish1_06	dbKO	BL	222	0.01	0.501234
dish2_01	dbKO	BL	222	0.01	0.420824																dish2_01	dbKO	BL	222	0.01	0.648709
dish2_02	dbKO	BL	222	0.01	0.672549																dish2_02	dbKO	BL	222	0.01	0.820091
dish2_03	WT	BL	222	0.01	6.54069																dish2_03	WT	BL	222	0.01	2.55748
dish2_04	WT	BL	222	0.01	5.79686																dish2_04	WT	BL	222	0.01	2.40767
dish2_05	WT	BL	222	0.01	5.11265																dish2_05	WT	BL	222	0.01	2.26112
dish2_06	dbKO	BL	222	0.01	1.10747																dish2_06	dbKO	BL	222	0.01	1.05236
dish3_01	dbKO	BL	222	0.01	1.75804																dish3_01	dbKO	BL	222	0.01	1.32591
dish3_02	WT	BL	222	0.01	5.47106																dish3_02	WT	BL	222	0.01	2.33903
dish3_03	dbKO	BL	222	0.01	0.414667																dish3_03	dbKO	BL	222	0.01	0.643946
dish3_04	WT	BL	222	0.01	3.80865																dish3_04	WT	BL	222	0.01	1.95158
dish3_05	dbKO	BL	222	0.01	0.214745																dish3_05	dbKO	BL	222	0.01	0.463406
dish3_06	WT	BL	222	0.01	3.67504																dish3_06	WT	BL	222	0.01	1.91704
dish4_01	dbKO	BL+reDA	222	0.01	4.78737																dish4_01	dbKO	BL+reDA	222	0.01	2.18801
dish4_02	WT	BL+reDA	222	0.01	10.4468																dish4_02	WT	BL+reDA	222	0.01	3.23215
dish4_03	dbKO	BL+reDA	222	0.01	0.470588																dish4_03	dbKO	BL+reDA	222	0.01	0.685994
dish4_04	WT	BL+reDA	222	0.01	13.8345																dish4_04	WT	BL+reDA	222	0.01	3.71947
dish4_05	WT	BL+reDA	222	0.01	8.2371																dish4_05	WT	BL+reDA	222	0.01	2.87003
dish4_06	dbKO	BL+reDA	222	0.01	1.78788																dish4_06	dbKO	BL+reDA	222	0.01	1.33712
dish5_01	dbKO	BL+reDA	222	0.01	2.91892																dish5_01	dbKO	BL+reDA	222	0.01	1.70849
dish5_02	dbKO	BL+reDA	222	0.01	1.30647																dish5_02	dbKO	BL+reDA	222	0.01	1.14301
dish5_03	WT	BL+reDA	222	0.01	9.73855																dish5_03	WT	BL+reDA	222	0.01	3.12066
dish5_04	WT	BL+reDA	222	0.01	12.5286																dish5_04	WT	BL+reDA	222	0.01	3.53958
dish5_05	WT	BL+reDA	222	0.01	11.8871																dish5_05	WT	BL+reDA	222	0.01	3.44777
dish5_06	dbKO	BL+reDA	222	0.01	0.865647																dish5_06	dbKO	BL+reDA	222	0.01	0.930402
dish6_01	dbKO	BL+reDA	222	0.01	6.1208																dish6_01	dbKO	BL+reDA	222	0.01	2.47403
dish6_02	dbKO	BL+reDA	222	0.01	8.41641																dish6_02	dbKO	BL+reDA	222	0.01	2.90111
dish6_03	dbKO	BL+reDA	222	0.01	2.19647																dish6_03	dbKO	BL+reDA	222	0.01	1.48205
dish6_04	WT	BL+reDA	222	0.01	6.7222																dish6_04	WT	BL+reDA	222	0.01	2.59272
dish6_05	WT	BL+reDA	222	0.01	9.18618																dish6_05	WT	BL+reDA	222	0.01	3.03087
dish6_06	WT	BL+reDA	222	0.01	5.74604																dish6_06	WT	BL+reDA	222	0.01	2.39709
plate02_A1	dbKO	LA	222	0.01	2.57775																plate02_A1	dbKO	LA	222	0.01	1.60554
plate02_A2	WT	LA	222	0.01	5.61918																plate02_A2	WT	LA	222	0.01	2.37048
plate02_A3	WT	LA	222	0.01	4.40775																plate02_A3	WT	LA	222	0.01	2.09946
plate02_A4	dbKO	LA	222	0.01	3.94249																plate02_A4	dbKO	LA	222	0.01	1.98557
plate02_A5	dbKO	LA	222	0.01	3.81718																plate02_A5	dbKO	LA	222	0.01	1.95376
plate02_A6	WT	LA	222	0.01	4.8829																plate02_A6	WT	LA	222	0.01	2.20973
plate02_B1	dbKO	LA	222	0.01	5.17882																plate02_B1	dbKO	LA	222	0.01	2.2757
plate02_B2	WT	LA	222	0.01	3.35525																plate02_B2	WT	LA	222	0.01	1.83174
plate02_B3	dbKO	LA	222	0.01	1.02288																plate02_B3	dbKO	LA	222	0.01	1.01138
plate02_B4	WT	LA	222	0.01	5.60073																plate02_B4	WT	LA	222	0.01	2.36659
plate02_B5	dbKO	LA	222	0.01	4.58916																plate02_B5	dbKO	LA	222	0.01	2.14223
plate02_B6	WT	LA	222	0.01	4.22025																plate02_B6	WT	LA	222	0.01	2.05433
plate02_C1	WT	LA	222	0.01	3.81257																plate02_C1	WT	LA	222	0.01	1.95258
plate02_C2	dbKO	LA	222	0.01	1.06102																plate02_C2	dbKO	LA	222	0.01	1.03006
plate02_C3	dbKO	LA	222	0.01	2.48482																plate02_C3	dbKO	LA	222	0.01	1.57633
plate02_C4	WT	LA	222	0.01	7.03708																plate02_C4	WT	LA	222	0.01	2.65275
plate02_C5	dbKO	LA	222	0.01	5.27304																plate02_C5	dbKO	LA	222	0.01	2.29631
plate02_C6	WT	LA	222	0.01	4.42649																plate02_C6	WT	LA	222	0.01	2.10392
plate02_D1	dbKO	LA	222	0.01	3.81565																plate02_D1	dbKO	LA	222	0.01	1.95337
plate02_D2	WT	LA	222	0.01	8.21375																plate02_D2	WT	LA	222	0.01	2.86596
dish01_01	dbKO	BL	223	0.01	1.26684																dish01_01	dbKO	BL	223	0.01	1.12554
dish01_02	dbKO	BL	223	0.01	0.194294																dish01_02	dbKO	BL	223	0.01	0.440788
dish01_03	WT	BL	223	0.01	2.48488																dish01_03	WT	BL	223	0.01	1.57635
dish01_04	dbKO	BL	223	0.01	0.0858039																dish01_04	dbKO	BL	223	0.01	0.292923
dish01_05	WT	BL	223	0.01	2.4988																dish01_05	WT	BL	223	0.01	1.58076
dish01_06	WT	BL	223	0.01	4.46818																dish01_06	WT	BL	223	0.01	2.11381
dish02_01	dbKO	BL	223	0.01	0.677196																dish02_01	dbKO	BL	223	0.01	0.822919
dish02_02	WT	BL	223	0.01	5.25512																dish02_02	WT	BL	223	0.01	2.2924
dish02_03	WT	BL	223	0.01	4.25486																dish02_03	WT	BL	223	0.01	2.06273
dish02_04	WT	BL	223	0.01	2.85076																dish02_04	WT	BL	223	0.01	1.68842
dish02_05	dbKO	BL	223	0.01	0.309941																dish02_05	dbKO	BL	223	0.01	0.556724
dish02_06	dbKO	BL	223	0.01	0.29149																dish02_06	dbKO	BL	223	0.01	0.539898
dish03_01	dbKO	BL	223	0.01	1.5859																dish03_01	dbKO	BL	223	0.01	1.25933
dish03_02	WT	BL	223	0.01	4.86796																dish03_02	WT	BL	223	0.01	2.20635
dish03_03	WT	BL	223	0.01	2.59759																dish03_03	WT	BL	223	0.01	1.6117
dish03_05	WT	BL	223	0.01	7.40667																dish03_05	WT	BL	223	0.01	2.72152
dish03_06	dbKO	BL	223	0.01	0.0995882																dish03_06	dbKO	BL	223	0.01	0.315576
dish04_01	WT	BL+reDA	223	0.01	3.75847																dish04_01	WT	BL+reDA	223	0.01	1.93868
dish04_03	WT	BL+reDA	223	0.01	3.6611																dish04_03	WT	BL+reDA	223	0.01	1.9134
dish04_04	dbKO	BL+reDA	223	0.01	0.347451																dish04_04	dbKO	BL+reDA	223	0.01	0.58945
dish04_05	dbKO	BL+reDA	223	0.01	5.54894																dish04_05	dbKO	BL+reDA	223	0.01	2.35562
dish04_06	dbKO	BL+reDA	223	0.01	6.57006																dish04_06	dbKO	BL+reDA	223	0.01	2.56321
dish05_01	dbKO	BL+reDA	223	0.01	0.851333																dish05_01	dbKO	BL+reDA	223	0.01	0.922677
dish05_03	dbKO	BL+reDA	223	0.01	4.65343																dish05_03	dbKO	BL+reDA	223	0.01	2.15718
dish05_04	WT	BL+reDA	223	0.01	14.6787																dish05_04	WT	BL+reDA	223	0.01	3.83129
dish05_05	WT	BL+reDA	223	0.01	4.93363																dish05_05	WT	BL+reDA	223	0.01	2.22118
dish05_06	dbKO	BL+reDA	223	0.01	3.22702																dish05_06	dbKO	BL+reDA	223	0.01	1.79639
dish06_02	dbKO	BL+reDA	223	0.01	0.217412																dish06_02	dbKO	BL+reDA	223	0.01	0.466274
dish06_03	WT	BL+reDA	223	0.01	8.43102																dish06_03	WT	BL+reDA	223	0.01	2.90362
dish06_04	WT	BL+reDA	223	0.01	9.89965																dish06_04	WT	BL+reDA	223	0.01	3.14637
dish06_05	dbKO	BL+reDA	223	0.01	5.42953																dish06_05	dbKO	BL+reDA	223	0.01	2.33014
dish06_06	dbKO	BL+reDA	223	0.01	1.65412																dish06_06	dbKO	BL+reDA	223	0.01	1.28613
plate02_A1	WT	LA	223	0.01	6.15608																plate02_A1	WT	LA	223	0.01	2.48114
plate02_A2	dbKO	LA	223	0.01	4.2529																plate02_A2	dbKO	LA	223	0.01	2.06226
plate02_A3	dbKO	LA	223	0.01	0.737725																plate02_A3	dbKO	LA	223	0.01	0.858909
plate02_A4	WT	LA	223	0.01	3.0472																plate02_A4	WT	LA	223	0.01	1.74562
plate02_A6	dbKO	LA	223	0.01	1.08624																plate02_A6	dbKO	LA	223	0.01	1.04223
plate02_B1	WT	LA	223	0.01	3.03659																plate02_B1	WT	LA	223	0.01	1.74258
plate02_B2	WT	LA	223	0.01	1.93902																plate02_B2	WT	LA	223	0.01	1.39249
plate02_B3	dbKO	LA	223	0.01	3.32857																plate02_B3	dbKO	LA	223	0.01	1.82444
plate02_B4	WT	LA	223	0.01	1.87565																plate02_B4	WT	LA	223	0.01	1.36954
plate02_B5	dbKO	LA	223	0.01	1.2678																plate02_B5	dbKO	LA	223	0.01	1.12597
plate02_B6	WT	LA	223	0.01	1.89567																plate02_B6	WT	LA	223	0.01	1.37683
plate02_C1	dbKO	LA	223	0.01	0.969569																plate02_C1	dbKO	LA	223	0.01	0.984667
plate02_C2	WT	LA	223	0.01	7.24959																plate02_C2	WT	LA	223	0.01	2.69251
plate02_C3	dbKO	LA	223	0.01	0.48502																plate02_C3	dbKO	LA	223	0.01	0.696433
plate02_C4	WT	LA	223	0.01	3.4689																plate02_C4	WT	LA	223	0.01	1.8625
plate02_C5	dbKO	LA	223	0.01	0.749902																plate02_C5	dbKO	LA	223	0.01	0.865969
plate02_C6	dbKO	LA	223	0.01	0.262706																plate02_C6	dbKO	LA	223	0.01	0.512548
plate02_D1	WT	LA	223	0.01	2.81747																plate02_D1	WT	LA	223	0.01	1.67853
plate02_D2	dbKO	LA	223	0.01	1.10063																plate02_D2	dbKO	LA	223	0.01	1.04911
dish01_02	dbKO	BL	202	0.1	0.970804																dish01_02	dbKO	BL	202	0.1	0.985294
dish01_03	WT	BL	202	0.1	0.636235																dish01_03	WT	BL	202	0.1	0.797644
dish02_01	dbKO	BL	202	0.1	1.80833																dish02_01	dbKO	BL	202	0.1	1.34474
dish02_02	WT	BL	202	0.1	2.24053																dish02_02	WT	BL	202	0.1	1.49684
dish02_03	dbKO	BL	202	0.1	1.82541																dish02_03	dbKO	BL	202	0.1	1.35108
dish02_04	WT	BL	202	0.1	2.80835																dish02_04	WT	BL	202	0.1	1.67581
dish03_01	dbKO	BL	202	0.1	0.216176																dish03_01	dbKO	BL	202	0.1	0.464948
dish03_02	WT	BL	202	0.1	7.88714																dish03_02	WT	BL	202	0.1	2.8084
dish03_03	dbKO	BL	202	0.1	1.89416																dish03_03	dbKO	BL	202	0.1	1.37628
dish03_04	WT	BL	202	0.1	1.20833																dish03_04	WT	BL	202	0.1	1.09924
dish04_01	dbKO	BL+reDA	202	0.1	7.22492																dish04_01	dbKO	BL+reDA	202	0.1	2.68792
dish04_02	WT	BL+reDA	202	0.1	4.70953																dish04_02	WT	BL+reDA	202	0.1	2.17015
dish04_03	dbKO	BL+reDA	202	0.1	0.75751																dish04_03	dbKO	BL+reDA	202	0.1	0.87035
dish05_01	WT	BL+reDA	202	0.1	1.71629																dish05_01	WT	BL+reDA	202	0.1	1.31007
dish05_02	dbKO	BL+reDA	202	0.1	1.07204																dish05_02	dbKO	BL+reDA	202	0.1	1.03539
dish05_03	WT	BL+reDA	202	0.1	7.19922																dish05_03	WT	BL+reDA	202	0.1	2.68314
dish05_04	dbKO	BL+reDA	202	0.1	0.365902																dish05_04	dbKO	BL+reDA	202	0.1	0.604898
dish06_01	WT	BL+reDA	202	0.1	0.982882																dish06_01	WT	BL+reDA	202	0.1	0.991404
dish06_02	WT	BL+reDA	202	0.1	14.9709																dish06_02	WT	BL+reDA	202	0.1	3.86922
dish06_03	dbKO	BL+reDA	202	0.1	2.276																dish06_03	dbKO	BL+reDA	202	0.1	1.50864
dish06_04	dbKO	BL+reDA	202	0.1	0.380353																dish06_04	dbKO	BL+reDA	202	0.1	0.616728
plate02_A1	WT	LA	202	0.1	1.25212																plate02_A1	WT	LA	202	0.1	1.11898
plate02_A2	dbKO	LA	202	0.1	6.66798																plate02_A2	dbKO	LA	202	0.1	2.58224
plate02_A4	WT	LA	202	0.1	1.17622																plate02_A4	WT	LA	202	0.1	1.08453
plate02_A5	dbKO	LA	202	0.1	0.508471																plate02_A5	dbKO	LA	202	0.1	0.713071
plate02_A6	WT	LA	202	0.1	8.80818																plate02_A6	WT	LA	202	0.1	2.96786
plate02_B2	dbKO	LA	202	0.1	0.460882																plate02_B2	dbKO	LA	202	0.1	0.678883
plate02_B3	WT	LA	202	0.1	11.8058																plate02_B3	WT	LA	202	0.1	3.43596
plate02_B4	dbKO	LA	202	0.1	9.23547																plate02_B4	dbKO	LA	202	0.1	3.03899
plate02_B5	dbKO	LA	202	0.1	2.45237																plate02_B5	dbKO	LA	202	0.1	1.56601
plate02_B6	dbKO	LA	202	0.1	7.43543																plate02_B6	dbKO	LA	202	0.1	2.7268
plate02_C1	WT	LA	202	0.1	4.02539																plate02_C1	WT	LA	202	0.1	2.00634
plate02_C2	WT	LA	202	0.1	8.82229																plate02_C2	WT	LA	202	0.1	2.97023
plate02_C3	dbKO	LA	202	0.1	2.14829																plate02_C3	dbKO	LA	202	0.1	1.46571
plate02_C4	WT	LA	202	0.1	1.3398																plate02_C4	WT	LA	202	0.1	1.1575
plate02_C5	dbKO	LA	202	0.1	1.02678																plate02_C5	dbKO	LA	202	0.1	1.0133
plate02_C6	WT	LA	202	0.1	3.48447																plate02_C6	WT	LA	202	0.1	1.86667
plate02_D1	dbKO	LA	202	0.1	0.233137																plate02_D1	dbKO	LA	202	0.1	0.482843
plate02_D2	dbKO	LA	202	0.1	8.18173																plate02_D2	dbKO	LA	202	0.1	2.86037
plate02_D3	WT	LA	202	0.1	2.0699																plate02_D3	WT	LA	202	0.1	1.43872
plate02_D4	dbKO	LA	202	0.1	10.197																plate02_D4	dbKO	LA	202	0.1	3.19328
plate02_D5	WT	LA	202	0.1	3.01878																plate02_D5	WT	LA	202	0.1	1.73746
plate02_D6	WT	LA	202	0.1	0.88																plate02_D6	WT	LA	202	0.1	0.938083
dish1_01	WT	BL	222	0.1	8.65151																dish1_01	WT	BL	222	0.1	2.94134
dish1_02	WT	BL	222	0.1	6.64102																dish1_02	WT	BL	222	0.1	2.57702
dish1_03	dbKO	BL	222	0.1	0.320412																dish1_03	dbKO	BL	222	0.1	0.566049
dish1_04	WT	BL	222	0.1	5.59231																dish1_04	WT	BL	222	0.1	2.36481
dish1_05	dbKO	BL	222	0.1	1.29784																dish1_05	dbKO	BL	222	0.1	1.13923
dish1_06	dbKO	BL	222	0.1	1.72598																dish1_06	dbKO	BL	222	0.1	1.31377
dish2_01	dbKO	BL	222	0.1	1.36406																dish2_01	dbKO	BL	222	0.1	1.16793
dish2_02	dbKO	BL	222	0.1	2.06008																dish2_02	dbKO	BL	222	0.1	1.4353
dish2_03	WT	BL	222	0.1	9.44202																dish2_03	WT	BL	222	0.1	3.07279
dish2_04	WT	BL	222	0.1	7.53204																dish2_04	WT	BL	222	0.1	2.74446
dish2_05	WT	BL	222	0.1	6.69865																dish2_05	WT	BL	222	0.1	2.58817
dish2_06	dbKO	BL	222	0.1	3.26978																dish2_06	dbKO	BL	222	0.1	1.80825
dish3_01	dbKO	BL	222	0.1	4.3958																dish3_01	dbKO	BL	222	0.1	2.09662
dish3_02	WT	BL	222	0.1	4.12008																dish3_02	WT	BL	222	0.1	2.0298
dish3_03	dbKO	BL	222	0.1	0.548843																dish3_03	dbKO	BL	222	0.1	0.740839
dish3_04	WT	BL	222	0.1	0.626569																dish3_04	WT	BL	222	0.1	0.791561
dish3_05	dbKO	BL	222	0.1	0.997314																dish3_05	dbKO	BL	222	0.1	0.998656
dish3_06	WT	BL	222	0.1	5.86686																dish3_06	WT	BL	222	0.1	2.42216
dish4_01	dbKO	BL+reDA	222	0.1	5.42355																dish4_01	dbKO	BL+reDA	222	0.1	2.32885
dish4_02	WT	BL+reDA	222	0.1	10.4239																dish4_02	WT	BL+reDA	222	0.1	3.22861
dish4_03	dbKO	BL+reDA	222	0.1	0.616804																dish4_03	dbKO	BL+reDA	222	0.1	0.785369
dish4_04	WT	BL+reDA	222	0.1	10.7844																dish4_04	WT	BL+reDA	222	0.1	3.28397
dish4_05	WT	BL+reDA	222	0.1	9.48478																dish4_05	WT	BL+reDA	222	0.1	3.07974
dish4_06	dbKO	BL+reDA	222	0.1	2.488																dish4_06	dbKO	BL+reDA	222	0.1	1.57734
dish5_01	dbKO	BL+reDA	222	0.1	2.64692																dish5_01	dbKO	BL+reDA	222	0.1	1.62694
dish5_02	dbKO	BL+reDA	222	0.1	1.24476																dish5_02	dbKO	BL+reDA	222	0.1	1.11569
dish5_03	WT	BL+reDA	222	0.1	6.69963																dish5_03	WT	BL+reDA	222	0.1	2.58836
dish5_04	WT	BL+reDA	222	0.1	8.43198																dish5_04	WT	BL+reDA	222	0.1	2.90379
dish5_05	WT	BL+reDA	222	0.1	12.5813																dish5_05	WT	BL+reDA	222	0.1	3.54701
dish5_06	dbKO	BL+reDA	222	0.1	1.33445																dish5_06	dbKO	BL+reDA	222	0.1	1.15518
dish6_01	dbKO	BL+reDA	222	0.1	5.56433																dish6_01	dbKO	BL+reDA	222	0.1	2.35888
dish6_02	dbKO	BL+reDA	222	0.1	7.20922																dish6_02	dbKO	BL+reDA	222	0.1	2.685
dish6_03	dbKO	BL+reDA	222	0.1	1.97147																dish6_03	dbKO	BL+reDA	222	0.1	1.40409
dish6_04	WT	BL+reDA	222	0.1	6.33067																dish6_04	WT	BL+reDA	222	0.1	2.51608
dish6_05	WT	BL+reDA	222	0.1	8.03737																dish6_05	WT	BL+reDA	222	0.1	2.83503
dish6_06	WT	BL+reDA	222	0.1	6.14157																dish6_06	WT	BL+reDA	222	0.1	2.47822
plate02_A1	dbKO	LA	222	0.1	5.06312																plate02_A1	dbKO	LA	222	0.1	2.25014
plate02_A2	WT	LA	222	0.1	9.21416																plate02_A2	WT	LA	222	0.1	3.03548
plate02_A3	WT	LA	222	0.1	6.68698																plate02_A3	WT	LA	222	0.1	2.58592
plate02_A4	dbKO	LA	222	0.1	6.52273																plate02_A4	dbKO	LA	222	0.1	2.55396
plate02_A5	dbKO	LA	222	0.1	6.03792																plate02_A5	dbKO	LA	222	0.1	2.45722
plate02_A6	WT	LA	222	0.1	7.79567																plate02_A6	WT	LA	222	0.1	2.79207
plate02_B1	dbKO	LA	222	0.1	8.46747																plate02_B1	dbKO	LA	222	0.1	2.90989
plate02_B2	WT	LA	222	0.1	7.31608																plate02_B2	WT	LA	222	0.1	2.70483
plate02_B3	dbKO	LA	222	0.1	2.05286																plate02_B3	dbKO	LA	222	0.1	1.43278
plate02_B4	WT	LA	222	0.1	8.69775																plate02_B4	WT	LA	222	0.1	2.94919
plate02_B5	dbKO	LA	222	0.1	7.45688																plate02_B5	dbKO	LA	222	0.1	2.73073
plate02_B6	WT	LA	222	0.1	7.30833																plate02_B6	WT	LA	222	0.1	2.70339
plate02_C1	WT	LA	222	0.1	7.35757																plate02_C1	WT	LA	222	0.1	2.71248
plate02_C2	dbKO	LA	222	0.1	1.96606																plate02_C2	dbKO	LA	222	0.1	1.40216
plate02_C3	dbKO	LA	222	0.1	4.01161																plate02_C3	dbKO	LA	222	0.1	2.0029
plate02_C4	WT	LA	222	0.1	11.5787																plate02_C4	WT	LA	222	0.1	3.40274
plate02_C5	dbKO	LA	222	0.1	8.11575																plate02_C5	dbKO	LA	222	0.1	2.84881
plate02_C6	WT	LA	222	0.1	7.99869																plate02_C6	WT	LA	222	0.1	2.82819
plate02_D1	dbKO	LA	222	0.1	8.76369																plate02_D1	dbKO	LA	222	0.1	2.96035
plate02_D2	WT	LA	222	0.1	13.0985																plate02_D2	WT	LA	222	0.1	3.61919
dish01_01	dbKO	BL	223	0.1	2.70853																dish01_01	dbKO	BL	223	0.1	1.64576
dish01_02	dbKO	BL	223	0.1	1.17645																dish01_02	dbKO	BL	223	0.1	1.08464
dish01_03	WT	BL	223	0.1	4.42447																dish01_03	WT	BL	223	0.1	2.10344
dish01_04	dbKO	BL	223	0.1	0.705294																dish01_04	dbKO	BL	223	0.1	0.839818
dish01_05	WT	BL	223	0.1	0.633137																dish01_05	WT	BL	223	0.1	0.795699
dish01_06	WT	BL	223	0.1	7.23737																dish01_06	WT	BL	223	0.1	2.69024
dish02_01	dbKO	BL	223	0.1	2.19257																dish02_01	dbKO	BL	223	0.1	1.48073
dish02_02	WT	BL	223	0.1	1.96669																dish02_02	WT	BL	223	0.1	1.40239
dish02_03	WT	BL	223	0.1	7.92122																dish02_03	WT	BL	223	0.1	2.81447
dish02_04	WT	BL	223	0.1	4.62559																dish02_04	WT	BL	223	0.1	2.15072
dish02_05	dbKO	BL	223	0.1	1.19257																dish02_05	dbKO	BL	223	0.1	1.09205
dish02_06	dbKO	BL	223	0.1	0.180235																dish02_06	dbKO	BL	223	0.1	0.424541
dish03_01	dbKO	BL	223	0.1	2.58031																dish03_01	dbKO	BL	223	0.1	1.60634
dish03_02	WT	BL	223	0.1	5.07969																dish03_02	WT	BL	223	0.1	2.25382
dish03_03	WT	BL	223	0.1	5.54816																dish03_03	WT	BL	223	0.1	2.35545
dish03_05	WT	BL	223	0.1	10.6931																dish03_05	WT	BL	223	0.1	3.27003
dish03_06	dbKO	BL	223	0.1	0.274941																dish03_06	dbKO	BL	223	0.1	0.524348
dish04_01	WT	BL+reDA	223	0.1	1.76704																dish04_01	WT	BL+reDA	223	0.1	1.3293
dish04_03	WT	BL+reDA	223	0.1	2.95437																dish04_03	WT	BL+reDA	223	0.1	1.71883
dish04_04	dbKO	BL+reDA	223	0.1	0.71651																dish04_04	dbKO	BL+reDA	223	0.1	0.846469
dish04_05	dbKO	BL+reDA	223	0.1	2.2349																dish04_05	dbKO	BL+reDA	223	0.1	1.49496
dish04_06	dbKO	BL+reDA	223	0.1	8.27298																dish04_06	dbKO	BL+reDA	223	0.1	2.87628
dish05_01	dbKO	BL+reDA	223	0.1	1.14037																dish05_01	dbKO	BL+reDA	223	0.1	1.06788
dish05_03	dbKO	BL+reDA	223	0.1	6.53237																dish05_03	dbKO	BL+reDA	223	0.1	2.55585
dish05_04	WT	BL+reDA	223	0.1	15.121																dish05_04	WT	BL+reDA	223	0.1	3.88857
dish05_05	WT	BL+reDA	223	0.1	5.3702																dish05_05	WT	BL+reDA	223	0.1	2.31737
dish05_06	dbKO	BL+reDA	223	0.1	2.55129																dish05_06	dbKO	BL+reDA	223	0.1	1.59728
dish06_02	dbKO	BL+reDA	223	0.1	0.529471																dish06_02	dbKO	BL+reDA	223	0.1	0.727647
dish06_03	WT	BL+reDA	223	0.1	7.28765																dish06_03	WT	BL+reDA	223	0.1	2.69956
dish06_04	WT	BL+reDA	223	0.1	13.4099																dish06_04	WT	BL+reDA	223	0.1	3.66195
dish06_05	dbKO	BL+reDA	223	0.1	6.97241																dish06_05	dbKO	BL+reDA	223	0.1	2.64053
dish06_06	dbKO	BL+reDA	223	0.1	1.31302																dish06_06	dbKO	BL+reDA	223	0.1	1.14587
plate02_A1	WT	LA	223	0.1	8.63731																plate02_A1	WT	LA	223	0.1	2.93893
plate02_A2	dbKO	LA	223	0.1	6.2741																plate02_A2	dbKO	LA	223	0.1	2.50481
plate02_A3	dbKO	LA	223	0.1	2.94702																plate02_A3	dbKO	LA	223	0.1	1.71669
plate02_A4	WT	LA	223	0.1	8.40047																plate02_A4	WT	LA	223	0.1	2.89836
plate02_A6	dbKO	LA	223	0.1	4.14984																plate02_A6	dbKO	LA	223	0.1	2.03712
plate02_B1	WT	LA	223	0.1	6.67312																plate02_B1	WT	LA	223	0.1	2.58324
plate02_B2	WT	LA	223	0.1	7.26339																plate02_B2	WT	LA	223	0.1	2.69507
plate02_B3	dbKO	LA	223	0.1	5.55912																plate02_B3	dbKO	LA	223	0.1	2.35778
plate02_B4	WT	LA	223	0.1	3.848																plate02_B4	WT	LA	223	0.1	1.96163
plate02_B5	dbKO	LA	223	0.1	2.43576																plate02_B5	dbKO	LA	223	0.1	1.56069
plate02_B6	WT	LA	223	0.1	1.81251																plate02_B6	WT	LA	223	0.1	1.34629
plate02_C1	dbKO	LA	223	0.1	1.95231																plate02_C1	dbKO	LA	223	0.1	1.39725
plate02_C2	WT	LA	223	0.1	16.9633																plate02_C2	WT	LA	223	0.1	4.11865
plate02_C3	dbKO	LA	223	0.1	1.357																plate02_C3	dbKO	LA	223	0.1	1.1649
plate02_C4	WT	LA	223	0.1	10.1852																plate02_C4	WT	LA	223	0.1	3.19143
plate02_C5	dbKO	LA	223	0.1	1.53173																plate02_C5	dbKO	LA	223	0.1	1.23763
plate02_C6	dbKO	LA	223	0.1	0.402804																plate02_C6	dbKO	LA	223	0.1	0.634668
plate02_D1	WT	LA	223	0.1	7.89024																plate02_D1	WT	LA	223	0.1	2.80896
plate02_D2	dbKO	LA	223	0.1	1.69569																plate02_D2	dbKO	LA	223	0.1	1.30219
dish01_02	dbKO	BL	202	1	1.4091																dish01_02	dbKO	BL	202	1	1.18705
dish01_03	WT	BL	202	1	1.06559																dish01_03	WT	BL	202	1	1.03227
dish02_01	dbKO	BL	202	1	4.42682																dish02_01	dbKO	BL	202	1	2.104
dish02_02	WT	BL	202	1	2.28398																dish02_02	WT	BL	202	1	1.51128
dish02_03	dbKO	BL	202	1	3.63867																dish02_03	dbKO	BL	202	1	1.90753
dish02_04	WT	BL	202	1	1.62849																dish02_04	WT	BL	202	1	1.27612
dish03_01	dbKO	BL	202	1	0.0563137																dish03_01	dbKO	BL	202	1	0.237305
dish03_02	WT	BL	202	1	10.0519																dish03_02	WT	BL	202	1	3.17047
dish03_03	dbKO	BL	202	1	3.46353																dish03_03	dbKO	BL	202	1	1.86106
dish03_04	WT	BL	202	1	1.39388																dish03_04	WT	BL	202	1	1.18063
dish04_01	dbKO	BL+reDA	202	1	7.88461																dish04_01	dbKO	BL+reDA	202	1	2.80795
dish04_02	WT	BL+reDA	202	1	2.45378																dish04_02	WT	BL+reDA	202	1	1.56646
dish04_03	dbKO	BL+reDA	202	1	0.773137																dish04_03	dbKO	BL+reDA	202	1	0.879282
dish05_01	WT	BL+reDA	202	1	1.34031																dish05_01	WT	BL+reDA	202	1	1.15772
dish05_02	dbKO	BL+reDA	202	1	1.2																dish05_02	dbKO	BL+reDA	202	1	1.09545
dish05_03	WT	BL+reDA	202	1	4.91124																dish05_03	WT	BL+reDA	202	1	2.21613
dish05_04	dbKO	BL+reDA	202	1	0.279961																dish05_04	dbKO	BL+reDA	202	1	0.529113
dish06_01	WT	BL+reDA	202	1	1.42049																dish06_01	WT	BL+reDA	202	1	1.19184
dish06_02	WT	BL+reDA	202	1	9.77575																dish06_02	WT	BL+reDA	202	1	3.12662
dish06_03	dbKO	BL+reDA	202	1	2.89953																dish06_03	dbKO	BL+reDA	202	1	1.7028
dish06_04	dbKO	BL+reDA	202	1	0.24902																dish06_04	dbKO	BL+reDA	202	1	0.499019
plate02_A1	WT	LA	202	1	1.84541																plate02_A1	WT	LA	202	1	1.35846
plate02_A2	dbKO	LA	202	1	11.0011																plate02_A2	dbKO	LA	202	1	3.31679
plate02_A4	WT	LA	202	1	1.45398																plate02_A4	WT	LA	202	1	1.20581
plate02_A5	dbKO	LA	202	1	0.446157																plate02_A5	dbKO	LA	202	1	0.66795
plate02_A6	WT	LA	202	1	10.3889																plate02_A6	WT	LA	202	1	3.22318
plate02_B2	dbKO	LA	202	1	0.782216																plate02_B2	dbKO	LA	202	1	0.88443
plate02_B3	WT	LA	202	1	6.82306																plate02_B3	WT	LA	202	1	2.6121
plate02_B4	dbKO	LA	202	1	3.51294																plate02_B4	dbKO	LA	202	1	1.87428
plate02_B5	dbKO	LA	202	1	2.27382																plate02_B5	dbKO	LA	202	1	1.50792
plate02_B6	dbKO	LA	202	1	3.87802																plate02_B6	dbKO	LA	202	1	1.96927
plate02_C1	WT	LA	202	1	4.7259																plate02_C1	WT	LA	202	1	2.17391
plate02_C2	WT	LA	202	1	9.41492																plate02_C2	WT	LA	202	1	3.06837
plate02_C3	dbKO	LA	202	1	2.69914																plate02_C3	dbKO	LA	202	1	1.64291
plate02_C4	WT	LA	202	1	1.56843																plate02_C4	WT	LA	202	1	1.25237
plate02_C5	dbKO	LA	202	1	0.994882																plate02_C5	dbKO	LA	202	1	0.997438
plate02_C6	WT	LA	202	1	3.46933																plate02_C6	WT	LA	202	1	1.86261
plate02_D1	dbKO	LA	202	1	0.583667																plate02_D1	dbKO	LA	202	1	0.763981
plate02_D2	dbKO	LA	202	1	10.136																plate02_D2	dbKO	LA	202	1	3.18371
plate02_D3	WT	LA	202	1	2.74014																plate02_D3	WT	LA	202	1	1.65534
plate02_D4	dbKO	LA	202	1	1.40839																plate02_D4	dbKO	LA	202	1	1.18676
plate02_D5	WT	LA	202	1	4.26614																plate02_D5	WT	LA	202	1	2.06546
plate02_D6	WT	LA	202	1	0.936804																plate02_D6	WT	LA	202	1	0.967886
dish1_01	WT	BL	222	1	8.42994																dish1_01	WT	BL	222	1	2.90344
dish1_02	WT	BL	222	1	8.86984																dish1_02	WT	BL	222	1	2.97823
dish1_03	dbKO	BL	222	1	0.84851																dish1_03	dbKO	BL	222	1	0.921146
dish1_04	WT	BL	222	1	8.09698																dish1_04	WT	BL	222	1	2.84552
dish1_05	dbKO	BL	222	1	3.2148																dish1_05	dbKO	BL	222	1	1.79299
dish1_06	dbKO	BL	222	1	4.14276																dish1_06	dbKO	BL	222	1	2.03538
dish2_01	dbKO	BL	222	1	3.03549																dish2_01	dbKO	BL	222	1	1.74227
dish2_02	dbKO	BL	222	1	4.36504																dish2_02	dbKO	BL	222	1	2.08927
dish2_03	WT	BL	222	1	12.9942																dish2_03	WT	BL	222	1	3.60475
dish2_04	WT	BL	222	1	10.222																dish2_04	WT	BL	222	1	3.19718
dish2_05	WT	BL	222	1	10.3425																dish2_05	WT	BL	222	1	3.21597
dish2_06	dbKO	BL	222	1	7.08061																dish2_06	dbKO	BL	222	1	2.66094
dish3_01	dbKO	BL	222	1	7.69265																dish3_01	dbKO	BL	222	1	2.77356
dish3_02	WT	BL	222	1	6.70822																dish3_02	WT	BL	222	1	2.59002
dish3_03	dbKO	BL	222	1	0.956196																dish3_03	dbKO	BL	222	1	0.977853
dish3_04	WT	BL	222	1	3.63714																dish3_04	WT	BL	222	1	1.90713
dish3_05	dbKO	BL	222	1	2.1408																dish3_05	dbKO	BL	222	1	1.46315
dish3_06	WT	BL	222	1	6.82322																dish3_06	WT	BL	222	1	2.61213
dish4_01	dbKO	BL+reDA	222	1	5.46816																dish4_01	dbKO	BL+reDA	222	1	2.33841
dish4_02	WT	BL+reDA	222	1	6.64276																dish4_02	WT	BL+reDA	222	1	2.57736
dish4_03	dbKO	BL+reDA	222	1	0.519255																dish4_03	dbKO	BL+reDA	222	1	0.720593
dish4_04	WT	BL+reDA	222	1	11.4839																dish4_04	WT	BL+reDA	222	1	3.38878
dish4_05	WT	BL+reDA	222	1	8.59875																dish4_05	WT	BL+reDA	222	1	2.93236
dish4_06	dbKO	BL+reDA	222	1	2.18122																dish4_06	dbKO	BL+reDA	222	1	1.47689
dish5_01	dbKO	BL+reDA	222	1	2.62725																dish5_01	dbKO	BL+reDA	222	1	1.62088
dish5_02	dbKO	BL+reDA	222	1	1.25382																dish5_02	dbKO	BL+reDA	222	1	1.11974
dish5_03	WT	BL+reDA	222	1	6.36049																dish5_03	WT	BL+reDA	222	1	2.522
dish5_04	WT	BL+reDA	222	1	6.72222																dish5_04	WT	BL+reDA	222	1	2.59272
dish5_05	WT	BL+reDA	222	1	11.3514																dish5_05	WT	BL+reDA	222	1	3.36919
dish5_06	dbKO	BL+reDA	222	1	0.88398																dish5_06	dbKO	BL+reDA	222	1	0.940202
dish6_01	dbKO	BL+reDA	222	1	5.35259																dish6_01	dbKO	BL+reDA	222	1	2.31357
dish6_02	dbKO	BL+reDA	222	1	7.38041																dish6_02	dbKO	BL+reDA	222	1	2.71669
dish6_03	dbKO	BL+reDA	222	1	1.43153																dish6_03	dbKO	BL+reDA	222	1	1.19647
dish6_04	WT	BL+reDA	222	1	7.47245																dish6_04	WT	BL+reDA	222	1	2.73358
dish6_05	WT	BL+reDA	222	1	7.24071																dish6_05	WT	BL+reDA	222	1	2.69086
dish6_06	WT	BL+reDA	222	1	5.19667																dish6_06	WT	BL+reDA	222	1	2.27962
plate02_A1	dbKO	LA	222	1	7.00884																plate02_A1	dbKO	LA	222	1	2.64742
plate02_A2	WT	LA	222	1	11.0711																plate02_A2	WT	LA	222	1	3.32733
plate02_A3	WT	LA	222	1	9.71708																plate02_A3	WT	LA	222	1	3.11722
plate02_A4	dbKO	LA	222	1	6.85408																plate02_A4	dbKO	LA	222	1	2.61803
plate02_A5	dbKO	LA	222	1	3.37735																plate02_A5	dbKO	LA	222	1	1.83776
plate02_A6	WT	LA	222	1	9.40714																plate02_A6	WT	LA	222	1	3.06711
plate02_B1	dbKO	LA	222	1	11.0379																plate02_B1	dbKO	LA	222	1	3.32233
plate02_B2	WT	LA	222	1	8.3062																plate02_B2	WT	LA	222	1	2.88205
plate02_B3	dbKO	LA	222	1	2.43351																plate02_B3	dbKO	LA	222	1	1.55997
plate02_B4	WT	LA	222	1	9.23827																plate02_B4	WT	LA	222	1	3.03945
plate02_B5	dbKO	LA	222	1	9.55214																plate02_B5	dbKO	LA	222	1	3.09065
plate02_B6	WT	LA	222	1	8.57441																plate02_B6	WT	LA	222	1	2.92821
plate02_C1	WT	LA	222	1	8.04404																plate02_C1	WT	LA	222	1	2.8362
plate02_C2	dbKO	LA	222	1	1.97949																plate02_C2	dbKO	LA	222	1	1.40694
plate02_C3	dbKO	LA	222	1	5.40565																plate02_C3	dbKO	LA	222	1	2.325
plate02_C4	WT	LA	222	1	13.3263																plate02_C4	WT	LA	222	1	3.65053
plate02_C5	dbKO	LA	222	1	9.15449																plate02_C5	dbKO	LA	222	1	3.02564
plate02_C6	WT	LA	222	1	9.30229																plate02_C6	WT	LA	222	1	3.04997
plate02_D1	dbKO	LA	222	1	10.7																plate02_D1	dbKO	LA	222	1	3.27109
plate02_D2	WT	LA	222	1	14.271																plate02_D2	WT	LA	222	1	3.7777
dish01_01	dbKO	BL	223	1	5.63076																dish01_01	dbKO	BL	223	1	2.37292
dish01_02	dbKO	BL	223	1	2.93088																dish01_02	dbKO	BL	223	1	1.71198
dish01_03	WT	BL	223	1	5.47916																dish01_03	WT	BL	223	1	2.34076
dish01_04	dbKO	BL	223	1	1.6609																dish01_04	dbKO	BL	223	1	1.28876
dish01_05	WT	BL	223	1	1.28284																dish01_05	WT	BL	223	1	1.13263
dish01_06	WT	BL	223	1	8.82829																dish01_06	WT	BL	223	1	2.97124
dish02_01	dbKO	BL	223	1	4.91971																dish02_01	dbKO	BL	223	1	2.21804
dish02_02	WT	BL	223	1	5.99861																dish02_02	WT	BL	223	1	2.44921
dish02_03	WT	BL	223	1	9.42539																dish02_03	WT	BL	223	1	3.07008
dish02_04	WT	BL	223	1	6.3432																dish02_04	WT	BL	223	1	2.51857
dish02_05	dbKO	BL	223	1	2.98647																dish02_05	dbKO	BL	223	1	1.72814
dish02_06	dbKO	BL	223	1	0.252412																dish02_06	dbKO	BL	223	1	0.502406
dish03_01	dbKO	BL	223	1	5.05455																dish03_01	dbKO	BL	223	1	2.24823
dish03_02	WT	BL	223	1	4.77892																dish03_02	WT	BL	223	1	2.18607
dish03_03	WT	BL	223	1	8.51449																dish03_03	WT	BL	223	1	2.91796
dish03_05	WT	BL	223	1	13.6754																dish03_05	WT	BL	223	1	3.69803
dish03_06	dbKO	BL	223	1	0.238863																dish03_06	dbKO	BL	223	1	0.488736
dish04_01	WT	BL+reDA	223	1	2.97571																dish04_01	WT	BL+reDA	223	1	1.72502
dish04_03	WT	BL+reDA	223	1	2.15404																dish04_03	WT	BL+reDA	223	1	1.46766
dish04_04	dbKO	BL+reDA	223	1	0.943137																dish04_04	dbKO	BL+reDA	223	1	0.971153
dish04_05	dbKO	BL+reDA	223	1	1.54204																dish04_05	dbKO	BL+reDA	223	1	1.24179
dish04_06	dbKO	BL+reDA	223	1	9.38047																dish04_06	dbKO	BL+reDA	223	1	3.06276
dish05_01	dbKO	BL+reDA	223	1	0.937039																dish05_01	dbKO	BL+reDA	223	1	0.968008
dish05_03	dbKO	BL+reDA	223	1	3.02122																dish05_03	dbKO	BL+reDA	223	1	1.73816
dish05_04	WT	BL+reDA	223	1	9.67827																dish05_04	WT	BL+reDA	223	1	3.11099
dish05_05	WT	BL+reDA	223	1	4.04045																dish05_05	WT	BL+reDA	223	1	2.01009
dish05_06	dbKO	BL+reDA	223	1	2.57596																dish05_06	dbKO	BL+reDA	223	1	1.60498
dish06_02	dbKO	BL+reDA	223	1	0.594647																dish06_02	dbKO	BL+reDA	223	1	0.771134
dish06_03	WT	BL+reDA	223	1	10.7245																dish06_03	WT	BL+reDA	223	1	3.27483
dish06_04	WT	BL+reDA	223	1	11.5914																dish06_04	WT	BL+reDA	223	1	3.40462
dish06_05	dbKO	BL+reDA	223	1	9.06075																dish06_05	dbKO	BL+reDA	223	1	3.01011
dish06_06	dbKO	BL+reDA	223	1	1.22659																dish06_06	dbKO	BL+reDA	223	1	1.10751
plate02_A1	WT	LA	223	1	9.35484																plate02_A1	WT	LA	223	1	3.05857
plate02_A2	dbKO	LA	223	1	6.97376																plate02_A2	dbKO	LA	223	1	2.64079
plate02_A3	dbKO	LA	223	1	9.167																plate02_A3	dbKO	LA	223	1	3.02771
plate02_A4	WT	LA	223	1	10.5928																plate02_A4	WT	LA	223	1	3.25466
plate02_A6	dbKO	LA	223	1	7.52635																plate02_A6	dbKO	LA	223	1	2.74342
plate02_B1	WT	LA	223	1	8.77624																plate02_B1	WT	LA	223	1	2.96247
plate02_B2	WT	LA	223	1	10.3657																plate02_B2	WT	LA	223	1	3.21958
plate02_B3	dbKO	LA	223	1	7.9658																plate02_B3	dbKO	LA	223	1	2.82238
plate02_B4	WT	LA	223	1	5.06894																plate02_B4	WT	LA	223	1	2.25143
plate02_B5	dbKO	LA	223	1	3.12655																plate02_B5	dbKO	LA	223	1	1.76821
plate02_B6	WT	LA	223	1	1.49798																plate02_B6	WT	LA	223	1	1.22392
plate02_C1	dbKO	LA	223	1	3.06878																plate02_C1	dbKO	LA	223	1	1.75179
plate02_C2	WT	LA	223	1	12.6472																plate02_C2	WT	LA	223	1	3.55629
plate02_C3	dbKO	LA	223	1	1.7572																plate02_C3	dbKO	LA	223	1	1.32559
plate02_C4	WT	LA	223	1	12.3957																plate02_C4	WT	LA	223	1	3.52076
plate02_C5	dbKO	LA	223	1	1.7142																plate02_C5	dbKO	LA	223	1	1.30927
plate02_C6	dbKO	LA	223	1	0.506039																plate02_C6	dbKO	LA	223	1	0.711364
plate02_D1	WT	LA	223	1	9.15359																plate02_D1	WT	LA	223	1	3.02549
plate02_D2	dbKO	LA	223	1	1.95463																plate02_D2	dbKO	LA	223	1	1.39808
