# Supplementary material for: Disturbed retinoid metabolism upon loss of rlbp1a impairs cone function and leads to subretinal lipid deposits and photoreceptor degeneration in the zebrafish retina
Source: eLife. 2021 Oct 20;10:e71473. doi: 10.7554/eLife.71473 (PMC8585484; doi:10.7554/eLife.71473)
Supplement: Figure 5—source data 1. [file elife-71473-fig5-data1.xlsx]

## Sheet: Fig5G1
Fig.5G1: aKO 5dpf
genotype	fish	region	Length		genotype	region	variable	n	min	max	median	iqr	mean	sd	se	ci
*rlbp1a* +/+	2	d105	9.89		*rlbp1a* +/+	d175	Length	9	7.181	11.496	9.011	1.215	9.358	1.392	0.464	1.07
*rlbp1a* +/+	2	d140	10.648		*rlbp1a* +/+	d140	Length	9	5.8	10.648	8.172	1.667	7.974	1.501	0.5	1.154
*rlbp1a* +/+	2	d175	8.074		*rlbp1a* +/+	d105	Length	9	7.654	9.89	8.718	1.127	8.672	0.711	0.237	0.546
*rlbp1a* +/+	2	d35	10.381		*rlbp1a* +/+	d70	Length	9	7.362	10.27	7.978	1.545	8.567	1.07	0.357	0.822
*rlbp1a* +/+	2	d70	9.3635		*rlbp1a* +/+	d35	Length	9	8.748	12.591	10.184	0.593	10.206	1.055	0.352	0.811
*rlbp1a* +/+	2	v105	6.934		*rlbp1a* +/+	v35	Length	9	9.584	14.172	11.909	1.922	11.796	1.525	0.508	1.172
*rlbp1a* +/+	2	v35	14.1715		*rlbp1a* +/+	v70	Length	9	6.864	11.427	9.622	1.823	9.229	1.5	0.5	1.153
*rlbp1a* +/+	2	v70	10.5225		*rlbp1a* +/+	v105	Length	9	6.934	10.186	8.68	1.1	8.675	0.999	0.333	0.768
*rlbp1a* +/+	8	d105	8.363		*rlbp1a* -/-	d175	Length	9	7.513	12.466	9.06	1.251	9.394	1.519	0.506	1.168
*rlbp1a* +/+	8	d140	8.764		*rlbp1a* -/-	d140	Length	9	6.752	9.418	8.265	1.383	8.202	0.858	0.286	0.66
*rlbp1a* +/+	8	d175	8.6355		*rlbp1a* -/-	d105	Length	9	7.303	8.869	8.16	0.802	8.167	0.564	0.188	0.433
*rlbp1a* +/+	8	d35	10.1845		*rlbp1a* -/-	d70	Length	9	6.691	9.036	7.95	1	7.948	0.779	0.26	0.599
*rlbp1a* +/+	8	d70	9.6875		*rlbp1a* -/-	d35	Length	9	7.391	10.386	8.342	1.021	8.733	0.99	0.33	0.761
*rlbp1a* +/+	8	v105	9.247		*rlbp1a* -/-	v35	Length	9	10.021	13.08	12.088	1.52	11.84	0.965	0.322	0.742
*rlbp1a* +/+	8	v35	13.346		*rlbp1a* -/-	v70	Length	9	7.564	12.477	9.369	2.796	9.665	1.906	0.635	1.465
*rlbp1a* +/+	8	v70	11.4265		*rlbp1a* -/-	v105	Length	9	7.608	14.826	9.081	1.539	10.06	2.597	0.866	1.997
*rlbp1a* +/+	9	d105	7.654
*rlbp1a* +/+	9	d140	7.6605
*rlbp1a* +/+	9	d175	7.1815
*rlbp1a* +/+	9	d35	9.8105
*rlbp1a* +/+	9	d70	10.27
*rlbp1a* +/+	9	v105	10.1855
*rlbp1a* +/+	9	v35	12.717
*rlbp1a* +/+	9	v70	10.2785
*rlbp1a* +/+	10	d105	8.027
*rlbp1a* +/+	10	d140	8.172
*rlbp1a* +/+	10	d175	9.8505
*rlbp1a* +/+	10	d35	10.289
*rlbp1a* +/+	10	d70	7.8185
*rlbp1a* +/+	10	v105	9.292
*rlbp1a* +/+	10	v35	12.518
*rlbp1a* +/+	10	v70	8.7905
*rlbp1a* +/+	11	d105	8.9205
*rlbp1a* +/+	11	d140	9.09
*rlbp1a* +/+	11	d175	9.011
*rlbp1a* +/+	11	d35	12.591
*rlbp1a* +/+	11	d70	9.2215
*rlbp1a* +/+	11	v105	9.4595
*rlbp1a* +/+	11	v35	11.909
*rlbp1a* +/+	11	v70	9.622
*rlbp1a* +/+	12	d105	8.0625
*rlbp1a* +/+	12	d140	7.097
*rlbp1a* +/+	12	d175	8.9575
*rlbp1a* +/+	12	d35	9.788
*rlbp1a* +/+	12	d70	7.892
*rlbp1a* +/+	12	v105	8.192
*rlbp1a* +/+	12	v35	10.908
*rlbp1a* +/+	12	v70	8.456
*rlbp1a* +/+	16	d105	8.718
*rlbp1a* +/+	16	d140	6.175
*rlbp1a* +/+	16	d175	11.165
*rlbp1a* +/+	16	d35	10.6025
*rlbp1a* +/+	16	d70	7.978
*rlbp1a* +/+	16	v105	8.6795
*rlbp1a* +/+	16	v35	10.2165
*rlbp1a* +/+	16	v70	9.764
*rlbp1a* +/+	17	d105	9.2245
*rlbp1a* +/+	17	d140	5.8005
*rlbp1a* +/+	17	d175	9.8505
*rlbp1a* +/+	17	d35	8.748
*rlbp1a* +/+	17	d70	7.5065
*rlbp1a* +/+	17	v105	7.648
*rlbp1a* +/+	17	v35	9.584
*rlbp1a* +/+	17	v70	6.8645
*rlbp1a* +/+	18	d105	9.189
*rlbp1a* +/+	18	d140	8.3555
*rlbp1a* +/+	18	d175	11.4955
*rlbp1a* +/+	18	d35	9.4595
*rlbp1a* +/+	18	d70	7.362
*rlbp1a* +/+	18	v105	8.4395
*rlbp1a* +/+	18	v35	10.7945
*rlbp1a* +/+	18	v70	7.3385
*rlbp1a* -/-	1	d105	7.303
*rlbp1a* -/-	1	d140	7.547
*rlbp1a* -/-	1	d175	7.5125
*rlbp1a* -/-	1	d35	7.391
*rlbp1a* -/-	1	d70	7.467
*rlbp1a* -/-	1	v105	8.255
*rlbp1a* -/-	1	v35	12.0875
*rlbp1a* -/-	1	v70	7.564
*rlbp1a* -/-	3	d105	8.869
*rlbp1a* -/-	3	d140	8.93
*rlbp1a* -/-	3	d175	12.466
*rlbp1a* -/-	3	d35	8.3415
*rlbp1a* -/-	3	d70	9.036
*rlbp1a* -/-	3	v105	14.0535
*rlbp1a* -/-	3	v35	13.08
*rlbp1a* -/-	3	v70	12.4775
*rlbp1a* -/-	4	d105	8.689
*rlbp1a* -/-	4	d140	7.91
*rlbp1a* -/-	4	d175	10.27
*rlbp1a* -/-	4	d35	8.2915
*rlbp1a* -/-	4	d70	7.274
*rlbp1a* -/-	4	v105	8.577
*rlbp1a* -/-	4	v35	10.0215
*rlbp1a* -/-	4	v70	7.89
*rlbp1a* -/-	5	d105	8.1035
*rlbp1a* -/-	5	d140	6.7525
*rlbp1a* -/-	5	d175	8.868
*rlbp1a* -/-	5	d35	9.256
*rlbp1a* -/-	5	d70	8.4675
*rlbp1a* -/-	5	v105	9.921
*rlbp1a* -/-	5	v35	12.565
*rlbp1a* -/-	5	v70	9.3695
*rlbp1a* -/-	6	d105	7.8875
*rlbp1a* -/-	6	d140	9.418
*rlbp1a* -/-	6	d175	10.0235
*rlbp1a* -/-	6	d35	10.1285
*rlbp1a* -/-	6	d70	8.834
*rlbp1a* -/-	6	v105	9.841
*rlbp1a* -/-	6	v35	11.0455
*rlbp1a* -/-	6	v70	10.1105
*rlbp1a* -/-	7	d105	7.419
*rlbp1a* -/-	7	d140	9.088
*rlbp1a* -/-	7	d175	9.0595
*rlbp1a* -/-	7	d35	8.2345
*rlbp1a* -/-	7	d70	7.4875
*rlbp1a* -/-	7	v105	14.826
*rlbp1a* -/-	7	v35	11.024
*rlbp1a* -/-	7	v70	12.4405
*rlbp1a* -/-	13	d105	8.778
*rlbp1a* -/-	13	d140	8.2655
*rlbp1a* -/-	13	d175	7.6015
*rlbp1a* -/-	13	d35	8.4965
*rlbp1a* -/-	13	d70	7.9495
*rlbp1a* -/-	13	v105	9.0805
*rlbp1a* -/-	13	v35	12.627
*rlbp1a* -/-	13	v70	7.7875
*rlbp1a* -/-	14	d105	8.1605
*rlbp1a* -/-	14	d140	7.529
*rlbp1a* -/-	14	d175	9.9695
*rlbp1a* -/-	14	d35	8.07
*rlbp1a* -/-	14	d70	6.6915
*rlbp1a* -/-	14	v105	7.608
*rlbp1a* -/-	14	v35	11.9605
*rlbp1a* -/-	14	v70	10.686
*rlbp1a* -/-	15	d105	8.292
*rlbp1a* -/-	15	d140	8.3755
*rlbp1a* -/-	15	d175	8.7725
*rlbp1a* -/-	15	d35	10.3865
*rlbp1a* -/-	15	d70	8.3275
*rlbp1a* -/-	15	v105	8.382
*rlbp1a* -/-	15	v35	12.1475
*rlbp1a* -/-	15	v70	8.656
*rlbp1a* +/+	2	ON	0
*rlbp1a* +/+	8	ON	0
*rlbp1a* +/+	9	ON	0
*rlbp1a* +/+	10	ON	0
*rlbp1a* +/+	11	ON	0
*rlbp1a* +/+	12	ON	0
*rlbp1a* +/+	16	ON	0
*rlbp1a* +/+	17	ON	0
*rlbp1a* +/+	18	ON	0
*rlbp1a* -/-	1	ON	0
*rlbp1a* -/-	3	ON	0
*rlbp1a* -/-	4	ON	0
*rlbp1a* -/-	5	ON	0
*rlbp1a* -/-	6	ON	0
*rlbp1a* -/-	7	ON	0
*rlbp1a* -/-	13	ON	0
*rlbp1a* -/-	14	ON	0
*rlbp1a* -/-	15	ON	0

## Sheet: Fig5G2
Fig.5G2: aKO 34 dpf
genotype	fish	region	Length		genotype	region	variable	n	min	max	median	iqr	mean	sd	se	ci
*rlbp1a* +/+	4	d100	27.4665		*rlbp1a* +/+	d500	Length	3	27.59	30.189	29.627	1.3	29.136	1.368	0.79	3.398
*rlbp1a* +/+	4	d200	31.315		*rlbp1a* +/+	d400	Length	3	27.848	32.641	30.398	2.396	30.296	2.398	1.384	5.957
*rlbp1a* +/+	4	d300	31.009		*rlbp1a* +/+	d300	Length	3	31.009	32.492	31.706	0.741	31.735	0.742	0.428	1.842
*rlbp1a* +/+	4	d400	30.398		*rlbp1a* +/+	d200	Length	3	28.064	31.315	30.036	1.625	29.805	1.638	0.946	4.068
*rlbp1a* +/+	4	d500	30.1895		*rlbp1a* +/+	d100	Length	3	27.466	33.614	27.519	3.073	29.533	3.534	2.04	8.779
*rlbp1a* +/+	4	v100	28.313		*rlbp1a* +/+	v100	Length	3	28.313	30.886	29.811	1.287	29.67	1.293	0.746	3.211
*rlbp1a* +/+	4	v200	25.0565		*rlbp1a* +/+	v200	Length	3	23.012	26.26	25.056	1.624	24.776	1.642	0.948	4.079
*rlbp1a* +/+	4	v300	21.644		*rlbp1a* +/+	v300	Length	3	19.27	21.644	20.248	1.187	20.387	1.193	0.689	2.964
*rlbp1a* +/+	5	d100	33.6135		*rlbp1a* -/-	d500	Length	3	20.482	20.992	20.842	0.256	20.772	0.263	0.152	0.652
*rlbp1a* +/+	5	d200	30.036		*rlbp1a* -/-	d400	Length	3	19.07	23.587	22.988	2.259	21.882	2.453	1.417	6.095
*rlbp1a* +/+	5	d300	32.4915		*rlbp1a* -/-	d300	Length	3	23.794	25.929	25.141	1.067	24.955	1.08	0.623	2.682
*rlbp1a* +/+	5	d400	32.6405		*rlbp1a* -/-	d200	Length	3	20.717	21.807	21.061	0.545	21.195	0.557	0.322	1.384
*rlbp1a* +/+	5	d500	29.6275		*rlbp1a* -/-	d100	Length	3	20.734	25.231	22.064	2.248	22.676	2.31	1.334	5.739
*rlbp1a* +/+	5	v100	29.811		*rlbp1a* -/-	v100	Length	3	17.755	25.168	20.983	3.706	21.302	3.717	2.146	9.233
*rlbp1a* +/+	5	v200	23.012		*rlbp1a* -/-	v200	Length	3	17.547	19.376	17.815	0.915	18.246	0.988	0.571	2.455
*rlbp1a* +/+	5	v300	19.2695		*rlbp1a* -/-	v300	Length	3	15.503	17.033	16.399	0.765	16.312	0.769	0.444	1.91
*rlbp1a* +/+	6	d100	27.519
*rlbp1a* +/+	6	d200	28.064
*rlbp1a* +/+	6	d300	31.7055
*rlbp1a* +/+	6	d400	27.848
*rlbp1a* +/+	6	d500	27.59
*rlbp1a* +/+	6	v100	30.8865
*rlbp1a* +/+	6	v200	26.26
*rlbp1a* +/+	6	v300	20.2485
*rlbp1a* -/-	1	d100	25.231
*rlbp1a* -/-	1	d200	21.807
*rlbp1a* -/-	1	d300	25.929
*rlbp1a* -/-	1	d400	19.07
*rlbp1a* -/-	1	d500	20.842
*rlbp1a* -/-	1	v100	25.168
*rlbp1a* -/-	1	v200	17.815
*rlbp1a* -/-	1	v300	17.033
*rlbp1a* -/-	2	d100	22.064
*rlbp1a* -/-	2	d200	21.0605
*rlbp1a* -/-	2	d300	25.141
*rlbp1a* -/-	2	d400	22.988
*rlbp1a* -/-	2	d500	20.9925
*rlbp1a* -/-	2	v100	20.9825
*rlbp1a* -/-	2	v200	19.3765
*rlbp1a* -/-	2	v300	16.399
*rlbp1a* -/-	3	d100	20.734
*rlbp1a* -/-	3	d200	20.717
*rlbp1a* -/-	3	d300	23.794
*rlbp1a* -/-	3	d400	23.5875
*rlbp1a* -/-	3	d500	20.4815
*rlbp1a* -/-	3	v100	17.755
*rlbp1a* -/-	3	v200	17.5465
*rlbp1a* -/-	3	v300	15.5025
*rlbp1a* +/+	4	ON	0
*rlbp1a* +/+	5	ON	0
*rlbp1a* +/+	6	ON	0
*rlbp1a* -/-	1	ON	0
*rlbp1a* -/-	2	ON	0
*rlbp1a* -/-	3	ON	0

## Sheet: Fig5G3
Fig.5G3: aKO adult
genotype	fish	region	Length		genotype	region	variable	n	min	max	median	iqr	mean	sd	se	ci
*rlbp1a* +/+	2	d1000	31.872		*rlbp1a* +/+	d1000	Length	3	21.12	31.872	24.843	5.376	25.945	5.46	3.152	13.564
*rlbp1a* +/+	2	d200	27.886		*rlbp1a* +/+	d800	Length	3	26.309	27.871	27.828	0.781	27.336	0.89	0.514	2.21
*rlbp1a* +/+	2	d400	30.783		*rlbp1a* +/+	d600	Length	3	27.696	33.26	29.045	2.782	30	2.902	1.676	7.21
*rlbp1a* +/+	2	d600	33.26		*rlbp1a* +/+	d400	Length	3	27.44	30.783	28.202	1.671	28.808	1.752	1.012	4.352
*rlbp1a* +/+	2	d800	27.828		*rlbp1a* +/+	d200	Length	3	27.886	38.272	30.234	5.193	32.131	5.447	3.145	13.53
*rlbp1a* +/+	2	v200	22.135		*rlbp1a* +/+	v200	Length	3	22.135	28.391	27.35	3.128	25.959	3.352	1.935	8.327
*rlbp1a* +/+	2	v400	18.312		*rlbp1a* +/+	v400	Length	3	15.46	22.213	18.312	3.377	18.662	3.39	1.957	8.421
*rlbp1a* +/+	2	v600	17.153		*rlbp1a* +/+	v600	Length	3	13.026	17.153	15.691	2.064	15.29	2.093	1.208	5.198
*rlbp1a* +/+	4	d1000	21.12		*rlbp1a* -/-	d1000	Length	3	12.183	19.183	18.233	3.5	16.533	3.797	2.192	9.432
*rlbp1a* +/+	4	d200	38.272		*rlbp1a* -/-	d800	Length	3	18.618	24.117	18.834	2.75	20.523	3.114	1.798	7.737
*rlbp1a* +/+	4	d400	28.202		*rlbp1a* -/-	d600	Length	3	22.627	23.37	22.903	0.371	22.967	0.376	0.217	0.933
*rlbp1a* +/+	4	d600	29.045		*rlbp1a* -/-	d400	Length	3	16.128	28.397	21.26	6.134	21.928	6.162	3.557	15.307
*rlbp1a* +/+	4	d800	26.309		*rlbp1a* -/-	d200	Length	3	18.837	23.792	22.267	2.477	21.632	2.538	1.465	6.304
*rlbp1a* +/+	4	v200	28.391		*rlbp1a* -/-	v200	Length	3	9.769	24.883	19.759	7.557	18.137	7.686	4.438	19.094
*rlbp1a* +/+	4	v400	22.213		*rlbp1a* -/-	v400	Length	3	11.451	18.346	14.596	3.447	14.798	3.452	1.993	8.575
*rlbp1a* +/+	4	v600	15.691		*rlbp1a* -/-	v600	Length	3	8.551	11.785	9.678	1.617	10.005	1.642	0.948	4.078
*rlbp1a* +/+	6	d1000	24.843
*rlbp1a* +/+	6	d200	30.234
*rlbp1a* +/+	6	d400	27.44
*rlbp1a* +/+	6	d600	27.696
*rlbp1a* +/+	6	d800	27.871
*rlbp1a* +/+	6	v200	27.35
*rlbp1a* +/+	6	v400	15.46
*rlbp1a* +/+	6	v600	13.026
*rlbp1a* -/-	1	d1000	19.183
*rlbp1a* -/-	1	d200	18.837
*rlbp1a* -/-	1	d400	28.397
*rlbp1a* -/-	1	d600	22.627
*rlbp1a* -/-	1	d800	18.834
*rlbp1a* -/-	1	v200	24.883
*rlbp1a* -/-	1	v400	14.596
*rlbp1a* -/-	1	v600	11.785
*rlbp1a* -/-	3	d1000	12.183
*rlbp1a* -/-	3	d200	22.267
*rlbp1a* -/-	3	d400	16.128
*rlbp1a* -/-	3	d600	22.903
*rlbp1a* -/-	3	d800	18.618
*rlbp1a* -/-	3	v200	9.769
*rlbp1a* -/-	3	v400	11.451
*rlbp1a* -/-	3	v600	8.551
*rlbp1a* -/-	5	d1000	18.233
*rlbp1a* -/-	5	d200	23.792
*rlbp1a* -/-	5	d400	21.26
*rlbp1a* -/-	5	d600	23.37
*rlbp1a* -/-	5	d800	24.117
*rlbp1a* -/-	5	v200	19.759
*rlbp1a* -/-	5	v400	18.346
*rlbp1a* -/-	5	v600	9.678
*rlbp1a* +/+	2	ON	0
*rlbp1a* +/+	4	ON	0
*rlbp1a* +/+	6	ON	0
*rlbp1a* -/-	1	ON	0
*rlbp1a* -/-	3	ON	0
*rlbp1a* -/-	5	ON	0

## Sheet: Fig5H1
Fig.5H1: aKO 5 dpf
genotype	fish	number		genotype	variable	n	min	max	median	iqr	mean	sd	se	ci
rlbp1a +/+	6	3		rlbp1a +/+	number	8	3	19	8.75	7.125	8.75	5.458	1.93	4.563
rlbp1a +/+	7	19		rlbp1a -/-	number	8	14	49	26.25	9.375	28	10.461	3.698	8.745
rlbp1a +/+	8	7.5
rlbp1a +/+	9	3.5
rlbp1a +/+	10	4
rlbp1a +/+	14	10.5
rlbp1a +/+	15	12.5
rlbp1a +/+	16	10
rlbp1a -/-	1	32.5
rlbp1a -/-	2	14
rlbp1a -/-	3	28.5
rlbp1a -/-	4	24
rlbp1a -/-	5	20.5
rlbp1a -/-	11	49
rlbp1a -/-	12	23.5
rlbp1a -/-	13	32

## Sheet: FigH2
Fig.H2: aKO 34 dpf
genotype	fish	number		genotype	variable	n	min	max	median	iqr	mean	sd	se	ci
*rlbp1a* +/+	5	32.5		*rlbp1a* +/+	number	3	26	38.5	32.5	6.25	32.333	6.252	3.609	15.53
*rlbp1a* +/+	6	26		*rlbp1a* -/-	number	4	249	267	256.5	6.75	257.25	7.5	3.75	11.934
*rlbp1a* +/+	7	38.5
*rlbp1a* -/-	1	267
*rlbp1a* -/-	2	249
*rlbp1a* -/-	3	255
*rlbp1a* -/-	4	258

## Sheet: FigH3
Fig.H3: aKO adult
genotype	name	number		genotype	variable	n	min	max	median	iqr	mean	sd	se	ci
*rlbp1a* +/+	blind_0005	12		*rlbp1a* +/+	number	3	6	43	12	18.5	20.333	19.858	11.465	49.33
*rlbp1a* +/+	blind_0006	43		*rlbp1a* -/-	number	3	123	293	232	85	216	86.122	49.723	213.939
*rlbp1a* +/+	blind_0007	6
*rlbp1a* -/-	blind_0001	123
*rlbp1a* -/-	blind_0003	232
*rlbp1a* -/-	blind_0004	293
