# Supplementary material for: Disturbed retinoid metabolism upon loss of rlbp1a impairs cone function and leads to subretinal lipid deposits and photoreceptor degeneration in the zebrafish retina
Source: eLife. 2021 Oct 20;10:e71473. doi: 10.7554/eLife.71473 (PMC8585484; doi:10.7554/eLife.71473)
Supplement: Figure 6—source data 1. [file elife-71473-fig6-data1.xlsx]

## Sheet: Sheet1
NE = normalized expression
Fig.8A: aKO 5dpf
Genotype	Target	Sample	Mean.Cq	avg_WTCq	dCt	RQ	gmRef	NE	log2NE		Genotype	Target	variable	n	min	max	median	iqr	mean	sd	se	ci
2	rho	aKO1	21.226	20.7768	-0.449232	0.732432	1.93881	0.377774	-1.40441		1	rho	log2NE	3	-0.274	0.301	-0.028	0.287	0	0.288	0.167	0.716
2	rho	aKO2	21.8506	20.7768	-1.07384	0.475053	0.637419	0.745276	-0.424154		2	rho	log2NE	3	-1.404	-0.424	-1.208	0.49	-1.012	0.519	0.299	1.288
2	rho	aKO3	21.563	20.7768	-0.786231	0.579857	1.33948	0.432898	-1.2079
1	rho	WT1	19.8641	20.7768	0.912699	1.88256	2.27575	0.827228	-0.273643
1	rho	WT2	22.0208	20.7768	-1.24402	0.422195	0.342644	1.23217	0.301198
1	rho	WT3	20.4455	20.7768	0.33132	1.25816	1.28243	0.981082	-0.027555
2	bactin	aKO1	20.4584	21.5072	1.04882	2.06883
2	bactin	aKO2	22.1532	21.5072	-0.645953	0.639071
2	bactin	aKO3	21.2278	21.5072	0.279444	1.21373
1	bactin	WT1	20.3187	21.5072	1.18851	2.27918
1	bactin	WT2	22.952	21.5072	-1.44478	0.367349
1	bactin	WT3	21.251	21.5072	0.256264	1.19438
2	rpl13a	aKO1	21.6869	22.5484	0.861529	1.81696
2	rpl13a	aKO2	23.2018	22.5484	-0.65342	0.635771
2	rpl13a	aKO3	21.9845	22.5484	0.563897	1.47826
1	rpl13a	WT1	21.3642	22.5484	1.18417	2.27233
1	rpl13a	WT2	24.194	22.5484	-1.64566	0.319601
1	rpl13a	WT3	22.0869	22.5484	0.461486	1.37696
Fig.8B: aKO Adult
Genotype	Target	Sample	Mean.Cq	avg_WTCq	dCt	RQ	gmRef	NE	transNE		Genotype	Target	variable	n	min	max	median	iqr	mean	sd	se	ci
2	rho	aKO1	22.2526	18.3639	-3.88868	0.0675135	0.545575	0.123748	-3.01453		1	rho	log2NE	3	-0.525	0.787	-0.262	0.656	0	0.694	0.401	1.724
2	rho	aKO2	24.7664	18.3639	-6.40252	0.0118208	0.258186	0.0457842	-4.44901		2	rho	log2NE	3	-4.449	-3.015	-3.664	0.717	-3.709	0.718	0.415	1.784
2	rho	aKO3	23.3371	18.3639	-4.97322	0.0318354	0.403521	0.0788941	-3.66394
1	rho	WT1	18.2477	18.3639	0.116173	1.08386	1.29977	0.83388	-0.262088
1	rho	WT2	18.8696	18.3639	-0.505705	0.704316	1.01319	0.69515	-0.524603
1	rho	WT3	17.9744	18.3639	0.389532	1.30997	0.759352	1.72511	0.786691
2	bactin	aKO1	22.9728	22.1646	-0.808274	0.571065
2	bactin	aKO2	23.9896	22.1646	-1.82509	0.282224
2	bactin	aKO3	23.5682	22.1646	-1.40365	0.377973
1	bactin	WT1	21.7919	22.1646	0.372687	1.29476
1	bactin	WT2	22.0159	22.1646	0.148619	1.10851
1	bactin	WT3	22.6859	22.1646	-0.521305	0.696741
2	rpl13a	aKO1	24.7803	23.8402	-0.94003	0.521222
2	rpl13a	aKO2	25.9222	23.8402	-2.08194	0.236196
2	rpl13a	aKO3	25.0551	23.8402	-1.21492	0.430796
1	rpl13a	WT1	23.4564	23.8402	0.383834	1.3048
1	rpl13a	WT2	23.951	23.8402	-0.110823	0.92606
1	rpl13a	WT3	24.1132	23.8402	-0.273011	0.82759
Fig.8C: dbKO 5dpf
Genotype	Target	Sample	Mean.Cq	avg_WTCq	dCt	RQ	gmRef	NE	transNE		Genotype	Target	variable	n	min	max	median	iqr	mean	sd	se	ci
2	rho	dbKO1	22.2414	20.217	-2.02441	0.245806	0.463207	0.53066	-0.91414		1	rho	log2NE	3	-0.178	0.164	0.015	0.171	0	0.171	0.099	0.426
2	rho	dbKO2	21.8667	20.217	-1.64967	0.318712	0.935834	0.340565	-1.554		2	rho	log2NE	3	-1.554	-0.914	-1.011	0.32	-1.16	0.345	0.199	0.857
2	rho	dbKO3	21.2311	20.217	-1.01409	0.495139	0.997959	0.496152	-1.01115
1	rho	WT1	20.0324	20.217	0.184563	1.13647	1.01455	1.12017	0.163722
1	rho	WT2	20.46	20.217	-0.243033	0.844967	0.956139	0.883729	-0.178325
1	rho	WT3	20.1585	20.217	0.05847	1.04136	1.03087	1.01017	0.014603
2	bactin	dbKO1	22.0506	21.317	-0.733596	0.601403
2	bactin	dbKO2	21.382	21.317	-0.0649898	0.955952
2	bactin	dbKO3	21.3004	21.317	0.0165712	1.01155
1	bactin	WT1	21.2212	21.317	0.0957925	1.06865
1	bactin	WT2	21.4706	21.317	-0.153635	0.898982
1	bactin	WT3	21.2591	21.317	0.0578428	1.04091
2	rpl13a	dbKO1	23.6463	22.1594	-1.48694	0.356768
2	rpl13a	dbKO2	22.2858	22.1594	-0.126361	0.91614
2	rpl13a	dbKO3	22.1819	22.1594	-0.0224671	0.984548
1	rpl13a	WT1	22.2135	22.1594	-0.0541096	0.963189
1	rpl13a	WT2	22.1352	22.1594	0.0242184	1.01693
1	rpl13a	WT3	22.1295	22.1594	0.0298912	1.02094
Fig.8D: dbKO Adult
Genotype	Target	Sample	Mean.Cq	avg_WTCq	dCt	RQ	gmRef	NE	transNE		Genotype	Target	variable	n	min	max	median	iqr	mean	sd	se	ci
2	rho	dbKO1	25.2899	23.1823	-2.10756	0.232039	0.792839	0.292668	-1.77266		1	rho	log2NE	3	-0.25	0.261	-0.011	0.256	0	0.256	0.148	0.636
2	rho	dbKO2	25.4469	23.1823	-2.26458	0.20811	0.959506	0.216893	-2.20494		2	rho	log2NE	3	-2.205	-1.773	-1.782	0.216	-1.92	0.247	0.143	0.614
2	rho	dbKO3	25.5307	23.1823	-2.34842	0.196361	0.675108	0.290858	-1.78161
1	rho	WT1	23.5895	23.1823	-0.407187	0.754092	0.629097	1.19869	0.261458
1	rho	WT2	22.9073	23.1823	0.275032	1.21002	1.21946	0.992261	-0.0112086
1	rho	WT3	23.0502	23.1823	0.132155	1.09593	1.30351	0.840751	-0.25025
2	bactin	dbKO1	22.7298	22.5581	-0.171737	0.887773
2	bactin	dbKO2	22.8676	22.5581	-0.309542	0.806898
2	bactin	dbKO3	23.2713	22.5581	-0.713173	0.609977
1	bactin	WT1	23.2603	22.5581	-0.702179	0.614643
1	bactin	WT2	22.2225	22.5581	0.335572	1.26188
1	bactin	WT3	22.1915	22.5581	0.366607	1.28932
2	rpl13a	dbKO1	25.0579	24.5598	-0.498064	0.708056
2	rpl13a	dbKO2	24.3695	24.5598	0.19027	1.14098
2	rpl13a	dbKO3	24.9803	24.5598	-0.420447	0.747193
1	rpl13a	WT1	25.1949	24.5598	-0.635111	0.643891
1	rpl13a	WT2	24.3229	24.5598	0.236909	1.17847
1	rpl13a	WT3	24.1616	24.5598	0.398202	1.31786
