# Supplementary material for: Disturbed retinoid metabolism upon loss of rlbp1a impairs cone function and leads to subretinal lipid deposits and photoreceptor degeneration in the zebrafish retina
Source: eLife. 2021 Oct 20;10:e71473. doi: 10.7554/eLife.71473 (PMC8585484; doi:10.7554/eLife.71473)
Supplement: Figure 7—source data 1. [file elife-71473-fig7-data1.xlsx]

## Sheet: Fig6G1
Fig.6G1: dbKO 5 dpf
genotype	fish	region	Length		genotype	region	variable	n	min	max	median	iqr	mean	sd	se	ci
WT	6	d105	9.108		WT	d175	Length	5	7.462	8.81	7.578	0.123	7.822	0.558	0.25	0.693
WT	6	d140	9.9125		WT	d140	Length	5	7.798	10.471	8.384	1.53	8.989	1.14	0.51	1.416
WT	6	d175	8.81		WT	d105	Length	5	7.75	9.591	9.108	0.35	8.966	0.716	0.32	0.889
WT	6	d35	9.627		WT	d70	Length	5	6.506	8.053	7.943	0.266	7.652	0.651	0.291	0.809
WT	6	d70	8.0125		WT	d35	Length	5	9.41	10.498	9.533	0.155	9.708	0.449	0.201	0.557
WT	6	v105	6.6945		WT	v35	Length	5	10.255	12.434	10.797	0.857	11.109	0.86	0.385	1.068
WT	6	v35	10.255		WT	v70	Length	5	6.149	11.831	8.472	1.572	8.591	2.118	0.947	2.629
WT	6	v70	6.1495		WT	v105	Length	5	6.694	8.706	7.974	1.019	7.723	0.81	0.362	1.006
WT	7	d105	9.591		dbKO	d175	Length	4	7.2	10.914	10.43	0.934	9.744	1.711	0.855	2.722
WT	7	d140	8.3825		dbKO	d140	Length	4	7.196	9.439	8.941	1.102	8.63	1.027	0.514	1.635
WT	7	d175	7.4615		dbKO	d105	Length	4	7.024	10.195	9.712	0.92	9.161	1.444	0.722	2.298
WT	7	d35	9.5325		dbKO	d70	Length	4	6.819	8.16	7.123	0.647	7.306	0.611	0.306	0.972
WT	7	d70	8.053		dbKO	d35	Length	4	9.352	10.19	9.506	0.28	9.638	0.377	0.188	0.6
WT	7	v105	7.9745		dbKO	v35	Length	4	11.364	12.715	12.036	0.583	12.038	0.568	0.284	0.903
WT	7	v35	10.797		dbKO	v70	Length	4	8.718	13.562	9.77	1.927	10.455	2.165	1.083	3.445
WT	7	v70	9.0385		dbKO	v105	Length	4	6.75	10.883	9.233	1.338	9.024	1.712	0.856	2.725
WT	8	d105	7.75
WT	8	d140	10.4705
WT	8	d175	7.6905
WT	8	d35	10.498
WT	8	d70	6.506
WT	8	v105	8.1305
WT	8	v35	12.434
WT	8	v70	11.8305
WT	9	d105	9.0165
WT	9	d140	8.3835
WT	9	d175	7.578
WT	9	d35	9.4105
WT	9	d70	7.7465
WT	9	v105	7.1115
WT	9	v35	10.601
WT	9	v70	8.472
WT	10	d105	9.3665
WT	10	d140	7.798
WT	10	d175	7.568
WT	10	d35	9.4715
WT	10	d70	7.943
WT	10	v105	8.7055
WT	10	v35	11.4575
WT	10	v70	7.466
dbKO	2	d105	7.024
dbKO	2	d140	9.4395
dbKO	2	d175	7.2005
dbKO	2	d35	9.352
dbKO	2	d70	6.819
dbKO	2	v105	9.4355
dbKO	2	v35	11.364
dbKO	2	v70	8.718
dbKO	3	d105	10.1955
dbKO	3	d140	7.196
dbKO	3	d175	10.426
dbKO	3	d35	10.19
dbKO	3	d70	7.3305
dbKO	3	v105	9.0295
dbKO	3	v35	12.715
dbKO	3	v70	10.2475
dbKO	4	d105	9.7965
dbKO	4	d140	9.302
dbKO	4	d175	10.434
dbKO	4	d35	9.5525
dbKO	4	d70	6.9145
dbKO	4	v105	10.883
dbKO	4	v35	12.1995
dbKO	4	v70	13.562
dbKO	5	d105	9.6275
dbKO	5	d140	8.5805
dbKO	5	d175	10.914
dbKO	5	d35	9.459
dbKO	5	d70	8.16
dbKO	5	v105	6.75
dbKO	5	v35	11.872
dbKO	5	v70	9.2925
WT	6	ON	0
WT	7	ON	0
WT	8	ON	0
WT	9	ON	0
WT	10	ON	0
dbKO	2	ON	0
dbKO	3	ON	0
dbKO	4	ON	0
dbKO	5	ON	0

## Sheet: Fig6G2
Fig.6G2: dbKO 34 dpf
genotype	fish	region	Length		genotype	region	variable	n	min	max	median	iqr	mean	sd	se	ci
WT	4	d100	25.385		WT	d500	Length	3	19.634	24.428	23.919	2.397	22.66	2.633	1.52	6.541
WT	4	d200	25.812		WT	d400	Length	3	22.089	34.202	25.353	6.056	27.215	6.267	3.618	15.569
WT	4	d300	24.416		WT	d300	Length	3	22.578	25.556	24.416	1.489	24.183	1.503	0.868	3.733
WT	4	d400	34.202		WT	d200	Length	3	25.812	27.908	25.848	1.048	26.523	1.2	0.693	2.981
WT	4	d500	23.919		WT	d100	Length	3	25.236	26.064	25.385	0.414	25.562	0.442	0.255	1.097
WT	4	v100	26.449		WT	v100	Length	3	18.774	26.449	23.158	3.837	22.794	3.85	2.223	9.564
WT	4	v200	18.748		WT	v200	Length	3	18.232	20.099	18.748	0.934	19.026	0.964	0.557	2.396
WT	4	v300	17.43		WT	v300	Length	3	14.384	17.43	15.739	1.523	15.851	1.526	0.881	3.79
WT	5	d100	26.064		dbKO	d500	Length	3	18.443	24.375	20.152	2.966	20.99	3.053	1.763	7.585
WT	5	d200	25.848		dbKO	d400	Length	3	17.954	24.285	19.273	3.165	20.504	3.34	1.928	8.298
WT	5	d300	22.5775		dbKO	d300	Length	3	19.074	25.268	19.953	3.097	21.432	3.352	1.935	8.326
WT	5	d400	22.089		dbKO	d200	Length	3	17.335	22.256	22.192	2.46	20.594	2.823	1.63	7.012
WT	5	d500	19.6345		dbKO	d100	Length	3	18.322	25.167	19.991	3.423	21.16	3.569	2.061	8.867
WT	5	v100	18.7745		dbKO	v100	Length	3	16.772	21.91	17.868	2.569	18.85	2.706	1.562	6.722
WT	5	v200	18.232		dbKO	v200	Length	3	16.285	17.987	17.482	0.851	17.251	0.874	0.505	2.172
WT	5	v300	15.739		dbKO	v300	Length	3	11.023	16.45	14.843	2.714	14.105	2.788	1.61	6.926
WT	6	d100	25.2355
WT	6	d200	27.908
WT	6	d300	25.5555
WT	6	d400	25.353
WT	6	d500	24.428
WT	6	v100	23.1585
WT	6	v200	20.0995
WT	6	v300	14.3845
dbKO	1	d100	19.9905
dbKO	1	d200	17.335
dbKO	1	d300	19.953
dbKO	1	d400	17.954
dbKO	1	d500	20.152
dbKO	1	v100	16.772
dbKO	1	v200	16.2845
dbKO	1	v300	14.843
dbKO	2	d100	18.3215
dbKO	2	d200	22.256
dbKO	2	d300	19.074
dbKO	2	d400	19.273
dbKO	2	d500	18.443
dbKO	2	v100	17.868
dbKO	2	v200	17.987
dbKO	2	v300	11.0225
dbKO	3	d100	25.167
dbKO	3	d200	22.192
dbKO	3	d300	25.2685
dbKO	3	d400	24.285
dbKO	3	d500	24.375
dbKO	3	v100	21.9095
dbKO	3	v200	17.4815
dbKO	3	v300	16.45
WT	4	ON	0
WT	5	ON	0
WT	6	ON	0
dbKO	1	ON	0
dbKO	2	ON	0
dbKO	3	ON	0

## Sheet: Fig6G3
Fig.6G3: dbKO adult
genotype	fish	region	Length		genotype	region	variable	n	min	max	median	iqr	mean	sd	se	ci
WT	3	d1000	27.929		WT	d1000	Length	4	24.478	30.713	28.622	2.598	28.109	2.674	1.337	4.255
WT	3	d200	29.16		WT	d800	Length	4	26.899	28.447	28.093	0.524	27.883	0.681	0.34	1.084
WT	3	d400	36.062		WT	d600	Length	4	25.008	34.66	30.178	3.336	30.006	3.977	1.989	6.329
WT	3	d600	29.563		WT	d400	Length	4	25.5	36.062	31.328	7.307	31.054	5.014	2.507	7.979
WT	3	d800	28.184		WT	d200	Length	4	23.04	30.005	27.621	4.05	27.072	3.173	1.586	5.049
WT	3	v200	30.76		WT	v200	Length	4	19.535	31.382	26.448	9.431	25.953	6.01	3.005	9.563
WT	3	v400	21.319		WT	v400	Length	4	18.05	24.278	20.338	3.028	20.751	2.708	1.354	4.309
WT	3	v600	24.046		WT	v600	Length	4	17.771	24.046	20.164	2.908	20.536	2.698	1.349	4.293
WT	4	d1000	29.315		dbKO	d1000	Length	4	15.16	21.651	16.724	2.23	17.565	2.841	1.421	4.521
WT	4	d200	26.082		dbKO	d800	Length	4	16.561	21.87	20.44	2.503	19.828	2.368	1.184	3.768
WT	4	d400	28.217		dbKO	d600	Length	4	16.952	20.19	17.48	1.293	18.026	1.488	0.744	2.367
WT	4	d600	30.794		dbKO	d400	Length	4	17.476	25.274	19.911	3.563	20.643	3.409	1.704	5.424
WT	4	d800	28.002		dbKO	d200	Length	4	19.081	26.277	20.556	2.079	21.618	3.187	1.593	5.071
WT	4	v200	31.382		dbKO	v200	Length	4	12.897	23.919	13.858	3.026	16.133	5.212	2.606	8.294
WT	4	v400	24.278		dbKO	v400	Length	4	10.064	16.963	12.348	2.719	12.931	2.946	1.473	4.688
WT	4	v600	21.057		dbKO	v600	Length	4	7.845	16.278	12.212	5.986	12.137	4.039	2.02	6.427
WT	6	d1000	30.713
WT	6	d200	30.005
WT	6	d400	34.439
WT	6	d600	34.66
WT	6	d800	28.447
WT	6	v200	22.135
WT	6	v400	19.357
WT	6	v600	19.271
WT	8	d1000	24.478
WT	8	d200	23.04
WT	8	d400	25.5
WT	8	d600	25.008
WT	8	d800	26.899
WT	8	v200	19.535
WT	8	v400	18.05
WT	8	v600	17.771
dbKO	1	d1000	17.129
dbKO	1	d200	20.369
dbKO	1	d400	25.274
dbKO	1	d600	20.19
dbKO	1	d800	21.224
dbKO	1	v200	13.678
dbKO	1	v400	13.01
dbKO	1	v600	14.797
dbKO	2	d1000	21.651
dbKO	2	d200	20.743
dbKO	2	d400	17.476
dbKO	2	d600	17.158
dbKO	2	d800	21.87
dbKO	2	v200	12.897
dbKO	2	v400	16.963
dbKO	2	v600	9.627
dbKO	5	d1000	16.319
dbKO	5	d200	26.277
dbKO	5	d400	18.836
dbKO	5	d600	16.952
dbKO	5	d800	19.656
dbKO	5	v200	14.039
dbKO	5	v400	11.685
dbKO	5	v600	7.845
dbKO	7	d1000	15.16
dbKO	7	d200	19.081
dbKO	7	d400	20.987
dbKO	7	d600	17.803
dbKO	7	d800	16.561
dbKO	7	v200	23.919
dbKO	7	v400	10.064
dbKO	7	v600	16.278
WT	3	ON	0
WT	4	ON	0
WT	6	ON	0
WT	8	ON	0
dbKO	1	ON	0
dbKO	2	ON	0
dbKO	5	ON	0
dbKO	7	ON	0

## Sheet: Fig6H1
Fig.6H1: dbKO 5 dpf
genotype	fish	number		genotype	variable	n	min	max	median	iqr	mean	sd	se	ci
WT	5	2.5		WT	number	5	0.5	11.5	6	7.5	6.1	4.709	2.106	5.847
WT	6	11.5		dbKO	number	4	20	28	24.25	3.125	24.125	3.326	1.663	5.292
WT	7	0.5
WT	8	6
WT	9	10
dbKO	1	25
dbKO	2	20
dbKO	3	23.5
dbKO	4	28

## Sheet: Fig6H2
Fig.6H2: dbKO 34 dpf
genotype	fish	number		genotype	variable	n	min	max	median	iqr	mean	sd	se	ci
WT	5	14		WT	number	3	14	28	27	7	23	7.81	4.509	19.402
WT	6	27		dbKO	number	3	207	314	265.5	53.5	262.167	53.578	30.933	133.095
WT	7	28
dbKO	1	265.5
dbKO	3	314
dbKO	4	207

## Sheet: Fig6H3
Fig.6H3: dbKO adult
genotype	fish	number		genotype	variable	n	min	max	median	iqr	mean	sd	se	ci
WT	3	18		WT	number	4	18	50	26.5	13.25	30.25	14.056	7.028	22.367
WT	4	23		dbKO	number	4	134	302	221	52.5	219.5	68.845	34.423	109.548
WT	5	30
WT	7	50
dbKO	1	134
dbKO	2	214
dbKO	6	302
dbKO	8	228
