# Supplementary material for: Disturbed retinoid metabolism upon loss of rlbp1a impairs cone function and leads to subretinal lipid deposits and photoreceptor degeneration in the zebrafish retina
Source: eLife. 2021 Oct 20;10:e71473. doi: 10.7554/eLife.71473 (PMC8585484; doi:10.7554/eLife.71473)
Supplement: Figure 8—source data 1. [file elife-71473-fig8-data1.xlsx]

## Sheet: Fig7E1
Fig.7E1: bKO 5 dpf
genotype	fish	region	Length		genotype	region	variable	n	min	max	median	iqr	mean	sd	se	ci
*rlbp1b* +/+	3	d105	9.812		*rlbp1b* +/+	d175	Length	5	7.214	9.265	8.348	0.9	8.168	0.807	0.361	1.002
*rlbp1b* +/+	3	d140	9.896		*rlbp1b* +/+	d140	Length	5	7.902	10.539	9.896	0.546	9.631	1.023	0.458	1.271
*rlbp1b* +/+	3	d175	7.5575		*rlbp1b* +/+	d105	Length	5	9.053	9.892	9.422	0.709	9.456	0.389	0.174	0.483
*rlbp1b* +/+	3	d35	10.2325		*rlbp1b* +/+	d70	Length	5	8.46	11.034	8.924	0.777	9.251	1.053	0.471	1.307
*rlbp1b* +/+	3	d70	8.5295		*rlbp1b* +/+	d35	Length	5	8.77	10.578	9.848	0.505	9.831	0.681	0.305	0.846
*rlbp1b* +/+	3	v105	6.7955		*rlbp1b* +/+	v35	Length	5	11.358	12.883	11.416	0.794	11.849	0.674	0.302	0.837
*rlbp1b* +/+	3	v35	11.358		*rlbp1b* +/+	v70	Length	5	8.703	12.181	9.422	0.752	9.905	1.353	0.605	1.679
*rlbp1b* +/+	3	v70	9.233		*rlbp1b* +/+	v105	Length	5	6.795	10.074	7.724	1.838	8.04	1.377	0.616	1.71
*rlbp1b* +/+	4	d105	9.0535		*rlbp1b* -/-	d175	Length	5	7.963	11.305	8.653	1.078	9.161	1.32	0.59	1.639
*rlbp1b* +/+	4	d140	10.1825		*rlbp1b* -/-	d140	Length	5	8.651	9.825	9.446	0.421	9.385	0.461	0.206	0.573
*rlbp1b* +/+	4	d175	8.3475		*rlbp1b* -/-	d105	Length	5	8.35	10.059	9.854	0.56	9.552	0.712	0.318	0.884
*rlbp1b* +/+	4	d35	9.8485		*rlbp1b* -/-	d70	Length	5	8.214	9.91	9.163	0.939	9.05	0.69	0.308	0.856
*rlbp1b* +/+	4	d70	8.4605		*rlbp1b* -/-	d35	Length	5	8.325	10.809	10.38	0.513	10.066	1.006	0.45	1.249
*rlbp1b* +/+	4	v105	6.8835		*rlbp1b* -/-	v35	Length	5	11.121	15.314	12.462	1.227	12.99	1.575	0.705	1.956
*rlbp1b* +/+	4	v35	11.4165		*rlbp1b* -/-	v70	Length	5	9.213	10.722	9.567	0.605	9.815	0.598	0.268	0.743
*rlbp1b* +/+	4	v70	8.7025		*rlbp1b* -/-	v105	Length	5	7.835	9.574	8.738	0.472	8.646	0.644	0.288	0.8
*rlbp1b* +/+	7	d105	9.103
*rlbp1b* +/+	7	d140	9.6365
*rlbp1b* +/+	7	d175	9.2655
*rlbp1b* +/+	7	d35	10.5785
*rlbp1b* +/+	7	d70	11.0335
*rlbp1b* +/+	7	v105	10.074
*rlbp1b* +/+	7	v35	11.396
*rlbp1b* +/+	7	v70	12.181
*rlbp1b* +/+	8	d105	9.8925
*rlbp1b* +/+	8	d140	10.539
*rlbp1b* +/+	8	d175	7.214
*rlbp1b* +/+	8	d35	8.7705
*rlbp1b* +/+	8	d70	9.307
*rlbp1b* +/+	8	v105	8.721
*rlbp1b* +/+	8	v35	12.8825
*rlbp1b* +/+	8	v70	9.4215
*rlbp1b* +/+	10	d105	9.4215
*rlbp1b* +/+	10	d140	7.9015
*rlbp1b* +/+	10	d175	8.4575
*rlbp1b* +/+	10	d35	9.727
*rlbp1b* +/+	10	d70	8.9245
*rlbp1b* +/+	10	v105	7.7245
*rlbp1b* +/+	10	v35	12.1905
*rlbp1b* +/+	10	v70	9.9855
*rlbp1b* -/-	1	d105	8.35
*rlbp1b* -/-	1	d140	8.651
*rlbp1b* -/-	1	d175	7.9635
*rlbp1b* -/-	1	d35	10.153
*rlbp1b* -/-	1	d70	8.513
*rlbp1b* -/-	1	v105	7.835
*rlbp1b* -/-	1	v35	12.4135
*rlbp1b* -/-	1	v70	9.483
*rlbp1b* -/-	2	d105	10.059
*rlbp1b* -/-	2	d140	9.7125
*rlbp1b* -/-	2	d175	9.482
*rlbp1b* -/-	2	d35	10.3805
*rlbp1b* -/-	2	d70	9.452
*rlbp1b* -/-	2	v105	9.574
*rlbp1b* -/-	2	v35	13.6405
*rlbp1b* -/-	2	v70	10.7225
*rlbp1b* -/-	5	d105	10.027
*rlbp1b* -/-	5	d140	9.8245
*rlbp1b* -/-	5	d175	8.653
*rlbp1b* -/-	5	d35	8.3245
*rlbp1b* -/-	5	d70	9.91
*rlbp1b* -/-	5	v105	8.7375
*rlbp1b* -/-	5	v35	12.4615
*rlbp1b* -/-	5	v70	9.213
*rlbp1b* -/-	6	d105	9.8545
*rlbp1b* -/-	6	d140	9.292
*rlbp1b* -/-	6	d175	11.305
*rlbp1b* -/-	6	d35	10.8085
*rlbp1b* -/-	6	d70	8.2135
*rlbp1b* -/-	6	v105	8.7775
*rlbp1b* -/-	6	v35	15.3135
*rlbp1b* -/-	6	v70	9.5675
*rlbp1b* -/-	9	d105	9.4675
*rlbp1b* -/-	9	d140	9.446
*rlbp1b* -/-	9	d175	8.4035
*rlbp1b* -/-	9	d35	10.666
*rlbp1b* -/-	9	d70	9.1635
*rlbp1b* -/-	9	v105	8.3055
*rlbp1b* -/-	9	v35	11.121
*rlbp1b* -/-	9	v70	10.0885
*rlbp1b* +/+	3	ON	0
*rlbp1b* +/+	4	ON	0
*rlbp1b* +/+	7	ON	0
*rlbp1b* +/+	8	ON	0
*rlbp1b* +/+	10	ON	0
*rlbp1b* -/-	1	ON	0
*rlbp1b* -/-	2	ON	0
*rlbp1b* -/-	5	ON	0
*rlbp1b* -/-	6	ON	0
*rlbp1b* -/-	9	ON	0

## Sheet: Fig7E2
Fig.7E2: bKO adult
genotype	fish	region	Length		genotype	region	variable	n	min	max	median	iqr	mean	sd	se	ci
*rlbp1b* +/+	1	d1000	30.713		*rlbp1b* +/+	d1000	Length	4	19.732	30.713	23.596	8.534	24.409	5.559	2.78	8.846
*rlbp1b* +/+	1	d200	30.681		*rlbp1b* +/+	d800	Length	4	26.247	32.893	27.3	2.16	28.435	3.025	1.513	4.814
*rlbp1b* +/+	1	d400	36.112		*rlbp1b* +/+	d600	Length	4	19.555	32.356	28.33	7.882	27.143	5.974	2.987	9.505
*rlbp1b* +/+	1	d600	32.356		*rlbp1b* +/+	d400	Length	4	18.568	36.112	31.114	9.845	29.227	8.055	4.027	12.817
*rlbp1b* +/+	1	d800	32.893		*rlbp1b* +/+	d200	Length	4	15.895	30.867	28.669	6.762	26.025	7.027	3.514	11.182
*rlbp1b* +/+	1	v200	22.061		*rlbp1b* +/+	v200	Length	4	19.906	23.614	22.517	1.611	22.138	1.619	0.81	2.576
*rlbp1b* +/+	1	v400	19.561		*rlbp1b* +/+	v400	Length	4	17.458	19.561	17.742	0.841	18.126	0.981	0.491	1.561
*rlbp1b* +/+	1	v600	19.561		*rlbp1b* +/+	v600	Length	4	14.236	19.561	17.462	2.78	17.18	2.335	1.168	3.716
*rlbp1b* +/+	4	d1000	19.732		*rlbp1b* -/-	d1000	Length	4	20.929	33.282	29.553	3.997	28.329	5.261	2.63	8.371
*rlbp1b* +/+	4	d200	15.895		*rlbp1b* -/-	d800	Length	4	26.329	34.545	30.232	3.965	30.334	3.514	1.757	5.591
*rlbp1b* +/+	4	d400	18.568		*rlbp1b* -/-	d600	Length	4	26.444	34.315	33.344	2.69	31.862	3.662	1.831	5.827
*rlbp1b* +/+	4	d600	19.555		*rlbp1b* -/-	d400	Length	4	24.224	29.119	27.742	2.393	27.207	2.187	1.093	3.479
*rlbp1b* +/+	4	d800	26.247		*rlbp1b* -/-	d200	Length	4	26.709	32.824	30.383	2.081	30.075	2.54	1.27	4.041
*rlbp1b* +/+	4	v200	19.906		*rlbp1b* -/-	v200	Length	4	22.694	29.896	25.588	1.806	25.941	2.968	1.484	4.723
*rlbp1b* +/+	4	v400	17.532		*rlbp1b* -/-	v400	Length	4	18.138	23.091	22.35	2.073	21.483	2.302	1.151	3.663
*rlbp1b* +/+	4	v600	16.496		*rlbp1b* -/-	v600	Length	4	13.828	20.485	17.032	4.022	17.094	3.006	1.503	4.784
*rlbp1b* +/+	7	d1000	27.455
*rlbp1b* +/+	7	d200	26.656
*rlbp1b* +/+	7	d400	34.754
*rlbp1b* +/+	7	d600	31.451
*rlbp1b* +/+	7	d800	27.632
*rlbp1b* +/+	7	v200	23.614
*rlbp1b* +/+	7	v400	17.458
*rlbp1b* +/+	7	v600	18.428
*rlbp1b* +/+	8	d1000	19.737
*rlbp1b* +/+	8	d200	30.867
*rlbp1b* +/+	8	d400	27.475
*rlbp1b* +/+	8	d600	25.209
*rlbp1b* +/+	8	d800	26.967
*rlbp1b* +/+	8	v200	22.973
*rlbp1b* +/+	8	v400	17.952
*rlbp1b* +/+	8	v600	14.236
*rlbp1b* -/-	2	d1000	28.947
*rlbp1b* -/-	2	d200	26.709
*rlbp1b* -/-	2	d400	28.522
*rlbp1b* -/-	2	d600	32.863
*rlbp1b* -/-	2	d800	31.506
*rlbp1b* -/-	2	v200	25.592
*rlbp1b* -/-	2	v400	23.091
*rlbp1b* -/-	2	v600	20.485
*rlbp1b* -/-	3	d1000	20.929
*rlbp1b* -/-	3	d200	30.752
*rlbp1b* -/-	3	d400	26.963
*rlbp1b* -/-	3	d600	26.444
*rlbp1b* -/-	3	d800	26.329
*rlbp1b* -/-	3	v200	25.584
*rlbp1b* -/-	3	v400	18.138
*rlbp1b* -/-	3	v600	13.828
*rlbp1b* -/-	5	d1000	30.159
*rlbp1b* -/-	5	d200	30.015
*rlbp1b* -/-	5	d400	29.119
*rlbp1b* -/-	5	d600	34.315
*rlbp1b* -/-	5	d800	34.545
*rlbp1b* -/-	5	v200	29.896
*rlbp1b* -/-	5	v400	22.907
*rlbp1b* -/-	5	v600	18.603
*rlbp1b* -/-	6	d1000	33.282
*rlbp1b* -/-	6	d200	32.824
*rlbp1b* -/-	6	d400	24.224
*rlbp1b* -/-	6	d600	33.826
*rlbp1b* -/-	6	d800	28.958
*rlbp1b* -/-	6	v200	22.694
*rlbp1b* -/-	6	v400	21.794
*rlbp1b* -/-	6	v600	15.46
*rlbp1b* +/+	1	ON	0
*rlbp1b* +/+	4	ON	0
*rlbp1b* +/+	7	ON	0
*rlbp1b* +/+	8	ON	0
*rlbp1b* -/-	2	ON	0
*rlbp1b* -/-	3	ON	0
*rlbp1b* -/-	5	ON	0
*rlbp1b* -/-	6	ON	0

## Sheet: Fig7F1
Fig.7F1: bKO 5 dpf
genotype	fish	number		genotype	variable	n	min	max	median	iqr	mean	sd	se	ci
rlbp1b +/+	3	7.5		*rlbp1b*	number	4	5	17	7	3.75	9	5.431	2.716	8.643
rlbp1b +/+	4	5		*rlbp1b*	number	4	4.5	9	6	2.625	6.375	2.056	1.028	3.272
rlbp1b +/+	7	17
rlbp1b +/+	8	6.5
rlbp1b -/-	1	9
rlbp1b -/-	2	4.5
rlbp1b -/-	5	5
rlbp1b -/-	6	7

## Sheet: Fig7F2
Fig.7F2: bKO adult
genotype	name	number		genotype	variable	n	min	max	median	iqr	mean	sd	se	ci
*rlbp1b* +/+	1	76		*rlbp1b* +/+	number	4	14	76	38.5	20.75	41.75	25.747	12.874	40.969
*rlbp1b* +/+	5	35		*rlbp1b* -/-	number	4	10	111	48.5	48.5	54.5	43.684	21.842	69.512
*rlbp1b* +/+	6	42
*rlbp1b* +/+	8	14
*rlbp1b* -/-	2	111
*rlbp1b* -/-	3	10
*rlbp1b* -/-	4	33
*rlbp1b* -/-	7	64
